# Supplementary material for: Smooth muscle cell–specific fibronectin-EDA mediates phenotypic switching and neointimal hyperplasia
Source: JCI journal article supplement (doi:10.1172/jci124708), 2019-11-24

## **Online Supplements**

### **Smooth muscle cell-specific Fibronectin-EDA mediates Phenotypic Switching and Neointimal Hyperplasia**

Manish Jain<sup>1</sup>, Nirav Dhanesha<sup>1</sup>, Prakash Doddapattar<sup>1</sup>, Mehul R. Chorawala<sup>1</sup>, Manasa K. Nayak<sup>1</sup>, Anne Cornelissen<sup>2</sup>, Liang Guo<sup>2</sup>, Alope V. Finn<sup>2</sup>, Steven R. Lentz<sup>1</sup>, and Anil K. Chauhan<sup>1</sup>

<sup>1</sup>Department of Internal Medicine, Division of Hematology/Oncology, University of Iowa, Iowa City, IA.

<sup>2</sup>CVPath Institute Inc., Gaithersburg, MD.

## Materials

**Online supplementary Table 1.** Patient and Stent Characteristics

| Characteristic                           |                   |
|------------------------------------------|-------------------|
| No. of patients, n                       | 6                 |
| No. of stents, n                         | 7                 |
| Age, mean $\pm$ SD, y                    | 70 $\pm$ 5        |
| Male, n (%)                              | 4 (66.67%)        |
| Smokers, n (%)                           | 0 (0%)            |
| Hypertension, n (%)                      | 4 (66.67%)        |
| Hypercholesterolemia, n (%)              | 0 (0%)            |
| Diabetes Mellitus, n (%)                 | 2 (28.57%)        |
| Indication for stenting, n (%)           |                   |
| CAD                                      | 5 (83.34%)        |
| ACS                                      | 1 (16.67%)        |
| Culprit artery, n (%)                    |                   |
| LAD                                      | 5 (71.43%)        |
| LCX                                      | 2 (28.57%)        |
| RCA                                      | 0                 |
| No. of diseased vessels, n (%)           |                   |
| 1                                        | 1 (16.67%)        |
| 2                                        | 2 (28.57%)        |
| 3                                        | 3 (50%)           |
| Type of stent, n (%)                     |                   |
| Multilink                                | 5 (71.43%)        |
| Multilink Duet                           | 2 (28.57%)        |
| Duration of implant, mean $\pm$ SD, days | 86.14 $\pm$ 24.72 |
| Underlying pathology                     |                   |
| Plaque rupture, n (%)                    | 1 (14.29%)        |
| FA, n (%)                                | 4 (57.14%)        |
| fibrocalcific plaque, n (%)              | 2 (28.57%)        |

CAD, Coronary Artery Disease; ACS, Acute Coronary Syndrome; LAD, Left Anterior Descending; LCX, Left Circumflex Artery; RCA, Right Coronary Artery; FA, Fibroatheroma

**Online supplementary Table 2:** Complete blood counts from 8- 10 weeks old mice were obtained using automated veterinary hematology analyzer (Advia). Value are expressed as mean  $\pm$  SEM. N= 5-6 mice/group. P= Non-significant versus control Fn-EDA<sup>n/n</sup> Apoe<sup>-/-</sup> mice

| Complete blood count              | Fn-EDA <sup>n/n</sup> Apoe <sup>-/-</sup> BM $\rightarrow$<br>Fn-EDA <sup>n/n</sup> Apoe <sup>-/-</sup> |      | Fn-EDA <sup>n/n</sup> Apoe <sup>-/-</sup> BM $\rightarrow$<br>Fn-EDA <sup>n/n</sup> Tie2Cre <sup>+</sup> Apoe <sup>-/-</sup> |      | P Value |
|-----------------------------------|---------------------------------------------------------------------------------------------------------|------|------------------------------------------------------------------------------------------------------------------------------|------|---------|
|                                   | Mean                                                                                                    | SEM  | Mean                                                                                                                         | SEM  |         |
| WBC (10 <sup>3</sup> /μL)         | 10.37                                                                                                   | 1.01 | 9.99                                                                                                                         | 0.96 | 0.82    |
| RBC (10 <sup>6</sup> /μL)         | 10.15                                                                                                   | 0.85 | 10.01                                                                                                                        | 0.94 | 0.92    |
| HGB (g/dL)                        | 13.32                                                                                                   | 1.41 | 12.24                                                                                                                        | 1.52 | 0.61    |
| HCT (%)                           | 52.56                                                                                                   | 4.40 | 52.02                                                                                                                        | 4.84 | 0.94    |
| PLT (10 <sup>3</sup> /μL)         | 1219                                                                                                    | 96   | 1159                                                                                                                         | 103  | 0.71    |
| Neutrophil (10 <sup>3</sup> /μL)  | 0.70                                                                                                    | 0.13 | 0.54                                                                                                                         | 0.12 | 0.35    |
| Lymphocytes (10 <sup>3</sup> /μL) | 6.48                                                                                                    | 0.80 | 6.89                                                                                                                         | 0.81 | 0.85    |
| Monocytes (10 <sup>3</sup> /μL)   | 2.52                                                                                                    | 0.40 | 1.48                                                                                                                         | 0.42 | 0.09    |

WBC, White Blood cells; RBC, Red Blood cells; HGB, Hemoglobin; HCT, Hematocrit; PLT, Platelet

**Online supplementary Table 3.** List of Antibodies

| <b>Antibody</b>                           | <b>Company</b> | <b>Catalog</b>   | <b>Species</b>  | <b>Application</b> |
|-------------------------------------------|----------------|------------------|-----------------|--------------------|
| p-AKT1 (S473)                             | Cell Signaling | 9018             | Rabbit          | WB                 |
| AKT (pan)                                 | Cell Signaling | 4691             | Rabbit          | WB                 |
| p-AKT2 (S474)                             | Cell Signaling | 8599             | Rabbit          | WB                 |
| AKT2                                      | Cell Signaling | 3063             | Rabbit          | WB                 |
| p-mTOR (Ser2448)                          | Cell Signaling | 2971             | Rabbit          | WB                 |
| mTOR                                      | Cell Signaling | 2972             | Rabbit          | WB                 |
| p-NFκB p65 (Ser536)                       | Cell Signaling | 3033             | Rabbit          | WB                 |
| NFκB p65                                  | Cell Signaling | 8242             | Rabbit          | WB                 |
| p-FAK (Tyr397)                            | Cell Signaling | 3283             | Rabbit          | WB                 |
| FAK                                       | Cell Signaling | 3285             | Rabbit          | WB                 |
| p-Src Family (Tyr416)                     | Cell Signaling | 2101             | Rabbit          | WB                 |
| Src                                       | Cell Signaling | 2108             | Rabbit          | WB                 |
| p-ERK 1/2                                 | Cell Signaling |                  | Rabbit          | WB                 |
| p-p44/42 MAPK (Erk1/2)<br>(Thr202/Tyr204) | Cell Signaling | 9101             | Rabbit          | WB                 |
| p44/42 MAPK (Erk1/2)                      | Cell Signaling | 9102             | Rabbit          | WB                 |
| CD31                                      | Abcam          | Ab28364          | Rabbit          | IF                 |
| CD68                                      | Abcam          | Ab125212         | Rabbit          | IF                 |
| Anti-Fibronectin                          | Abcam          | Ab2413           | Rabbit          | IF, WB             |
| β-Actin                                   | Abcam          | Ab8227           | Rabbit          | WB                 |
| Osteopontin                               | Abcam          | ab8448           | Rabbit          | IF, WB             |
| SM22 alpha                                | Abcam          | ab14106          | Rabbit          | IF, WB             |
| Vimentin                                  | Abcam          | ab92547          | Rabbit          | IF, WB             |
| Smooth Muscle Myosin Heavy<br>Chain 11    | Abcam          | Ab683<br>Ab82541 | Mouse<br>Rabbit | IF<br>WB           |
| TLR4                                      | Abcam          | ab22048          | Mouse           | IP, WB             |
| BrdU                                      | Abcam          | Ab6326           | Rat             | IF                 |
| α-SMA                                     | Sigma          | A5228            | Mouse           | IF,                |
| FN-3E2                                    | Sigma          | F6140            | Mouse           | IP, WB             |



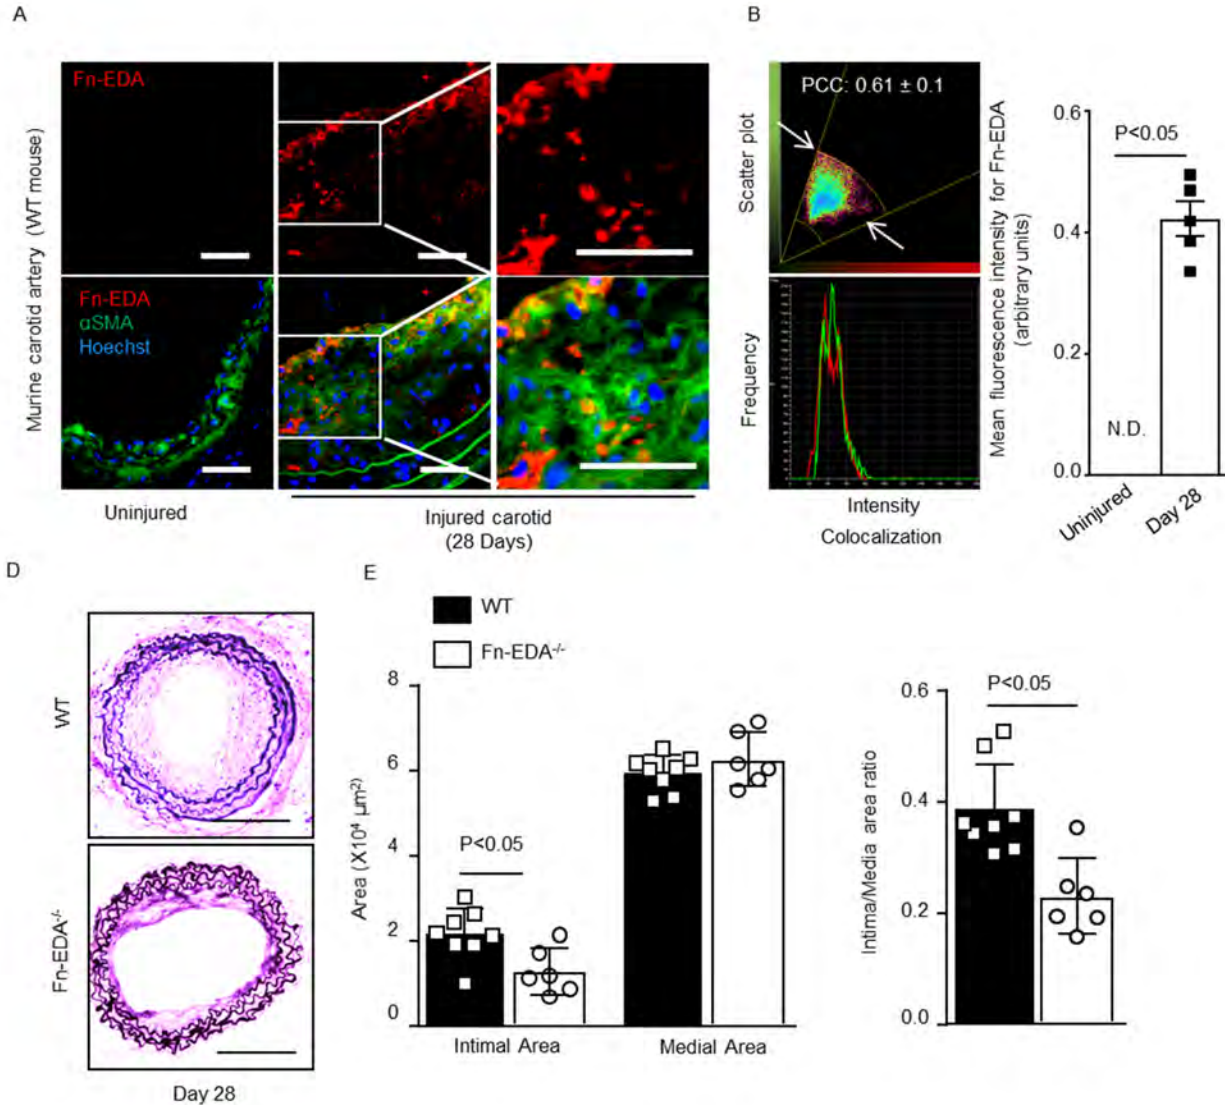

**Figure S1. Expression and role of Fn-EDA in intimal hyperplasia.** (A) Representative images showing double-immunostaining for Fn-EDA (red) and SMCs (green) in uninjured and injured carotid artery of WT mice harvested after 28 days of injury. N=5-6/group. Nuclei are counterstained with Hoechst (blue). Boxed region is magnified. Scale bar, 50  $\mu\text{m}$ . (B) Representative scatter plot and intensity profile demonstrating colocalized pixels and pixel intensity for both channels (Fn-EDA-red, x-axis and SMC-green, y-axis) with Pearson's correlation coefficients (PCC). Colocalized pixels are defined as those whose intensity values for both channels fall within a preset range above the background intensity level (white arrows). (C) Quantification of the Fn-EDA-fluorescence intensity. (D) Representative photomicrographs of Verhoeff's Van Gieson stained carotid artery sections of Fn-EDA<sup>-/-</sup> and WT mice after 28 days of injury (N=6-8/group). Scale bar: 200  $\mu\text{m}$ . (E) Quantification is showing intima area, media area and a ratio of intima to the media area. Each dot represents a single mouse. Values are represented as mean  $\pm$  SEM. Statistical analysis: unpaired student t-test.

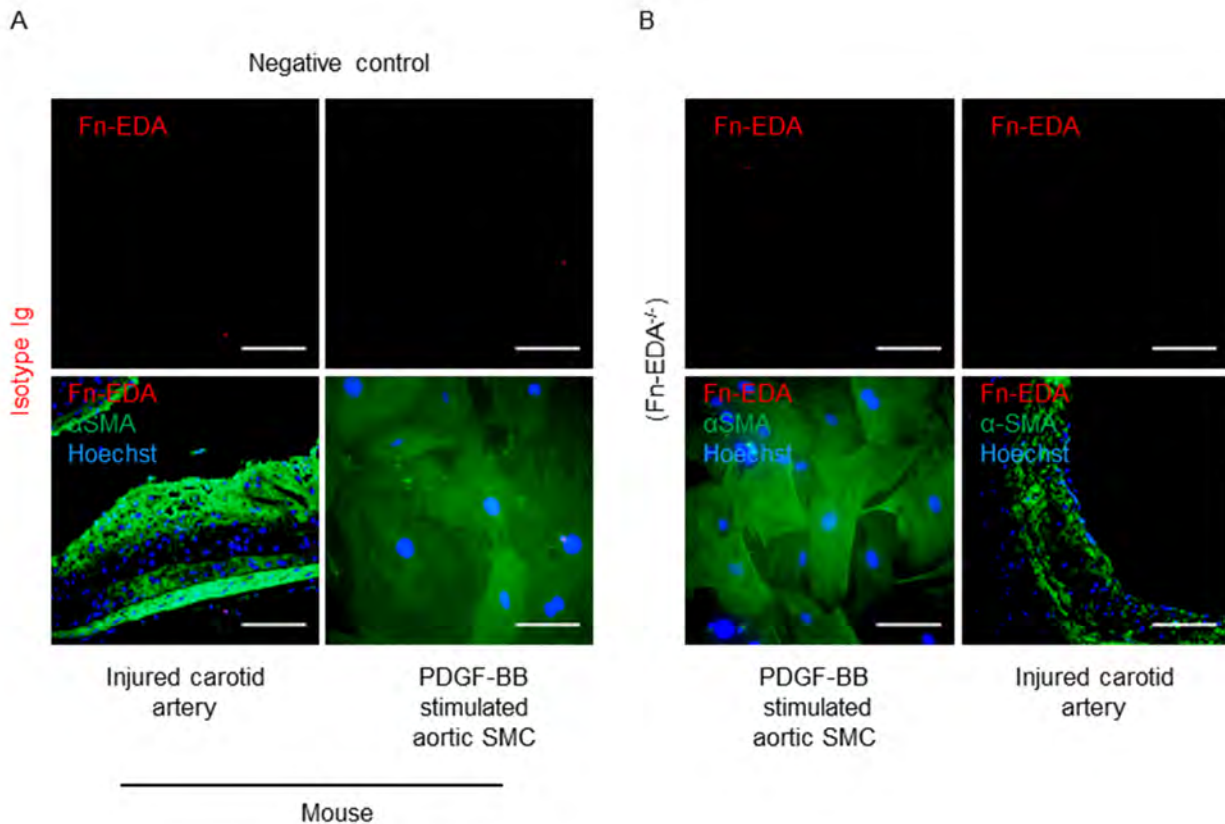

**Figure S2. Negative controls.** (A) Representative images of isotype controls for Fn-EDA (red) in injured carotid artery of *Apoe*<sup>-/-</sup> mice harvested after 28 days of injury and PDGF-BB stimulated SMCs from *Apoe*<sup>-/-</sup> mouse. N=5-6/group. SMC are stained with  $\alpha$ SMA (green) and nuclei are counterstained with Hoechst (blue). Scale bar for arterial sections, 50  $\mu$ m; for isolated SMC, 25  $\mu$ m. (B) Fn-EDA was not detected in PDGF-BB stimulated SMCs or wire injured carotid artery sections of *Fn-EDA*<sup>-/-</sup>*Apoe*<sup>-/-</sup> mice confirming specificity of anti-Fn-EDA Ig.

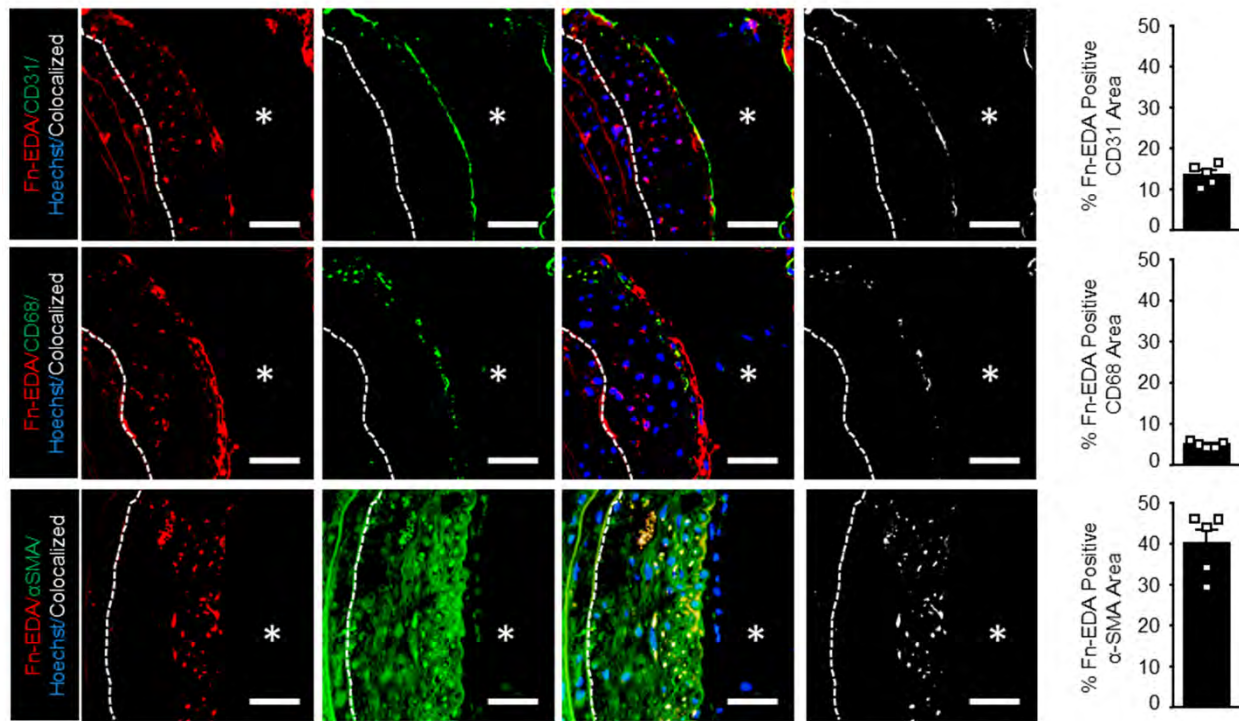

**Figure S3. Cellular distribution of Fn-EDA in the neointima of *Apoe*<sup>-/-</sup> mice.** Representative images showing double-immunostaining of Fn-EDA (red) with endothelial cells (CD31, green, upper panel); macrophage (CD68, green, middle panel) and smooth muscle cells (αSMA, green, lower panel) in injured carotid artery of *Apoe*<sup>-/-</sup> mice harvested after 28 days of injury. Nuclei are counterstained with Hoechst (blue). Scale bar, 50 μm. Dotted line separates external elastic lamina and neointima while \* denotes lumen. Respective quantification in the right side is showing percentage of Fn-EDA positive endothelial cells, macrophages or smooth muscle cells. N=5-6/group. Values are represented as mean ± SEM.

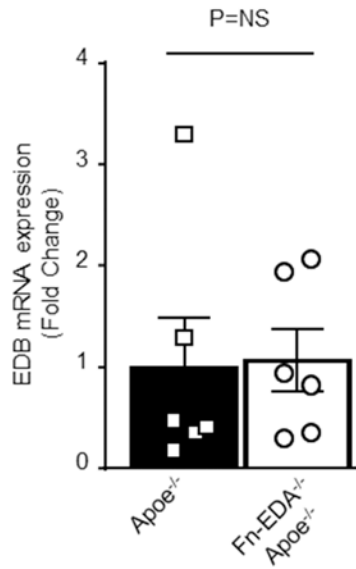

**Figure S4. Effect of Fn-EDA deletion on Fn-EDB expression.** Quiescent SMCs from Apoe<sup>-/-</sup> and Fn-EDA<sup>-/-</sup> Apoe<sup>-/-</sup> were stimulated with PDGF-BB (20 ng/mL) for 24 hours and cells were processed for mRNA expression. Bar graph representing mRNA expression of Fn-EDB normalized to GAPDH and expressed as fold change (N=6/group). Values are represented as mean  $\pm$  SEM. Statistical analysis: unpaired student t test.



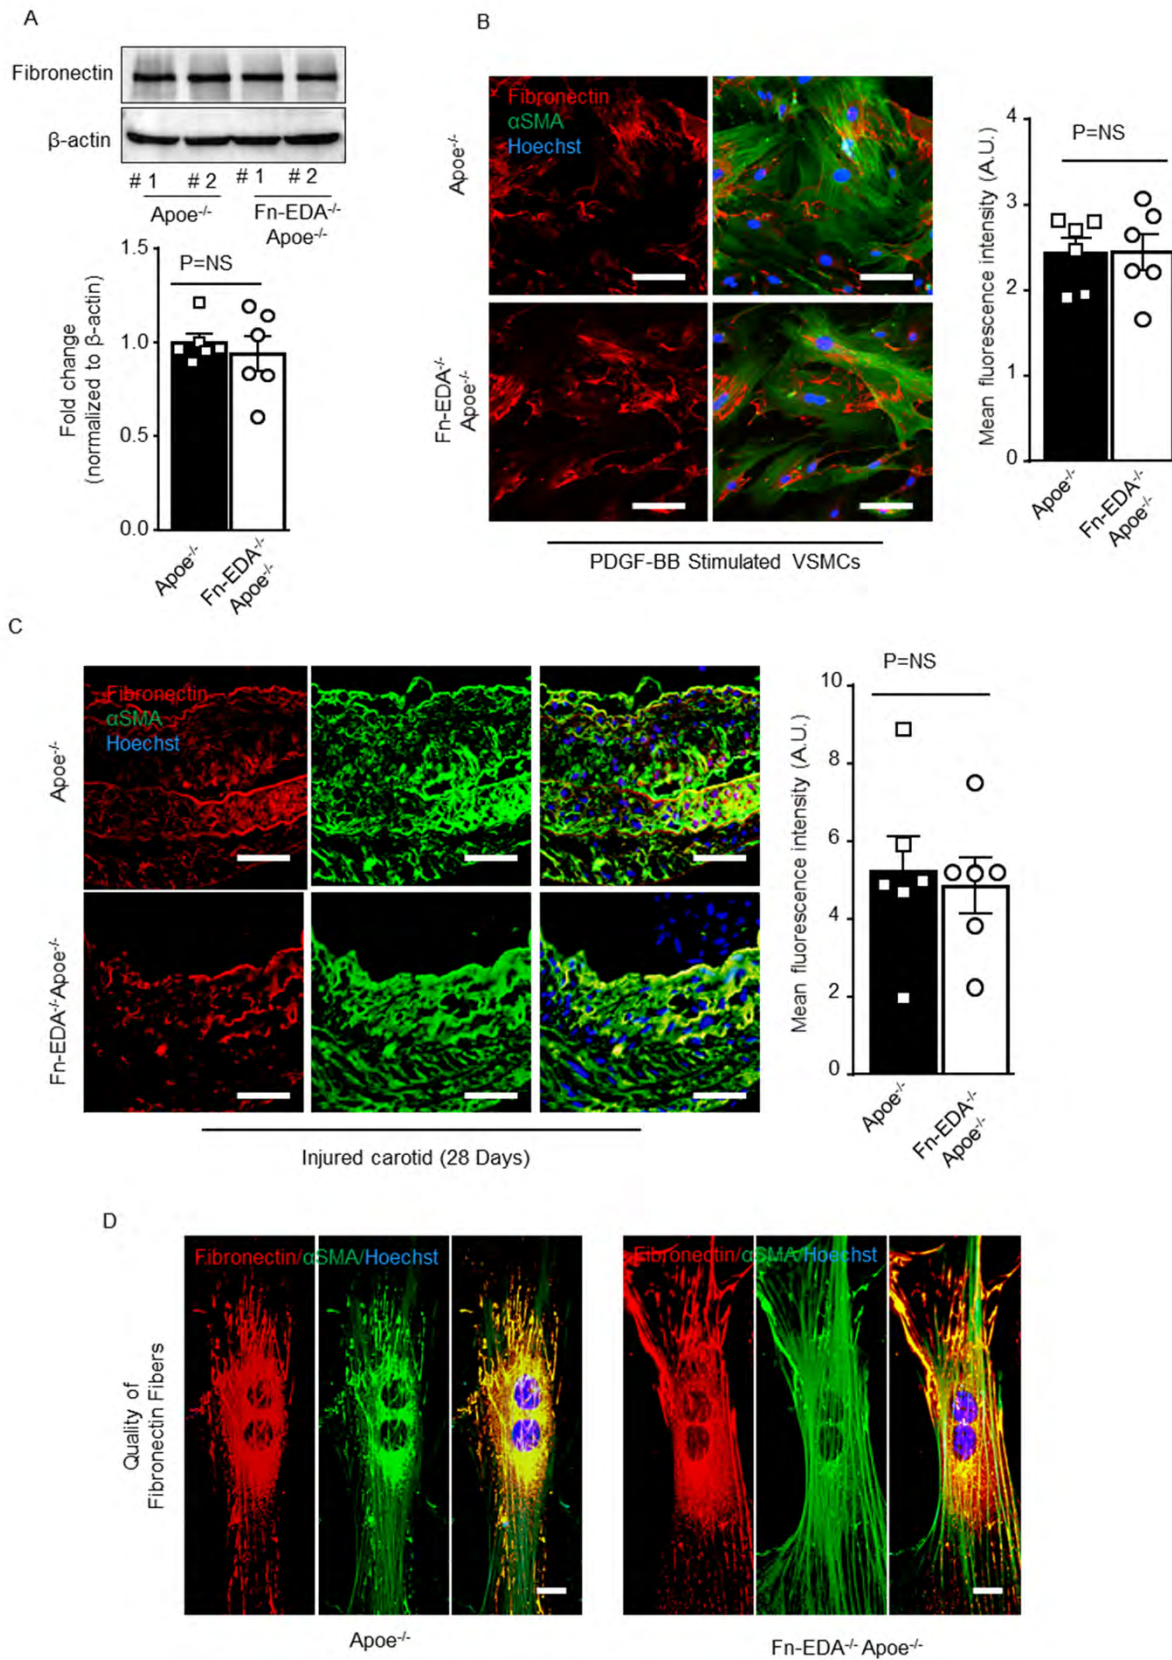

**Figure S5. Effect of Fn-EDA deletion on total Fn levels.** Quiescent SMCs were stimulated with PDGF-BB (20 ng/mL) for 24 hours. **(A)** Western blotting and **(B)** immunofluorescence staining of total Fn (N=6/group). The right panel in A and B shows quantification of Fn expression (N=6 /group). Scale bar, 50  $\mu$ m. **(C)** The left panels show representative double immunostaining for total Fn (red) and SMC (green) in carotid artery sections of in Apoe<sup>-/-</sup> and Fn-EDA<sup>-/-</sup>Apoe<sup>-/-</sup> mice harvested after 28 days of wire injury. Scale bar: 50  $\mu$ m. The right panel show quantification of total Fn expression (N=6/group). **(D)** Immunofluorescence analysis of Fn (red) and actin ( $\alpha$ SMA, green) fibers. Nuclei are counterstained with Hoechst (blue). Values are expressed as mean  $\pm$  SEM. Statistical analysis: unpaired student t test.

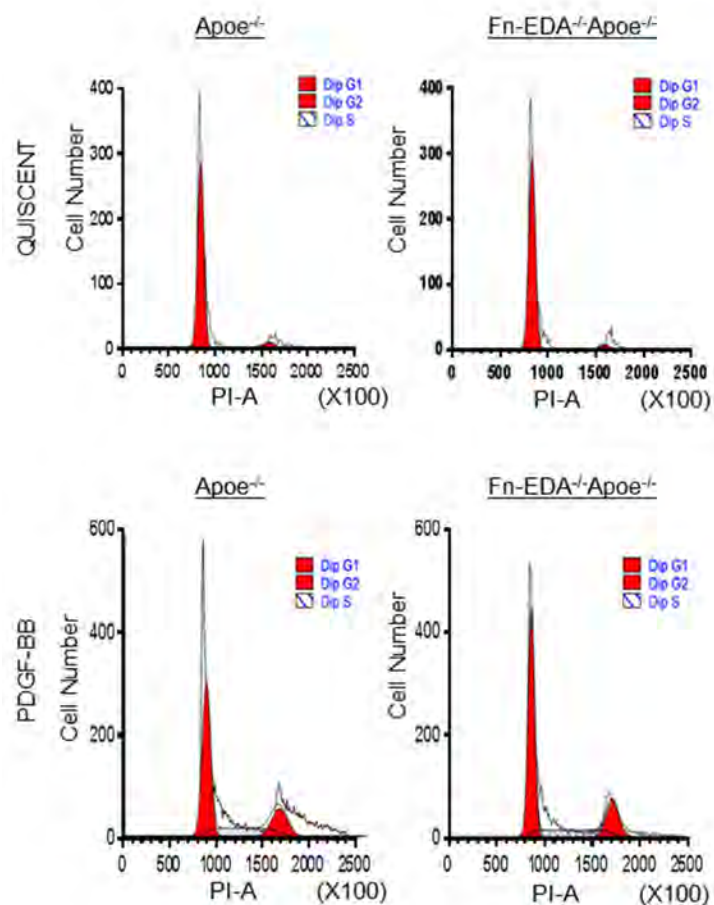

**Figure S6: Cell cycle histograms.** Serum-starved SMCs were stimulated with PDGF-BB for 24 hours. Representative DNA histograms of propidium iodide fluorescence in cells assessed by flow cytometry are shown.

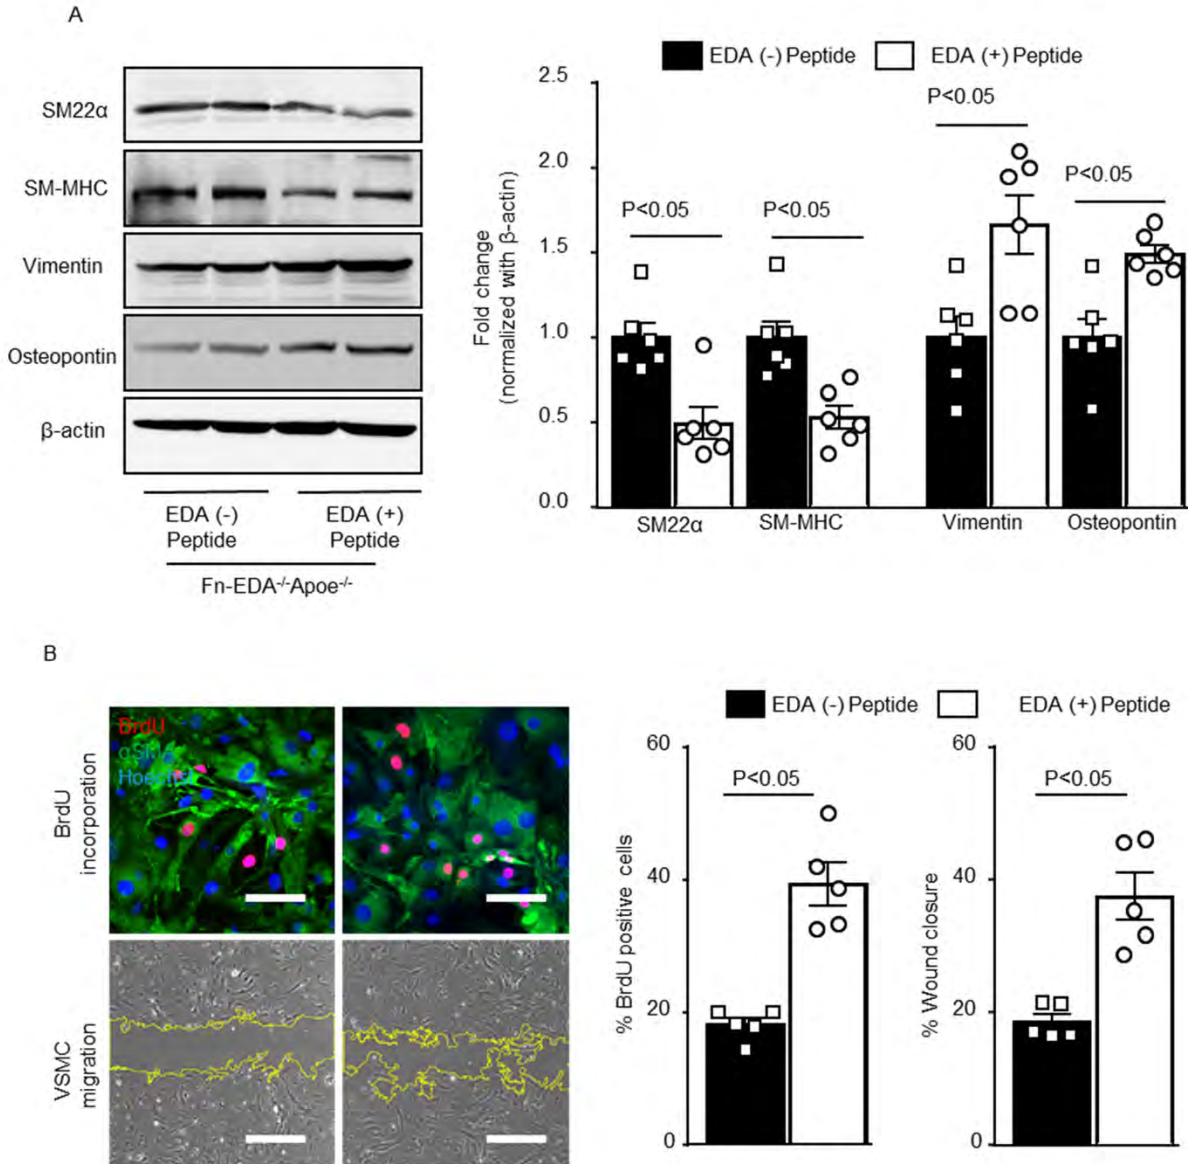

**Figure S7: Fn-EDA peptide potentiates SMC phenotypic switching.** Quiescent SMCs were exposed to 10  $\mu\text{g/ml}$  of recombinant peptides containing (EDA+) or lacking (EDA-) for 24 hours. **(A)** Cells were processed for Western blotting. Representative immunoblots and densitometric analysis of contractile proteins [smooth muscle 22 alpha (SM22 $\alpha$ ), smooth muscle myosin heavy chain (SM-MHC)], and synthetic proteins (vimentin and osteopontin),  $N=6/\text{group}$ . All blots are with same biological samples. #1 and #2 represent two separate samples. **(B)** The upper left panels show representative images of SMC proliferation where BrdU-positive cells (red) were co-stained with  $\alpha\text{SMA}$  (green) and Hoechst (blue). Scale bar: 50  $\mu\text{m}$ . Lower left panels show representative phase-contrast images of SMC migration in the scratch assay. Scale bar: 500  $\mu\text{m}$ . The middle and right panels show quantification of BrdU-positive cells ( $N=5/\text{group}$ ) and migrated area ( $N=5$ ). Values are expressed as mean  $\pm$  SEM. Statistical analysis: unpaired student t-test.



A

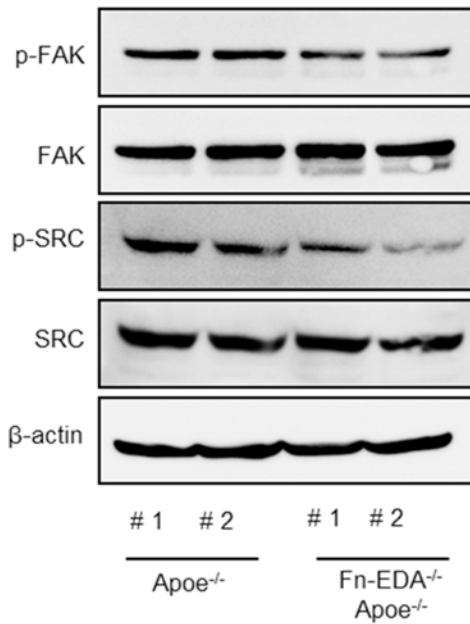

B

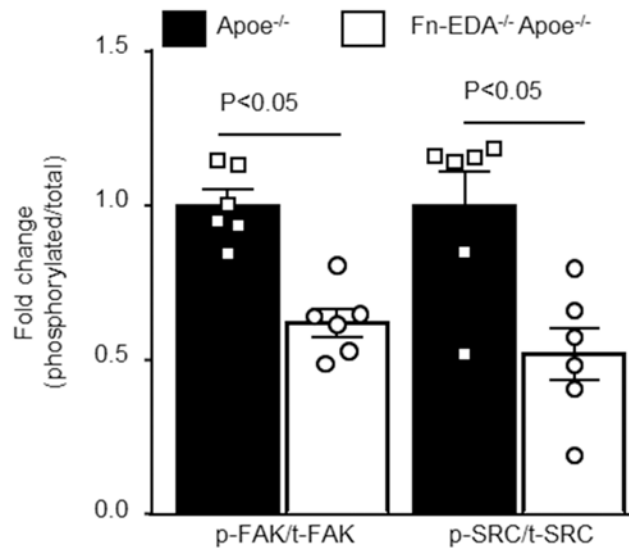

**Figure S8. Defective Integrin signaling in Fn-EDA<sup>-/-</sup>Apoe<sup>-/-</sup> mice.** Quiescent SMCs from Apoe<sup>-/-</sup> and Fn-EDA<sup>-/-</sup>Apoe<sup>-/-</sup> were stimulated with PDGF-BB (20 ng/ml) for 15 minutes and cells were processed for Western blotting. **(A, B)** Representative Immunoblots and densitometric analysis of FAK and Src (N=6/group). Blots for FAK and SRC are with same biological samples run in parallel. Values are expressed as mean  $\pm$  SEM. Statistical analysis: unpaired student t-test.

A

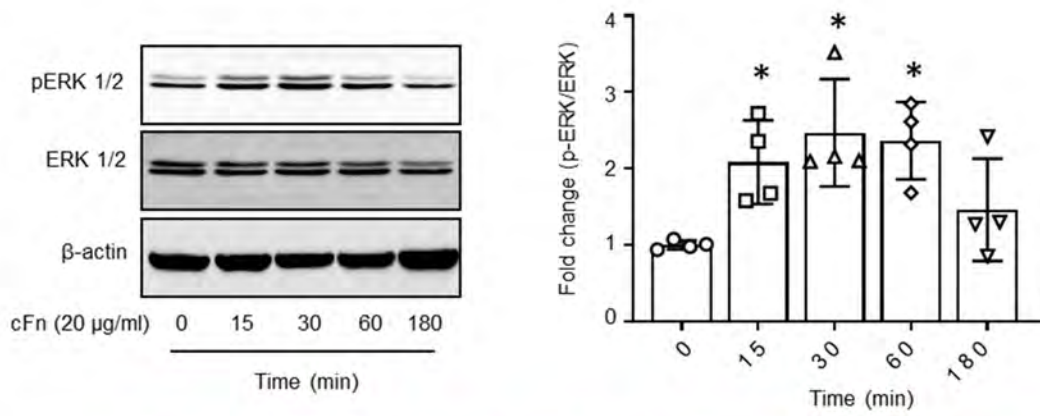

B

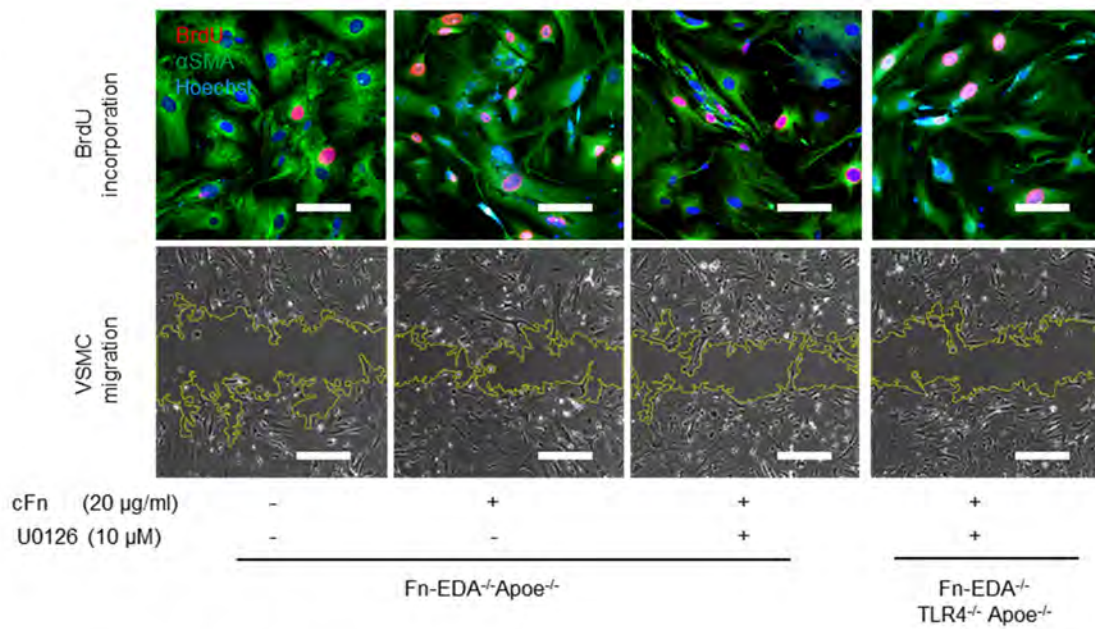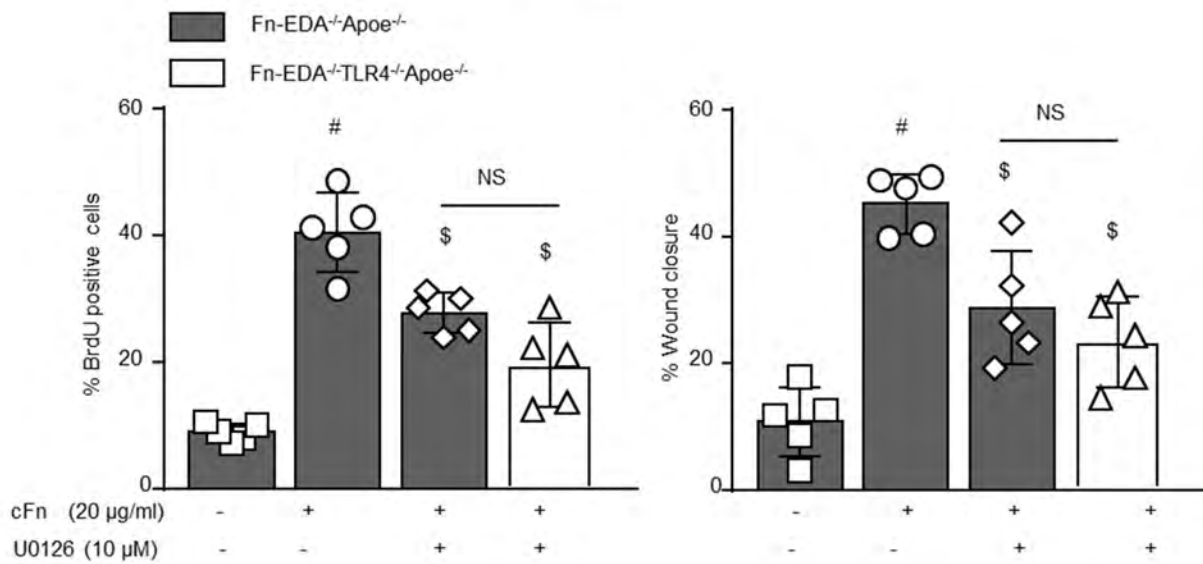

**Figure S9: cFn promotes ERK dependent SMC proliferation and migration.** Quiescent SMCs from Fn-EDA<sup>-/-</sup>Apoe<sup>-/-</sup> were used **(A)** Cells were stimulated with PDGF-BB (20 ng/mL) for indicated time points and cells were processed for Western blotting. Representative Immunoblots and densitometric analysis of p-ERK 1/2, ERK 1/2 and  $\beta$ -actin (N=4/group). **(B)** Cells were pretreated with ERK inhibitor (U0126, 10  $\mu$ M) for 30 minutes and then stimulated with either cFn-EDA (20  $\mu$ g/ml) or plasma Fn lacking EDA (20  $\mu$ g/ml) for 24 hours. The upper panel shows representative images of SMC proliferation and migration. The bottom panels show quantification (N=5/group). Values are expressed as mean  $\pm$  SEM. Statistical analysis: One way ANOVA with Bonferroni post hoc test. \*P<0.05 vs. 0 hours, #p<0.05 vs. untreated EDA<sup>-/-</sup>Apoe<sup>-/-</sup> cells, <sup>\$</sup>P<0.05 vs. cFn-EDA stimulated cells. Scale bar, BrdU assay, 50  $\mu$ m; migration assay, 500  $\mu$ m. NS= Not significant.

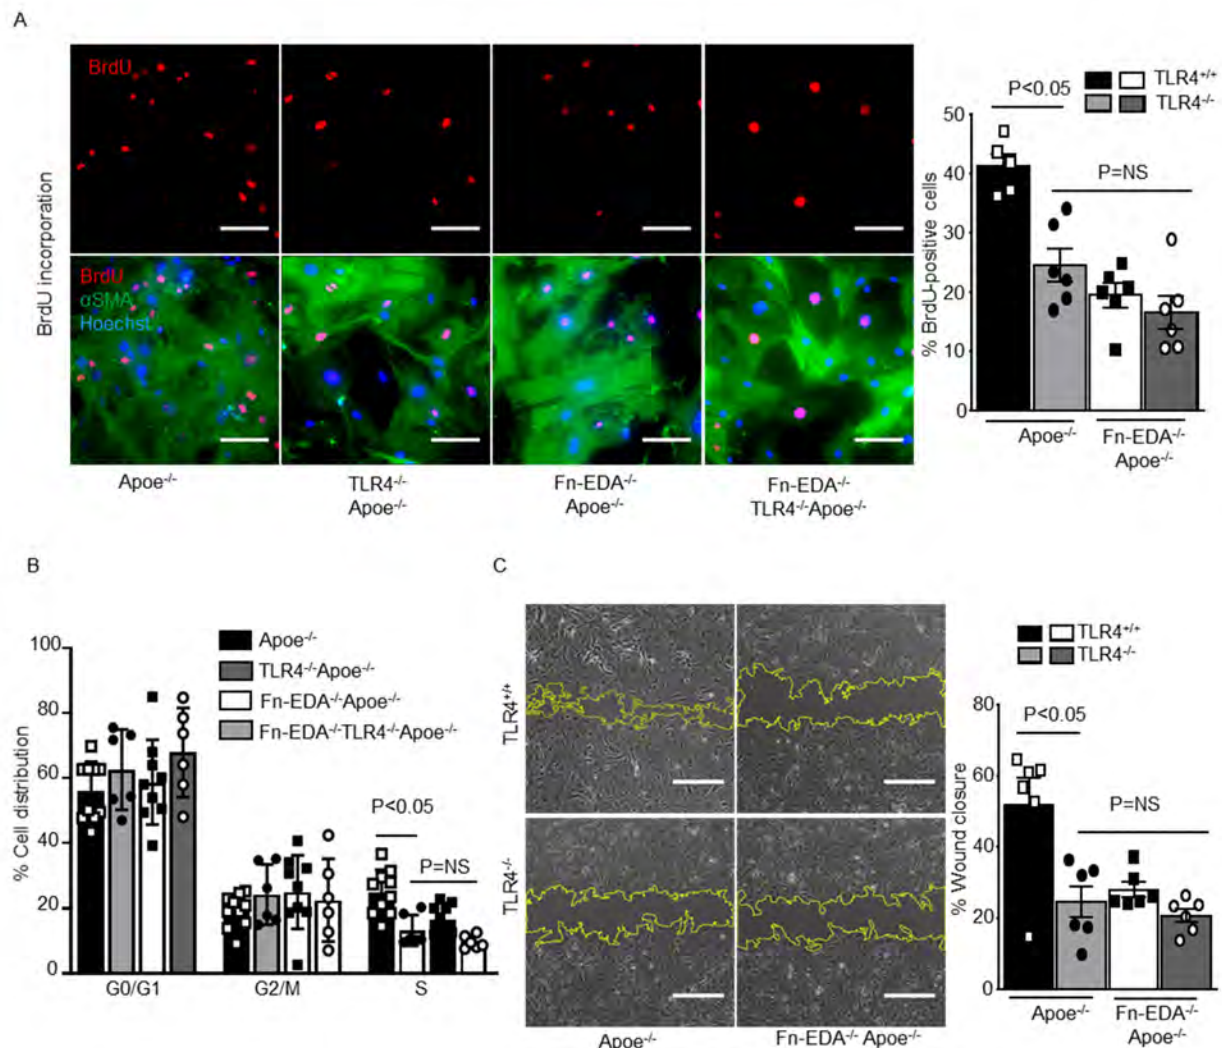

**Figure S10: Fn-EDA promotes TLR4-dependent SMC proliferation.** Quiescent SMCs from each genotype were stimulated with PDGF-BB for 24 hours. **(A)** The left panels show representative images of BrdU incorporation in SMCs. N=5-6/group. Scale bar: 50  $\mu$ m. Right panel shows quantification of percent BrdU positive cells. **(B)** Bar diagram represents cell phase distribution in PDGF-BB stimulated SMCs from different genotypes (N=7-10). **(C)** The left panels show representative phase-contrast images of SMC migration in the scratch assay. The right panel shows quantification of the migrated area (N=6-8/group). Scale bar: 500  $\mu$ m. Values are expressed as mean  $\pm$  SEM. Statistical analysis: one way ANOVA with Bonferroni post hoc test. NS= Not significant.

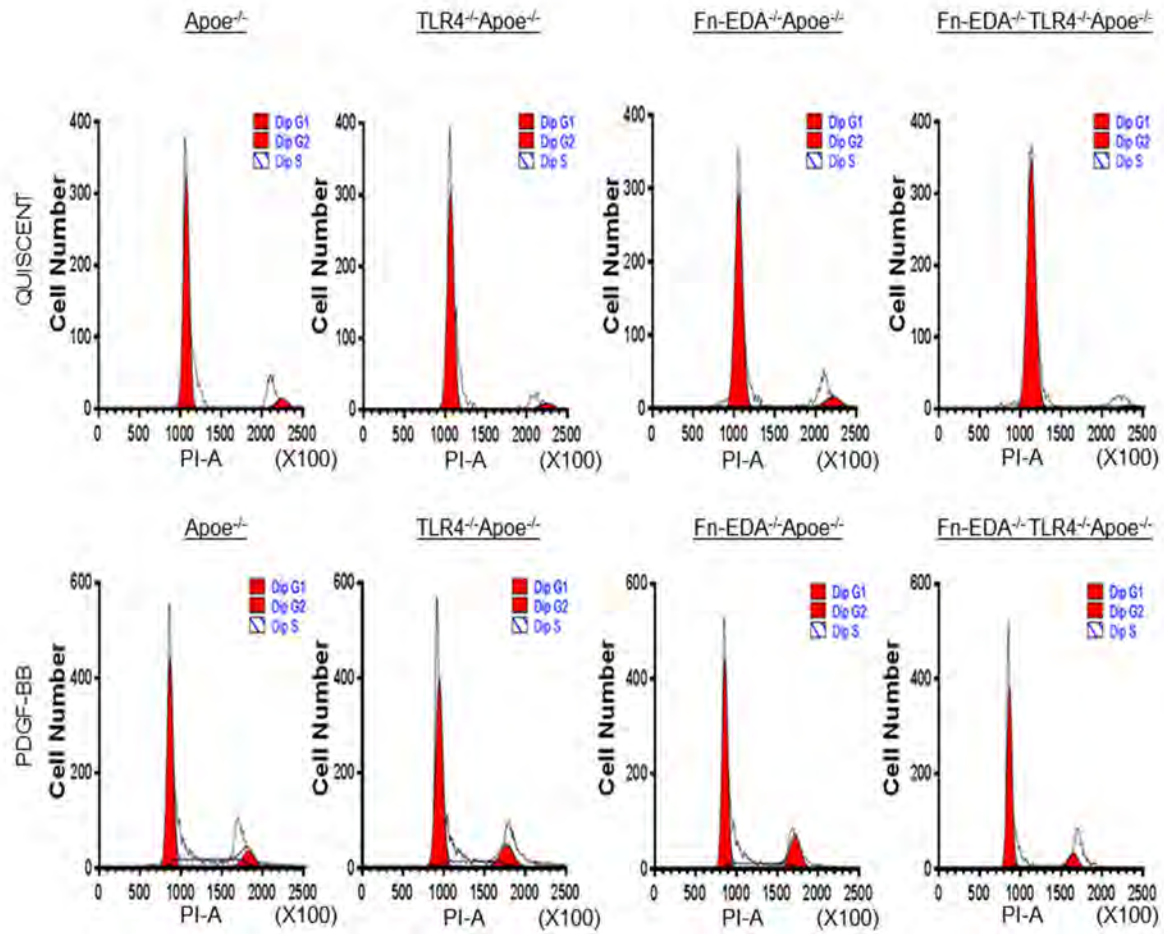

**Figure S11: Cell cycle histograms.** Serum-starved SMCs were stimulated with PDGF-BB for 24 hours. Representative DNA histograms of propidium iodide fluorescence in cells assessed by flow cytometry are shown.

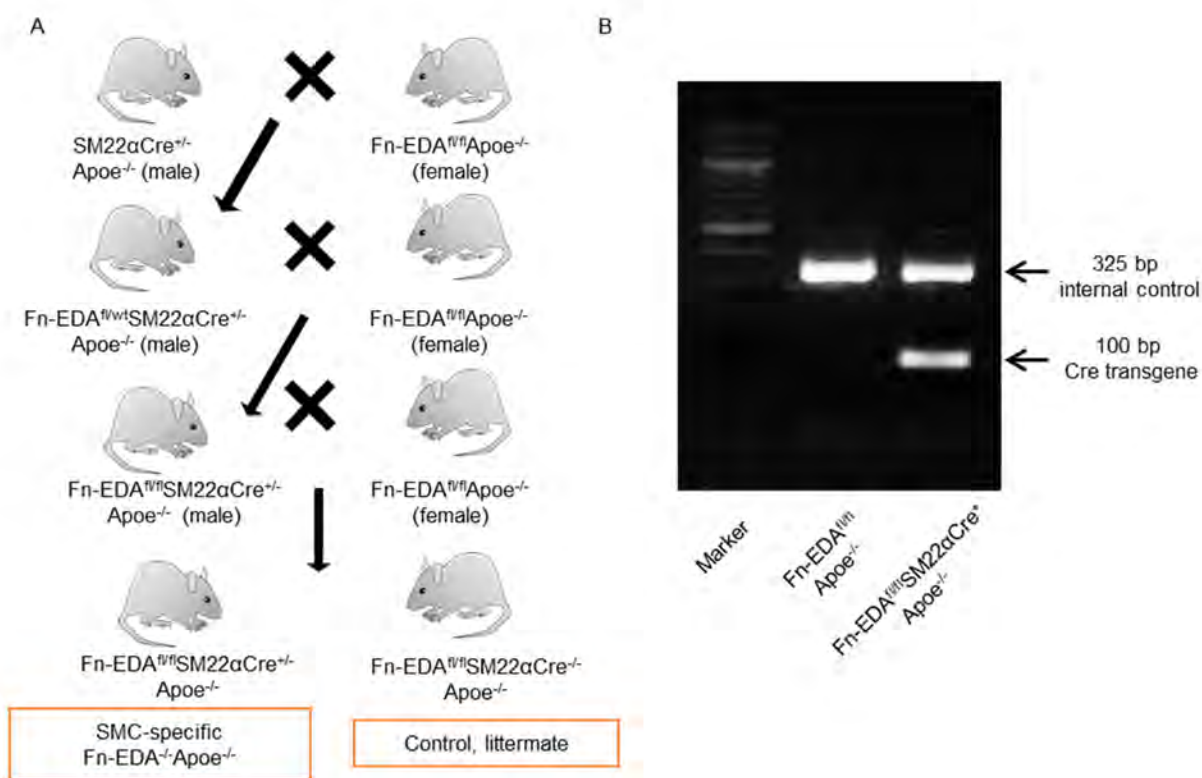

**Figure S12. SMC-specific Fn-EDA deficient mice.** (A) Schematic showing the strategy to generate SMC-specific Fn-EDA deficient mice. (B) Genomic PCR showing the presence of SM22 $\alpha$ Cre gene in Fn-EDA<sup>fl/fl</sup> Apoe<sup>-/-</sup> mice.



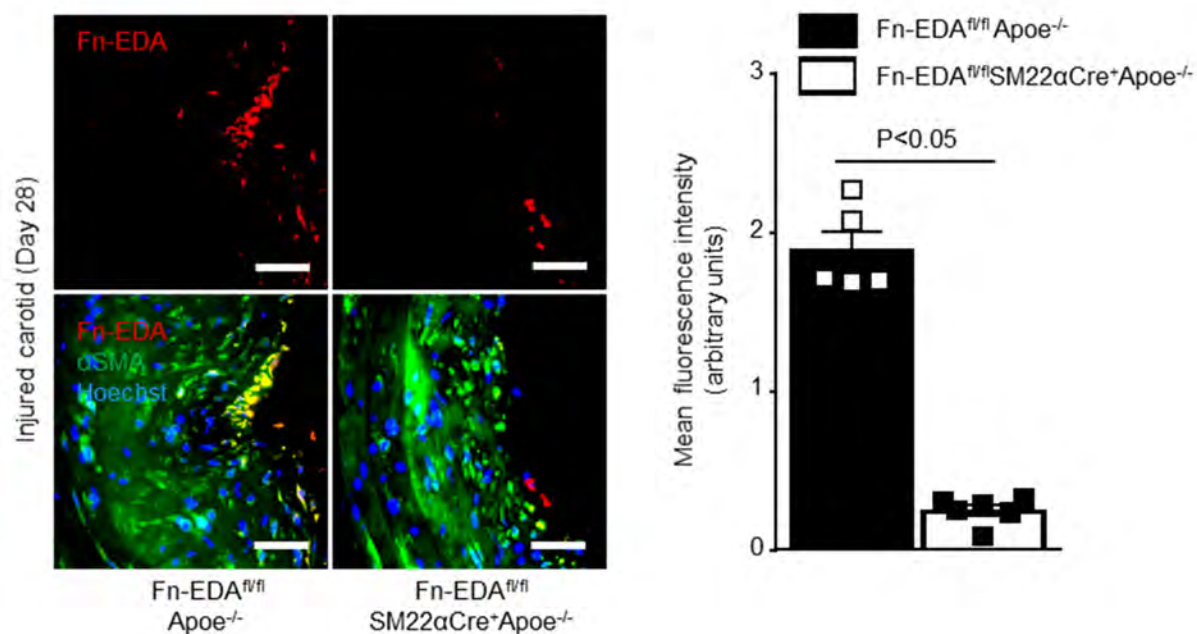

**Figure S13.** The left panels show representative double immunostaining for Fn-EDA (red) and SMC (green) in carotid artery sections of *Fn-EDA<sup>fl/fl</sup>Apoe<sup>-/-</sup>* and *Fn-EDA<sup>fl/fl</sup>SM22 $\alpha$ Cre<sup>+</sup>Apoe<sup>-/-</sup>* mice harvested after 28 days of wire injury. The right panel show quantification of Fn-EDA (N=5-6/group). Scale bar: 50  $\mu$ m. Values are expressed as mean  $\pm$  SEM. Statistical analysis: unpaired student t test.

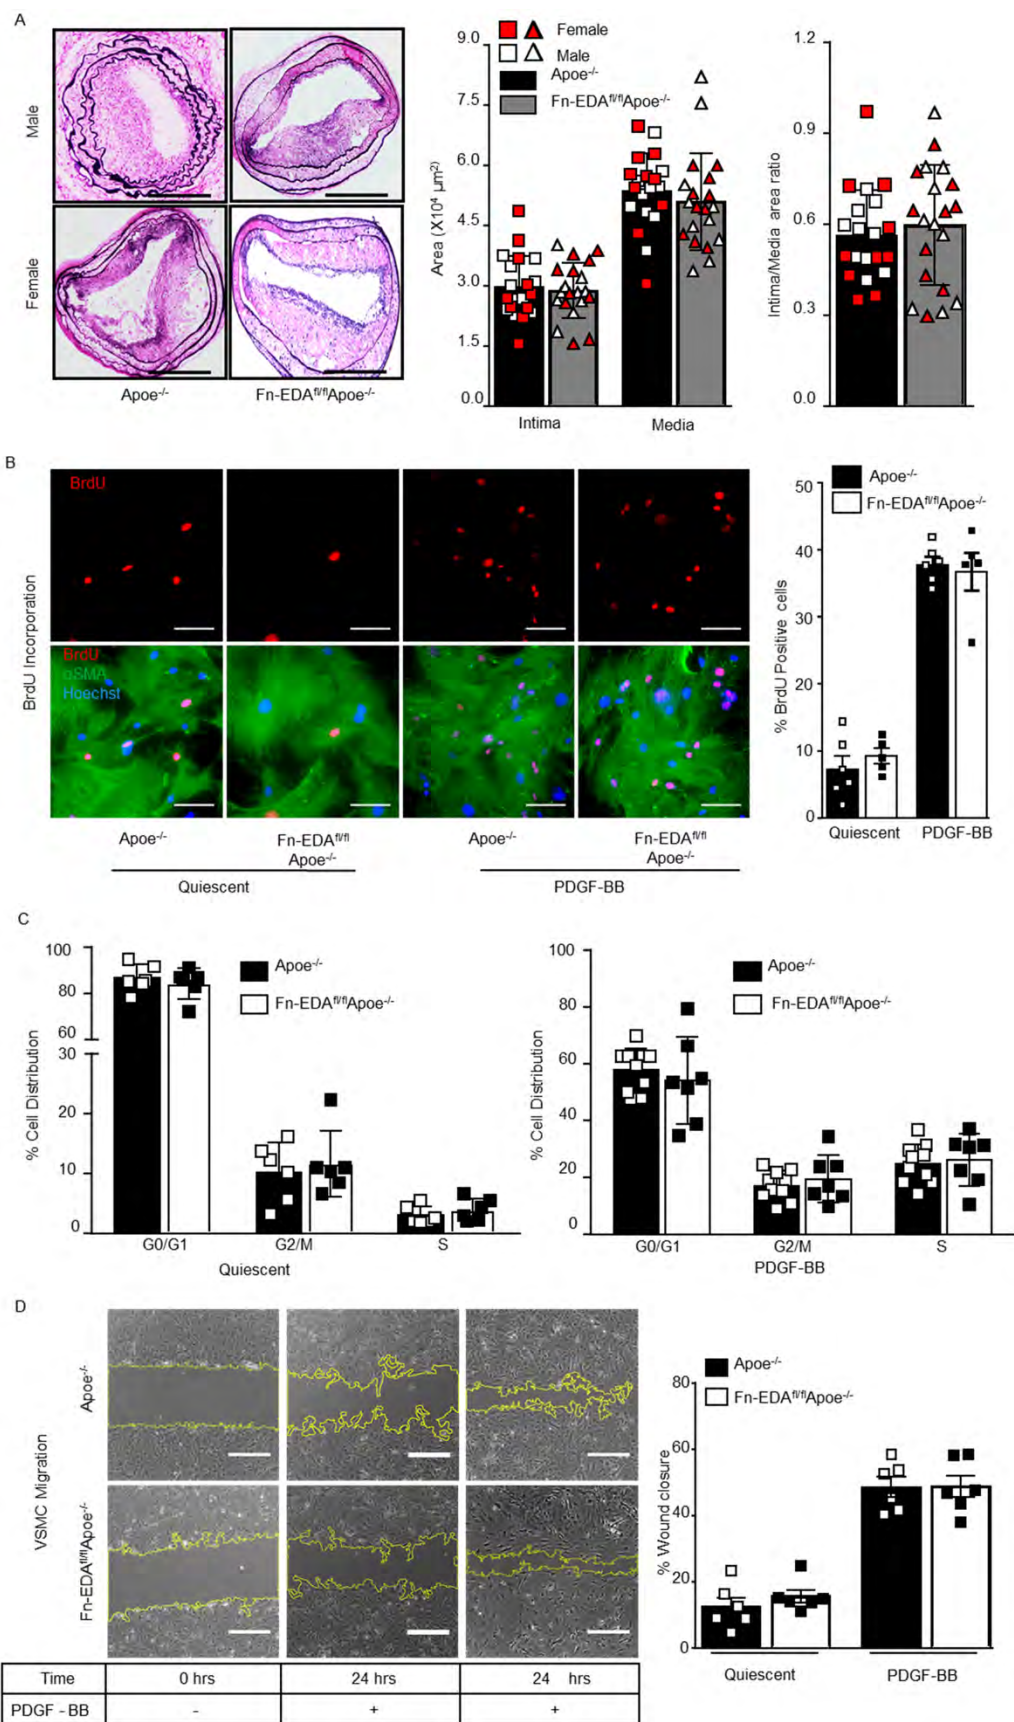



**Figure S14. Constitutive expression of Fn-EDA does not further promote intimal hyperplasia.** (A) Representative photomicrographs of Verhoeff's Van Gieson stained carotid artery sections of and Fn-EDA<sup>fl/fl</sup>Apoe<sup>-/-</sup> mice and Apoe<sup>-/-</sup> mice after 28 days of injury (N=10/group). Right panel is showing quantification of intima area, media area and a ratio of intima to the media area. Each dot represents a single mouse. (B) Representative images and quantification of BrdU-positive cells (red) co-stained with  $\alpha$ SMA (green) and Hoechst (blue). Scale bar: 50  $\mu$ m. (C) Quiescent or PDGF-BB-stimulated aortic SMCs were stained with propidium iodide and cell cycle was analyzed using flow cytometry. The panels show quantitative data of cell cycle distribution in quiescent and PDGF-BB stimulated SMCs (N=6-10/group). (D) Representative phase-contrast images of SMC migration in the scratch assay. The right panel shows quantification of the migrated area (N=6-8/group). Scale bar: 500  $\mu$ m. Values are expressed as mean  $\pm$  SEM. Statistical analysis: unpaired student t-test.

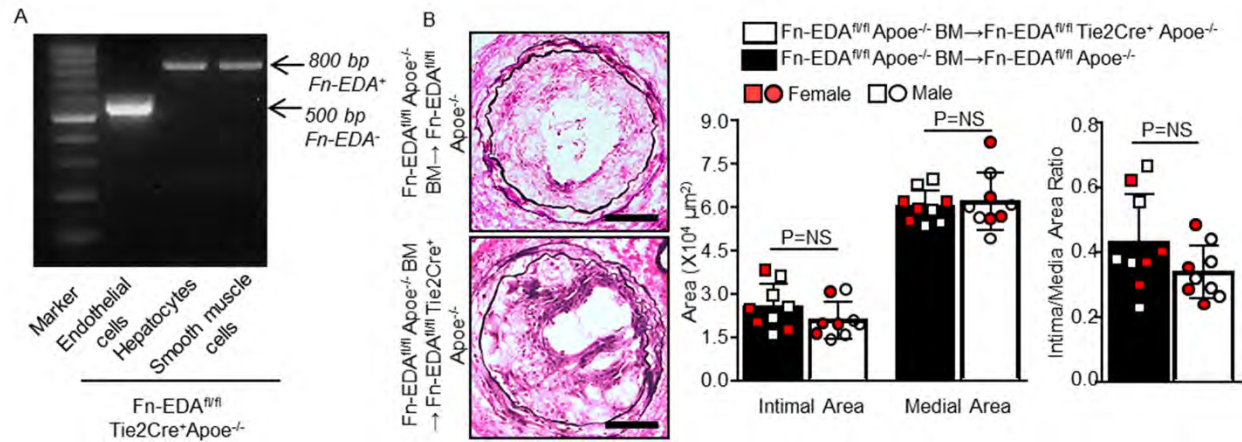

**Figure S15. Endothelial cell-specific Fn-EDA deletion does not reduce neointimal hyperplasia.** (A) RT-PCR confirmed the absence of Fn-EDA mRNA in endothelial cells but not in hepatocytes or SMCs of Fn-EDA<sup>fl/fl</sup>Tie2Cre<sup>+</sup>Apoe<sup>-/-</sup> mouse. (B) The left panels show representative photomicrographs of Verhoeff's Van Gieson stained carotid artery sections of male and female mice after 28 days of injury (N=4-5/group). Scale bar, 200 μm. The right panels (bar graphs) show quantification of intimal area, medial area and a ratio of intima to the media area. Each dot represents a single mouse. Values are expressed as mean ± SEM. Statistical analysis: unpaired student t-test. NS= Not significant.

Full unedited gel for Figure 3B-SM22α

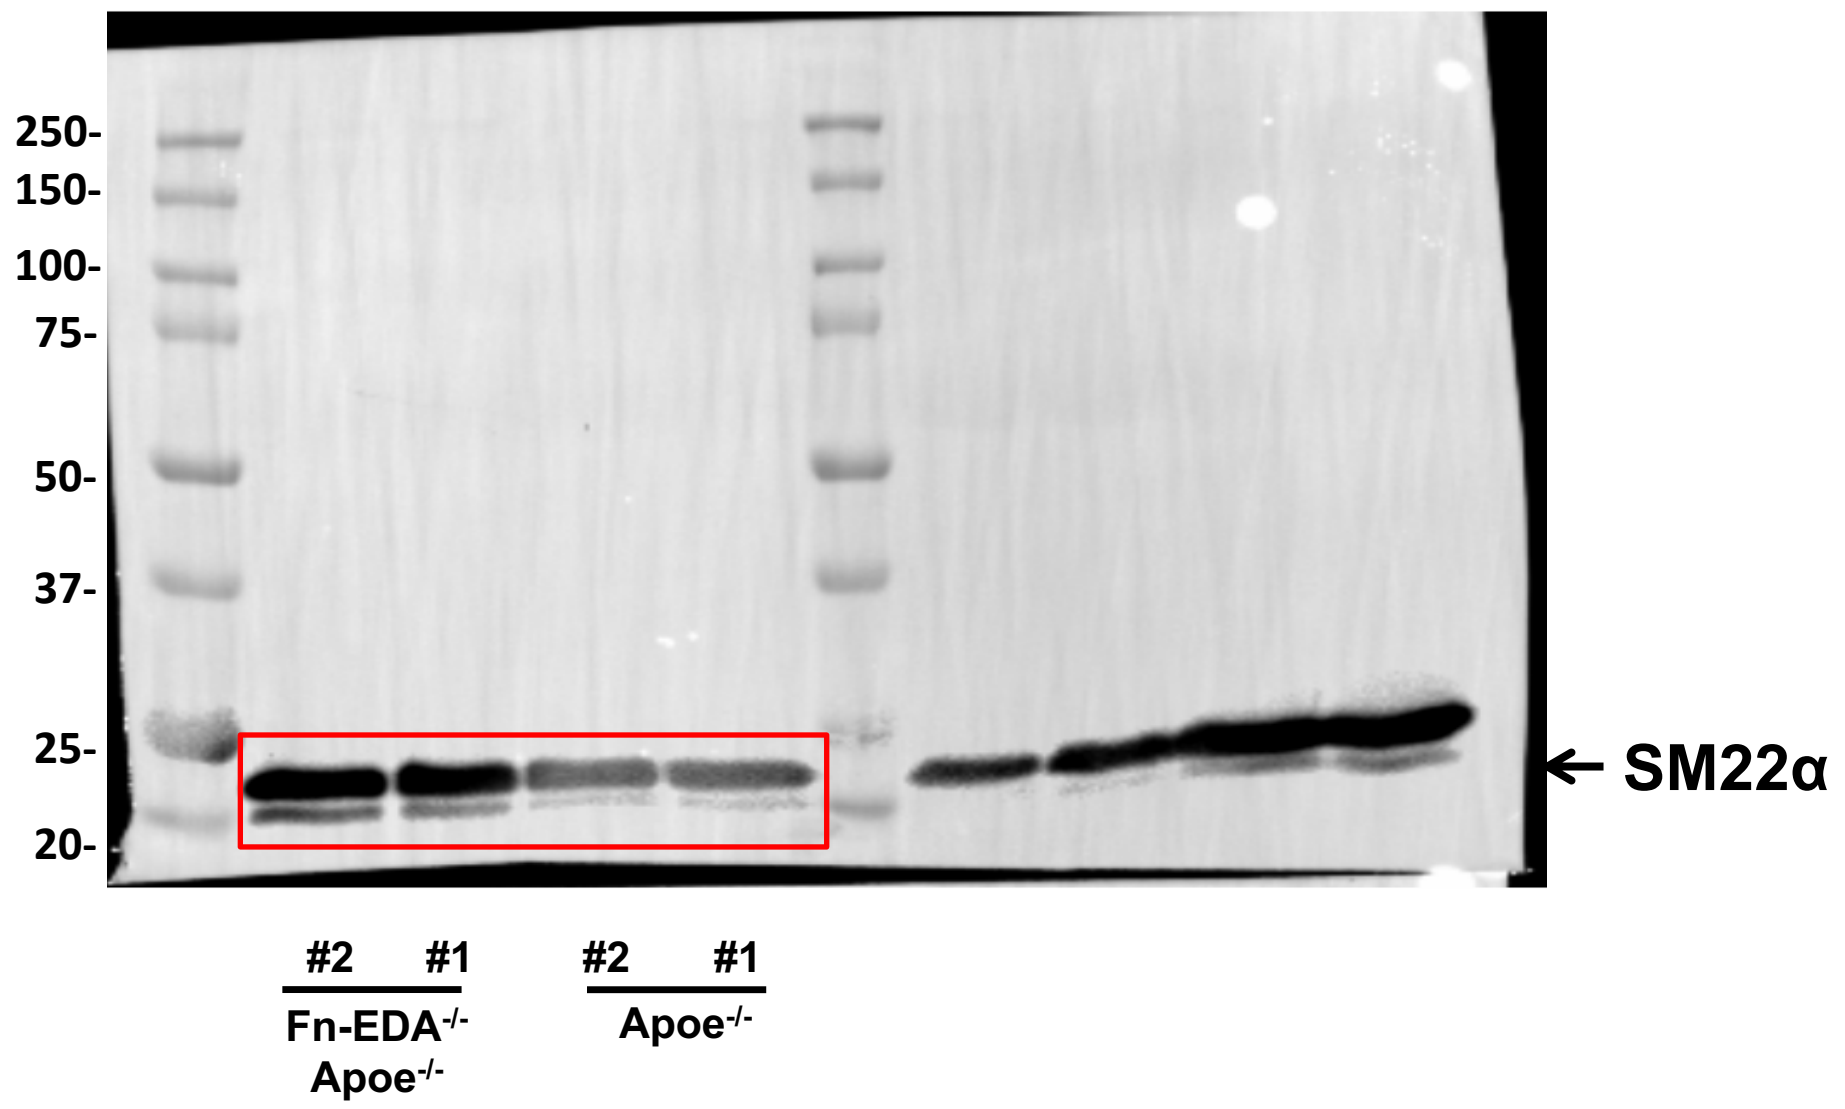

Full unedited gel for Figure 3B-SM-MHC

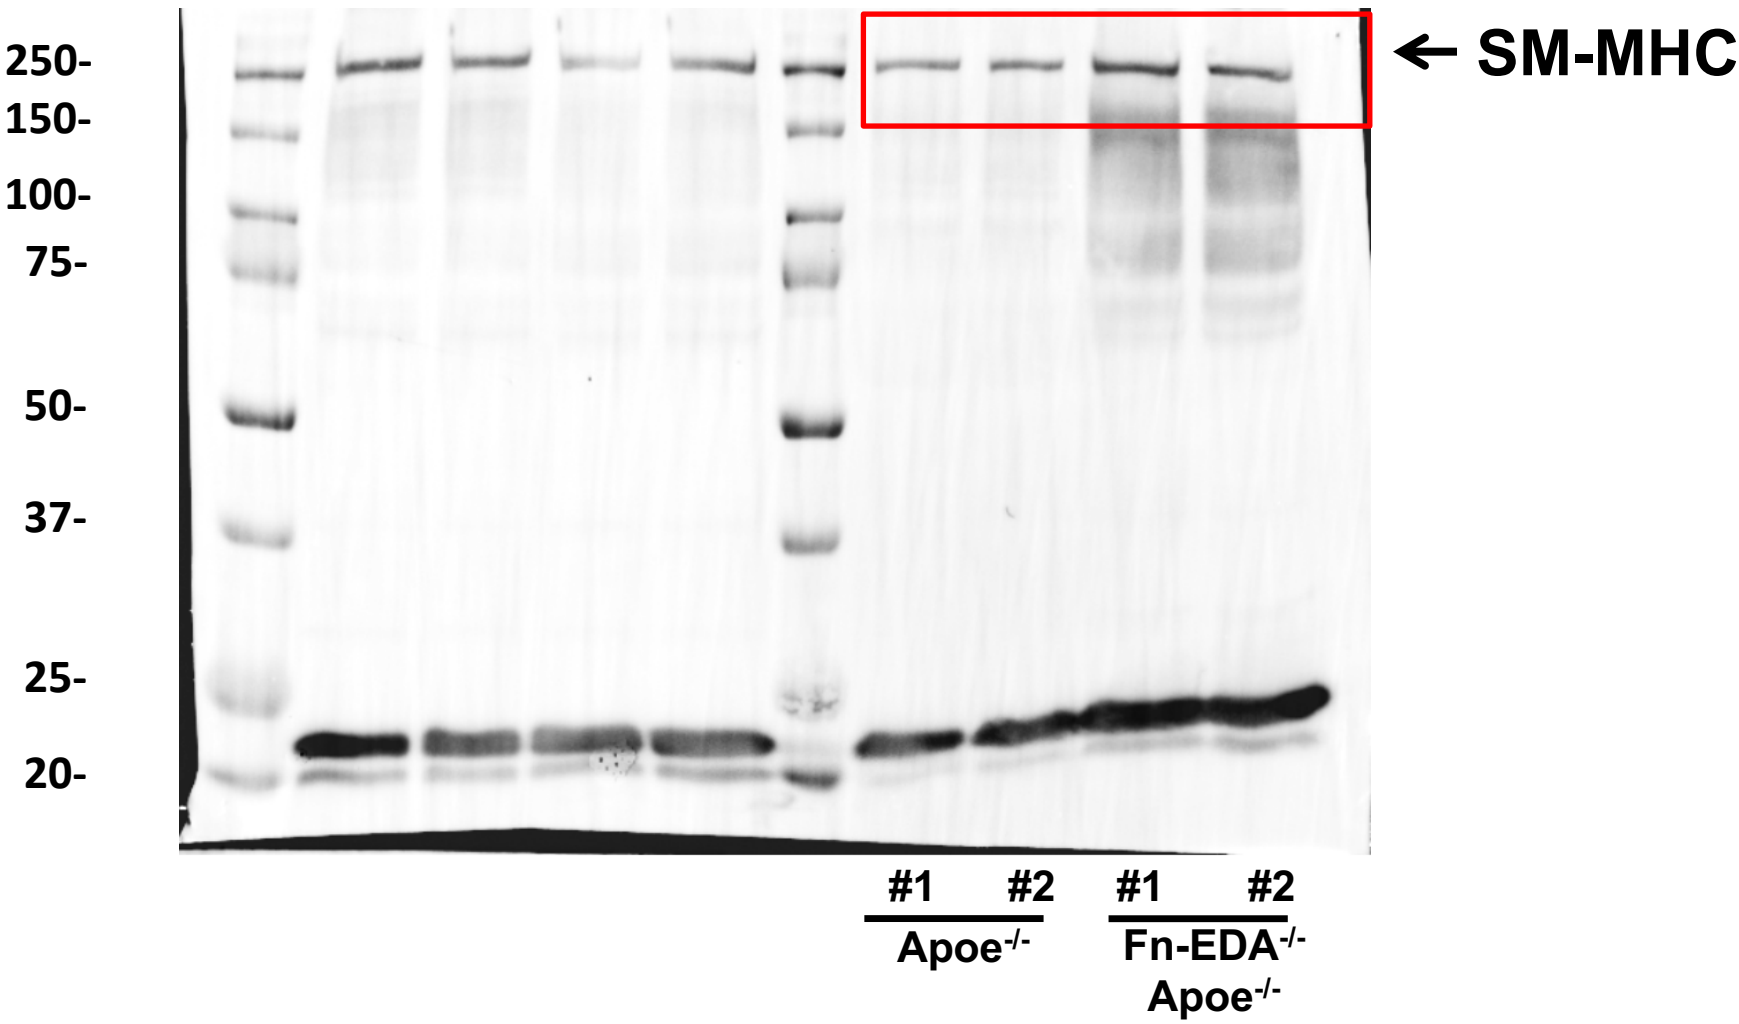

Full unedited gel for Figure 3B-Vimentin

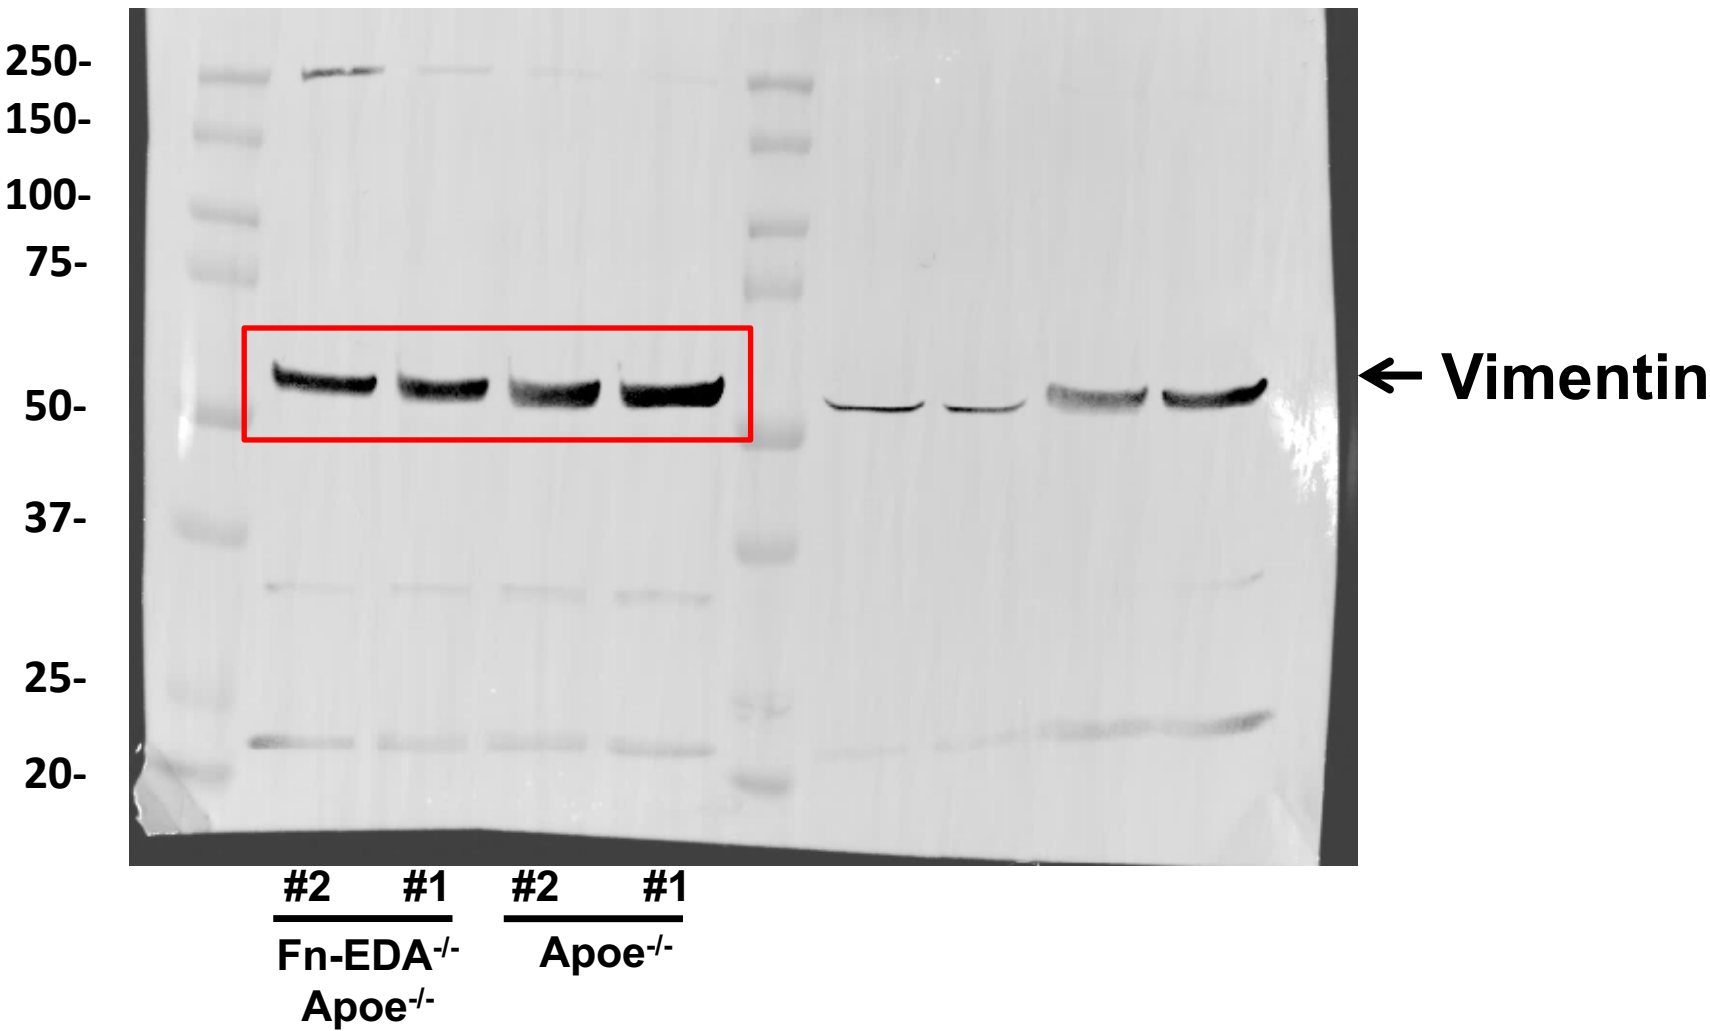

Full unedited gel for Figure 3B-β-actin

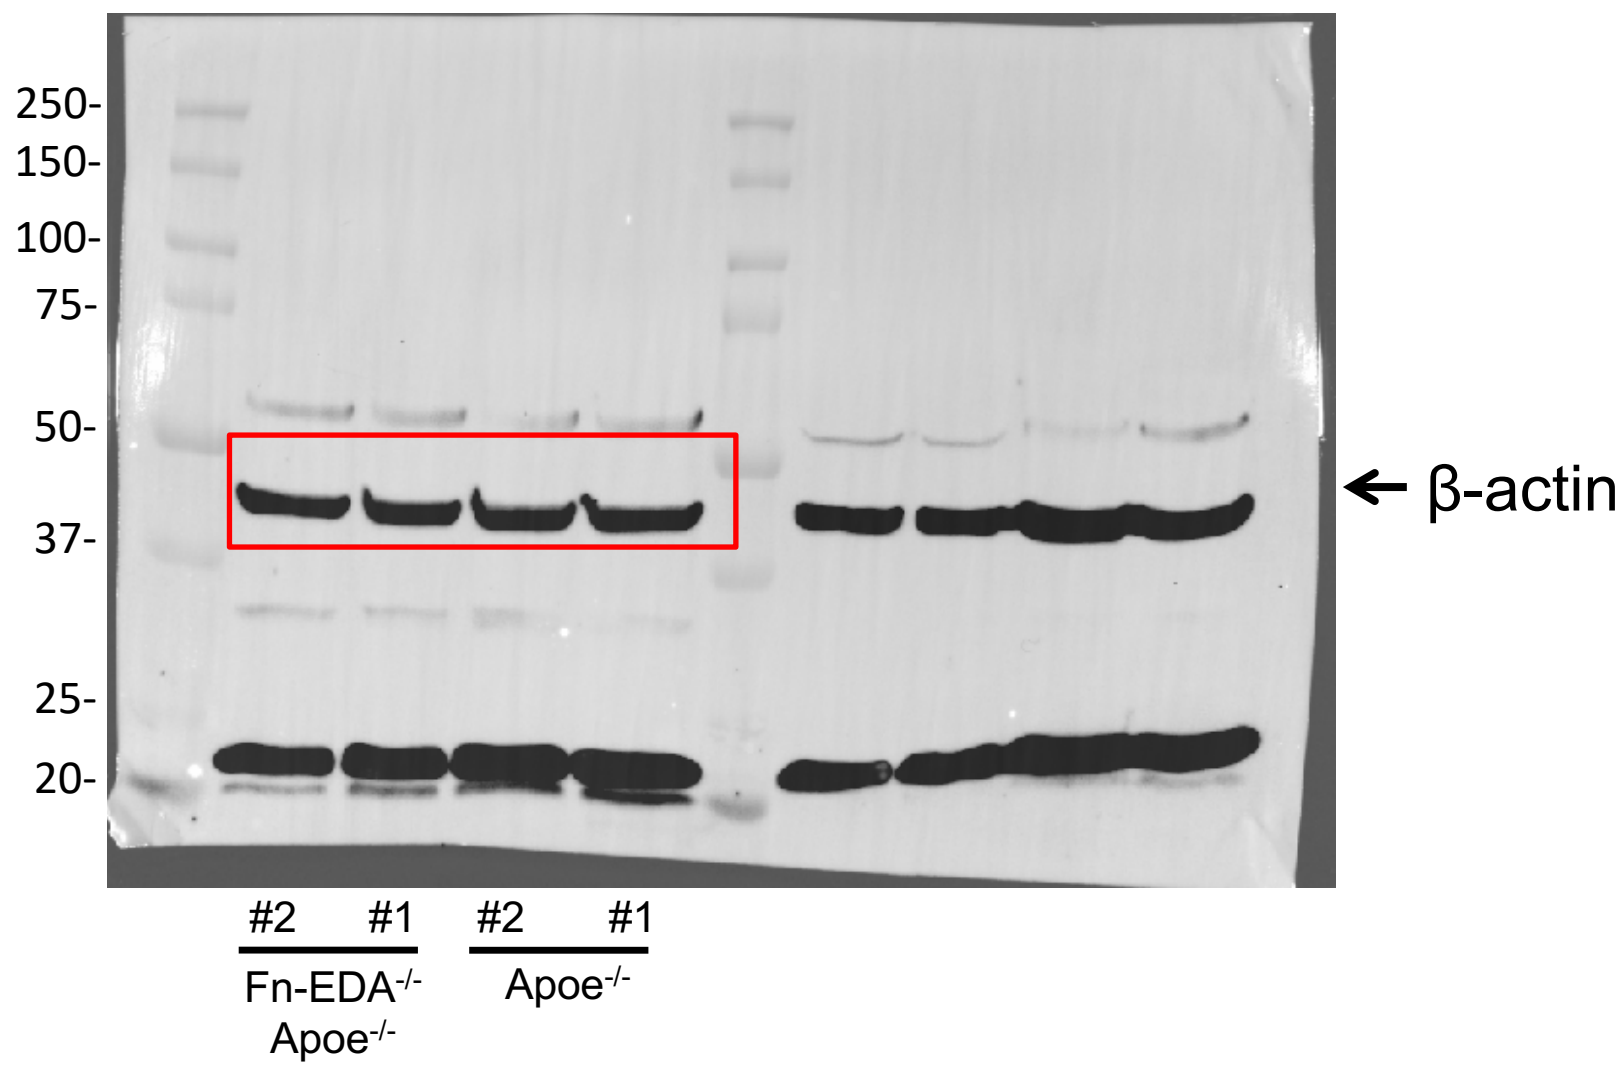

Full unedited gel for Figure 3B-Osteopontin

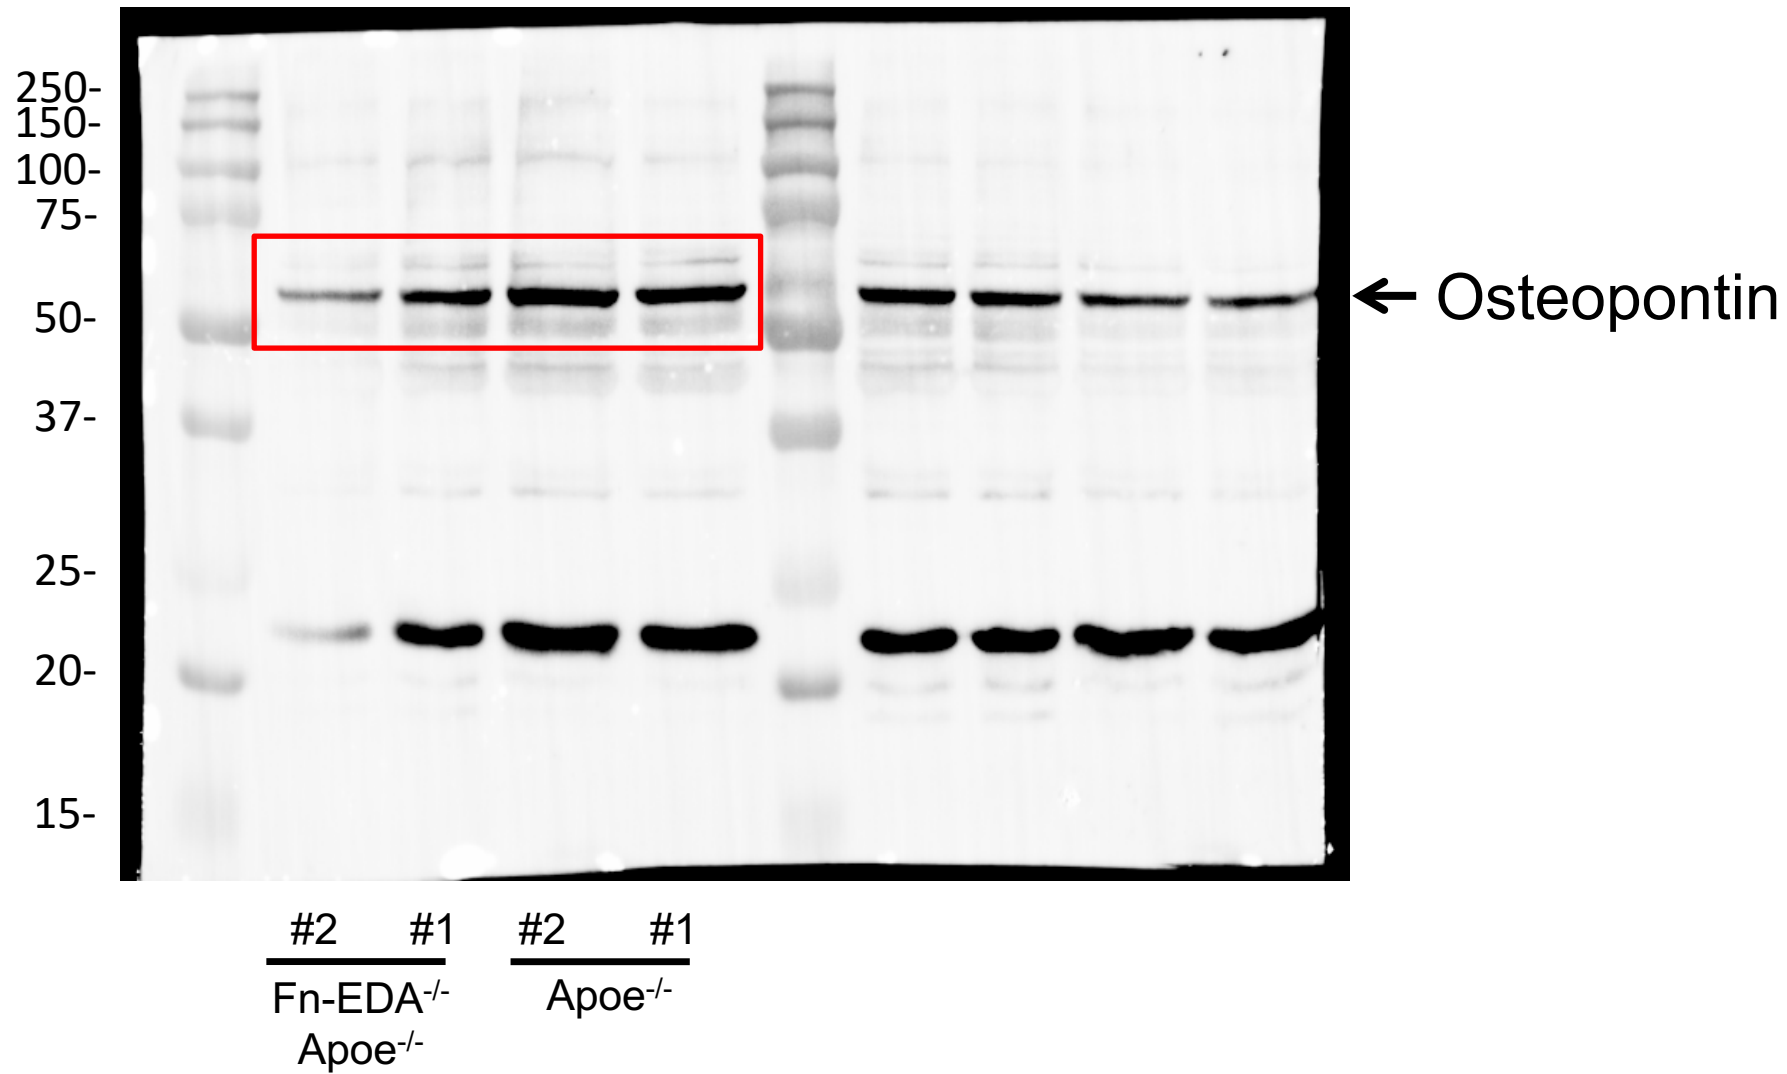

Full unedited gel for Figure 3B-β-actin

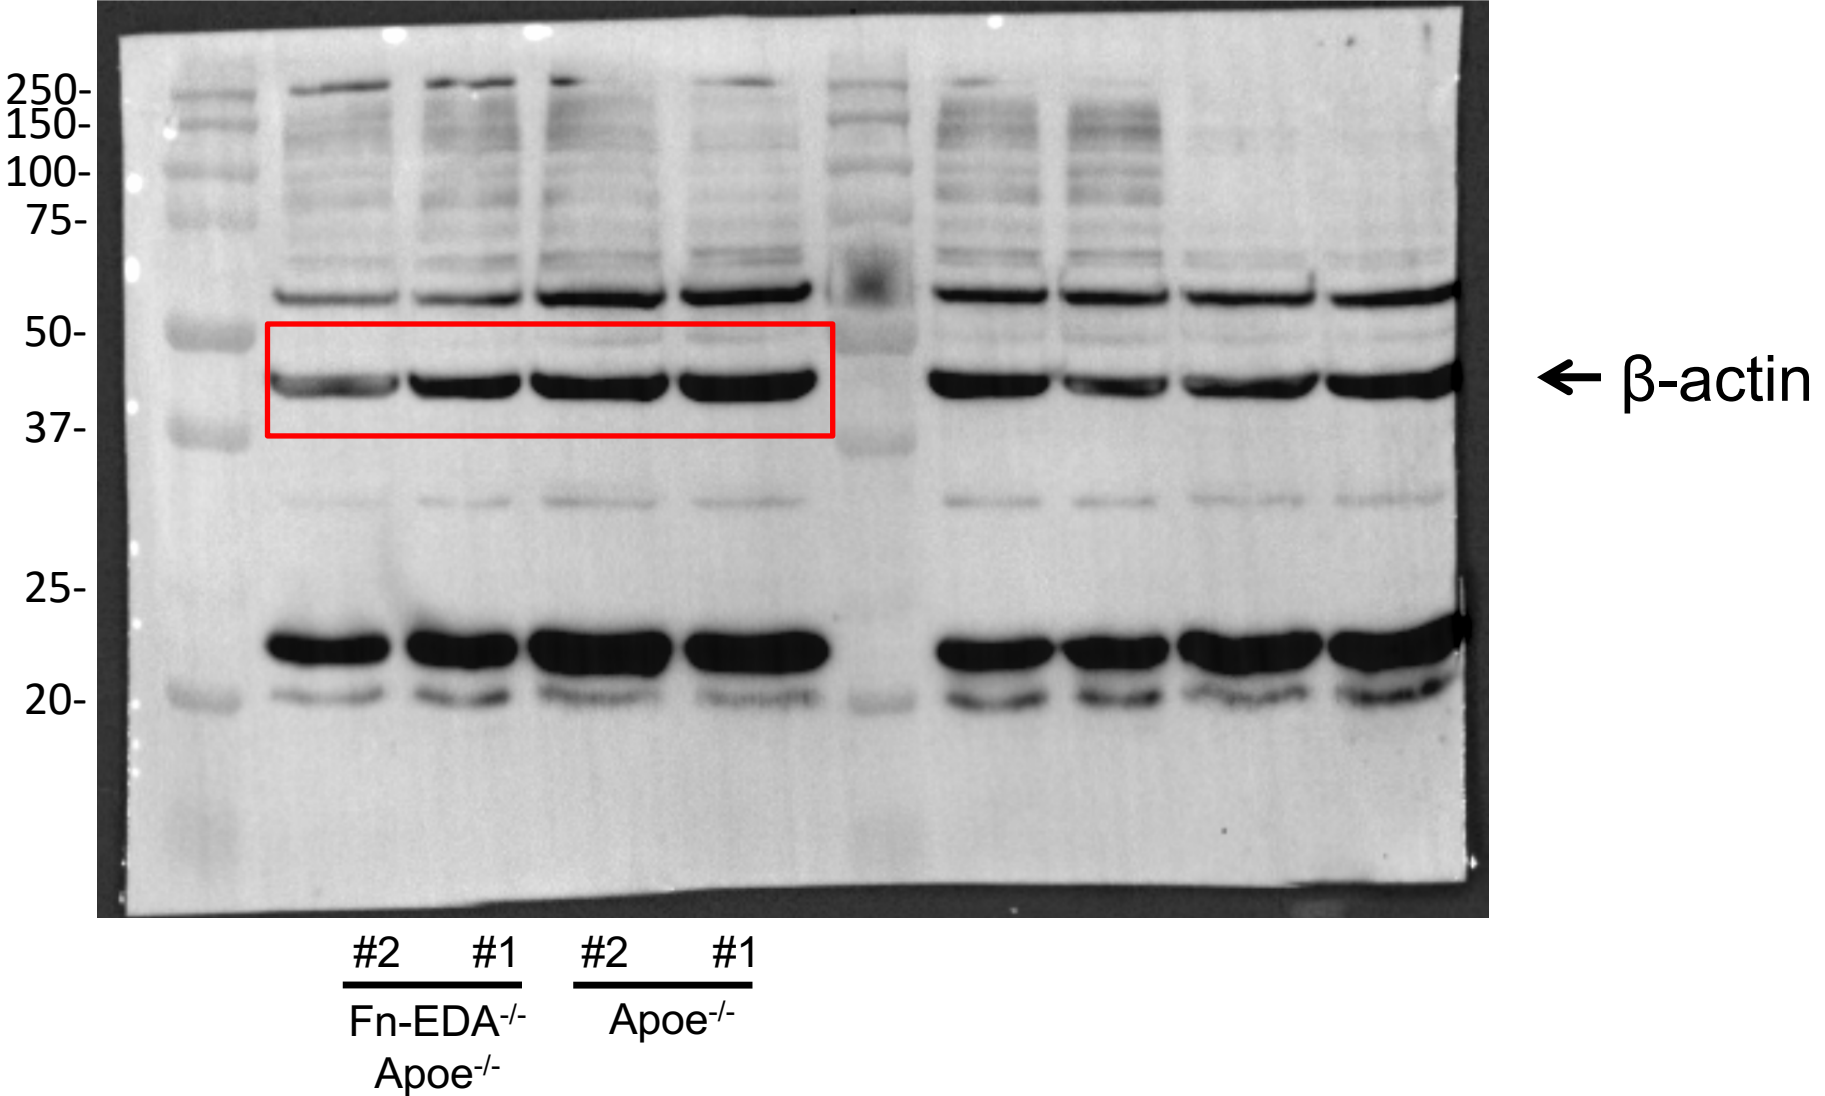



Full unedited gel for Figure 3C-p-AKT1 (left) and Total AKT1 (right)

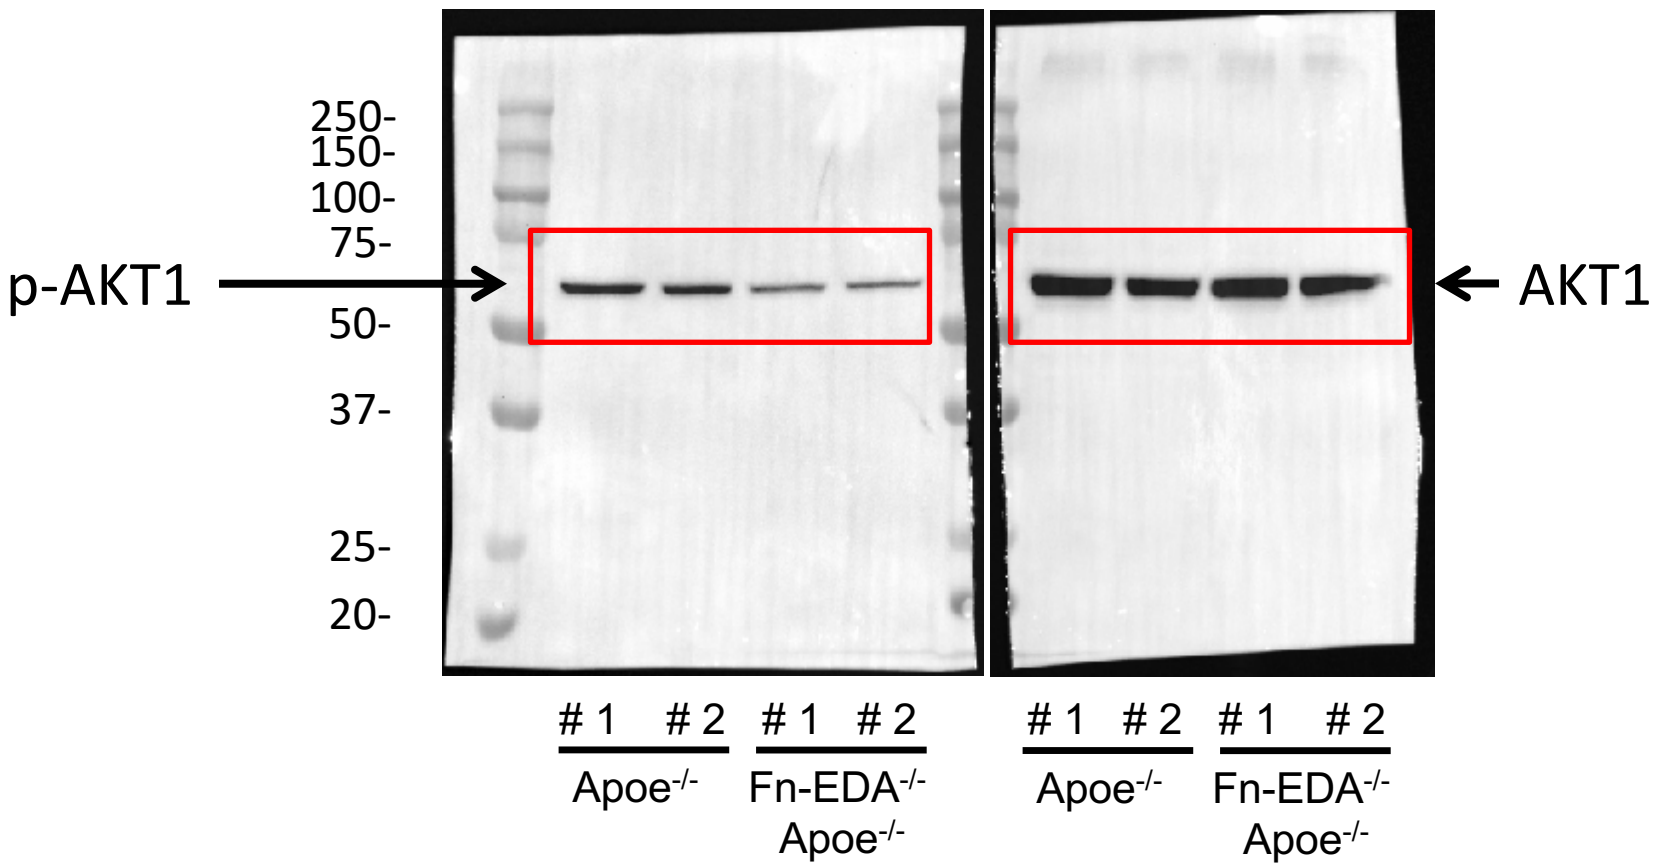

Full unedited gel for Figure 3C-p-AKT2 (left) and Total AKT2 (right)

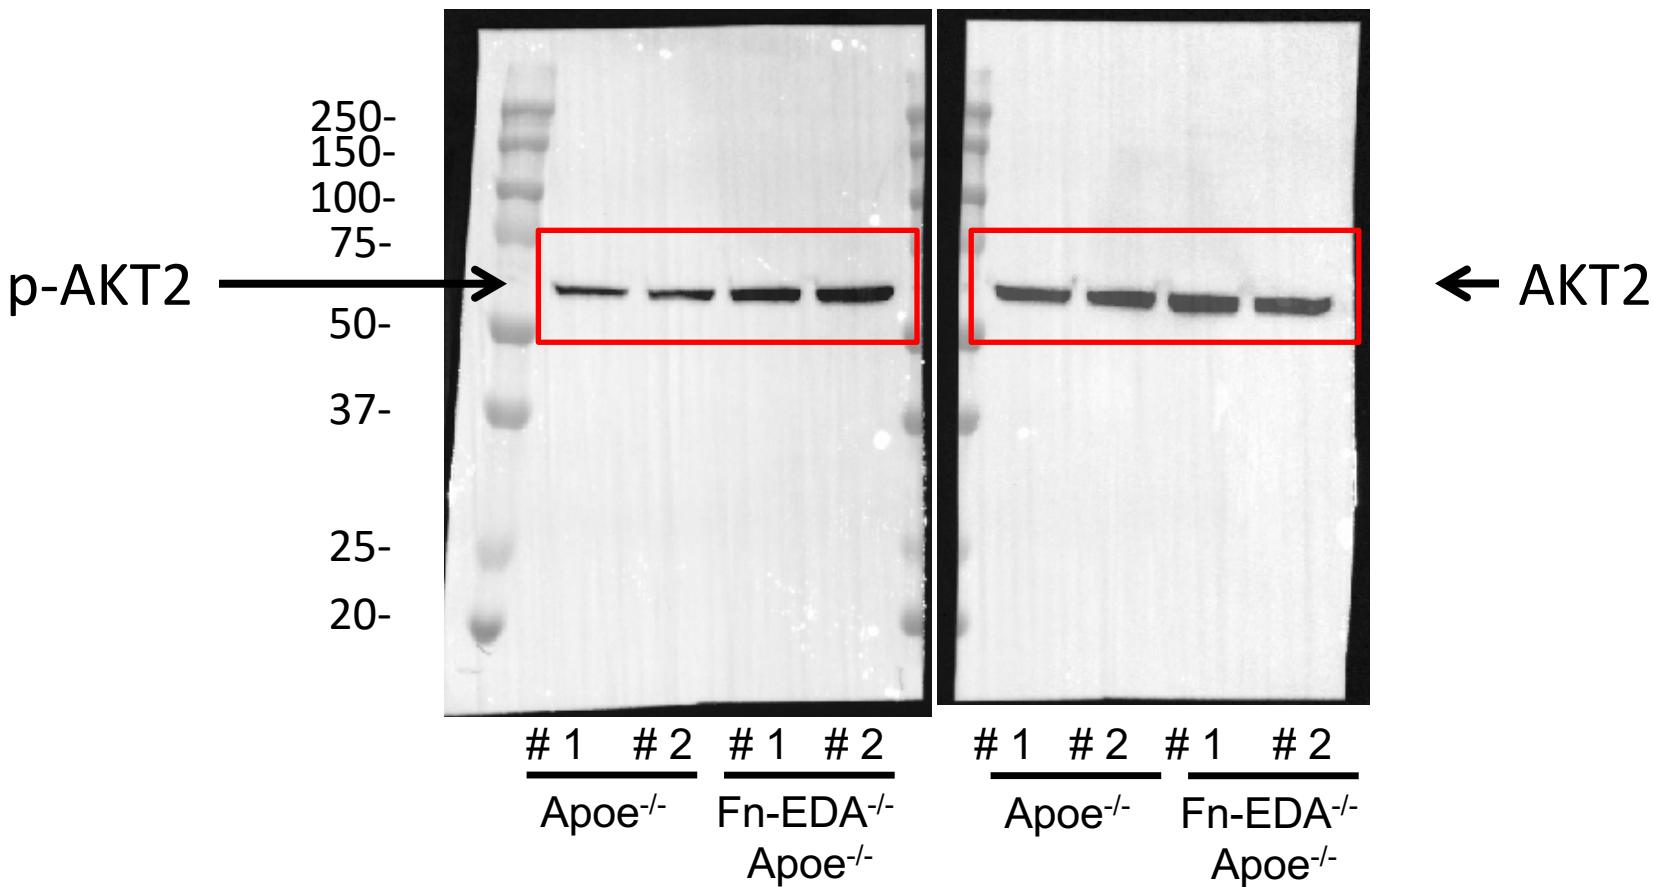

Full unedited gel for Figure 3C-p-mTOR (left) and Total mTOR (right)

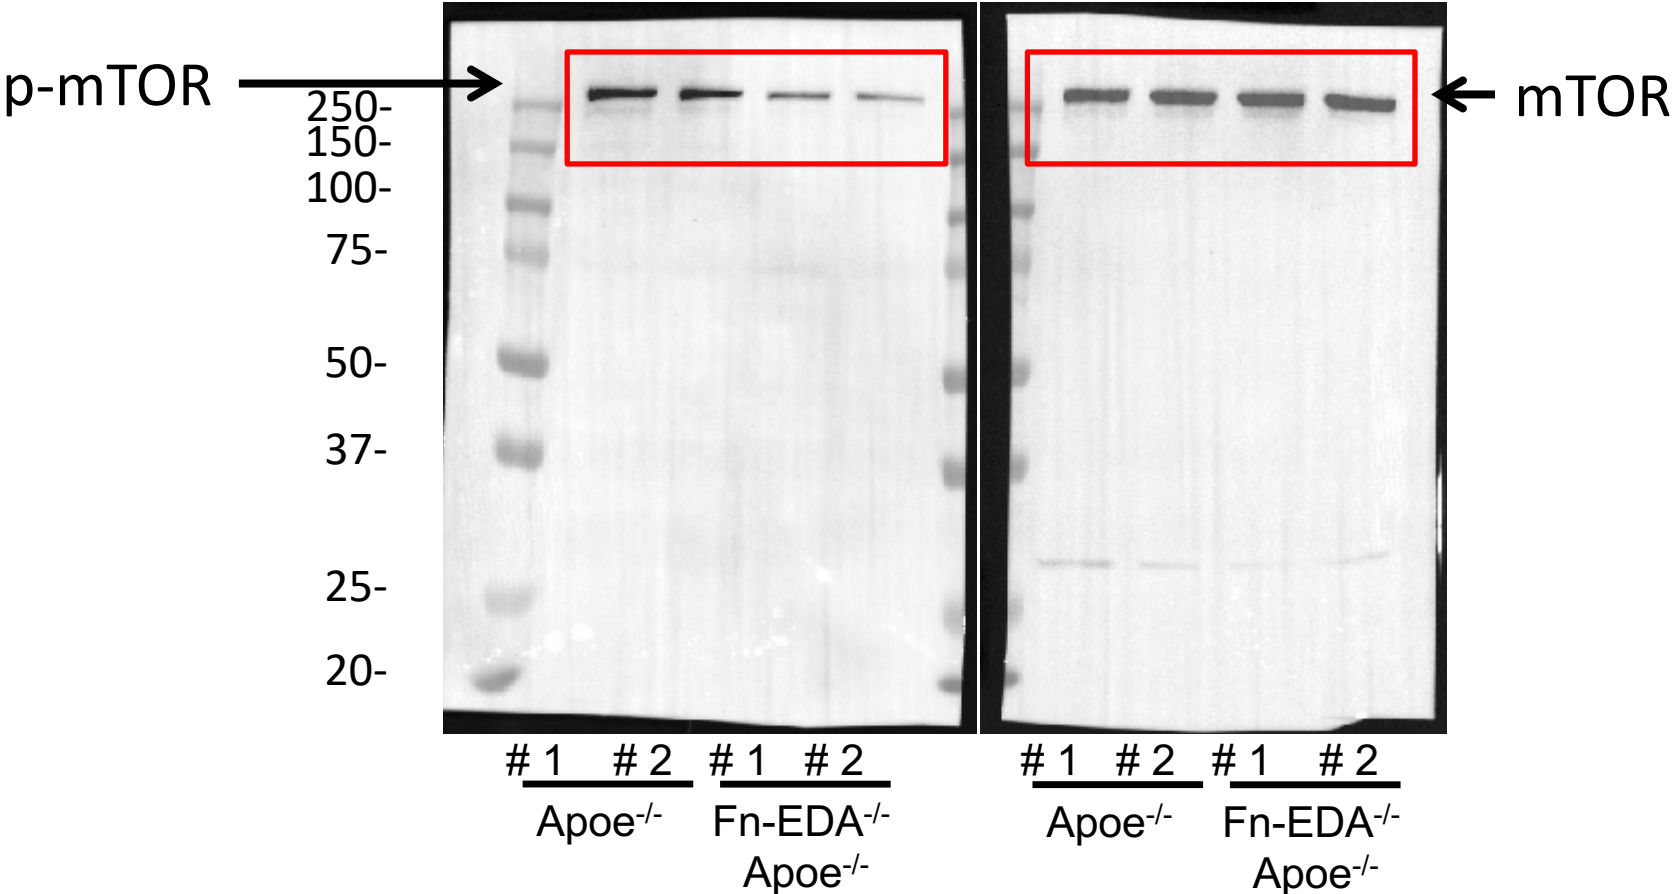

Full unedited gel for Figure 3C-p-NFκB (left) and Total NFκB (right)

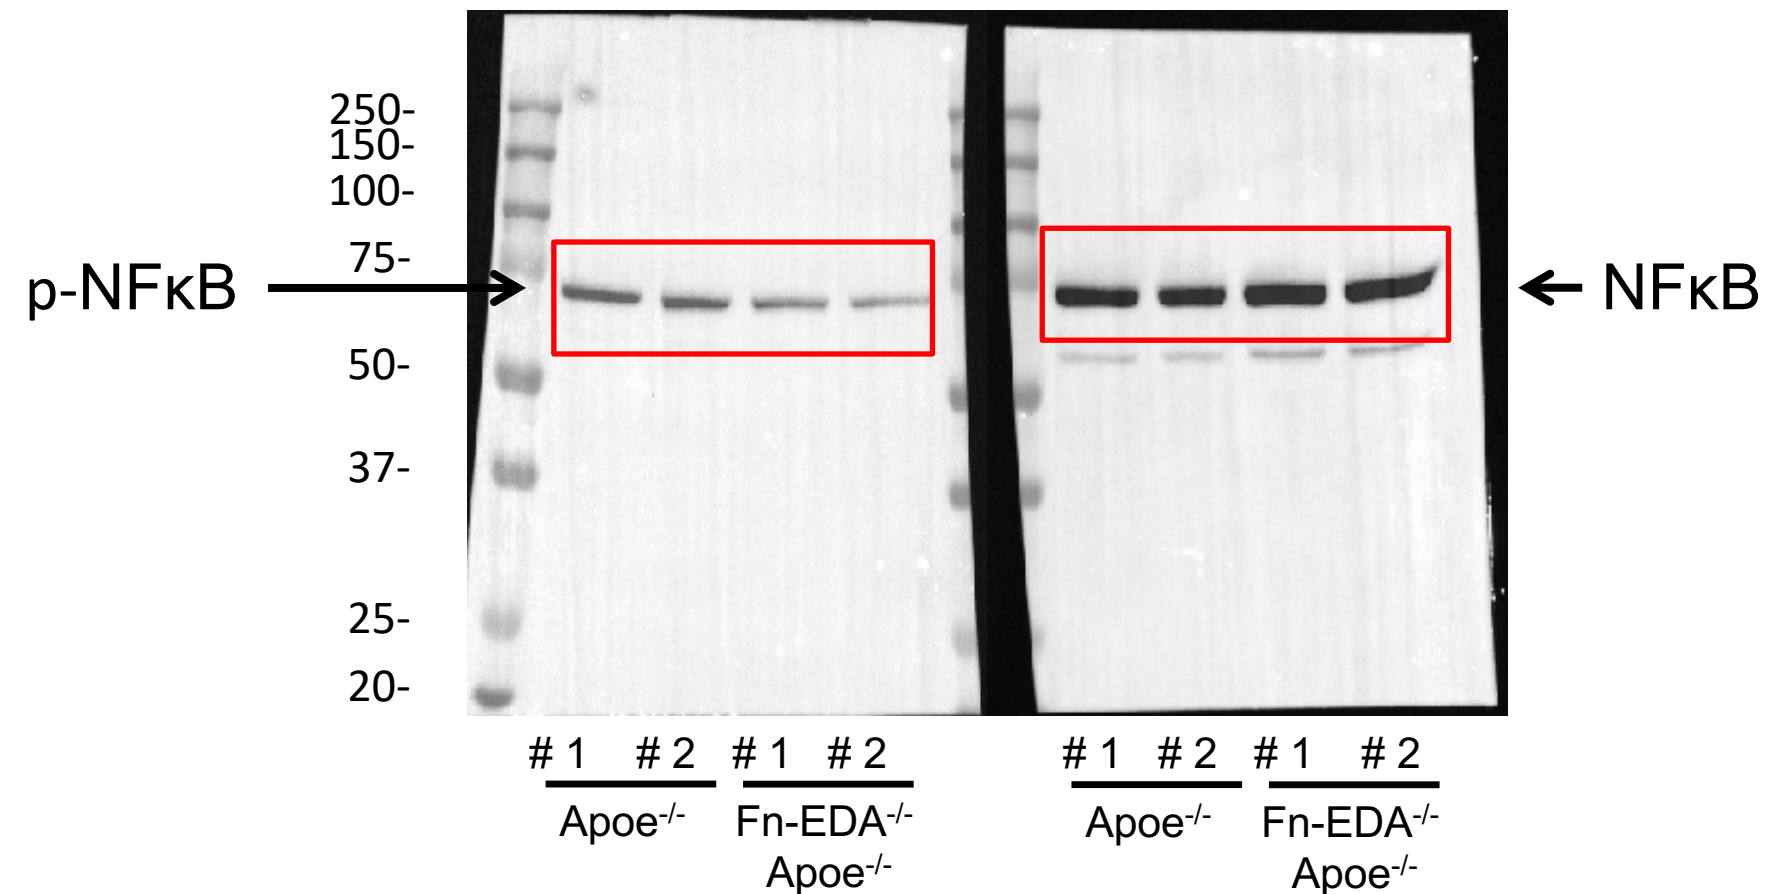

Full unedited gel for Figure 3C-β-actin

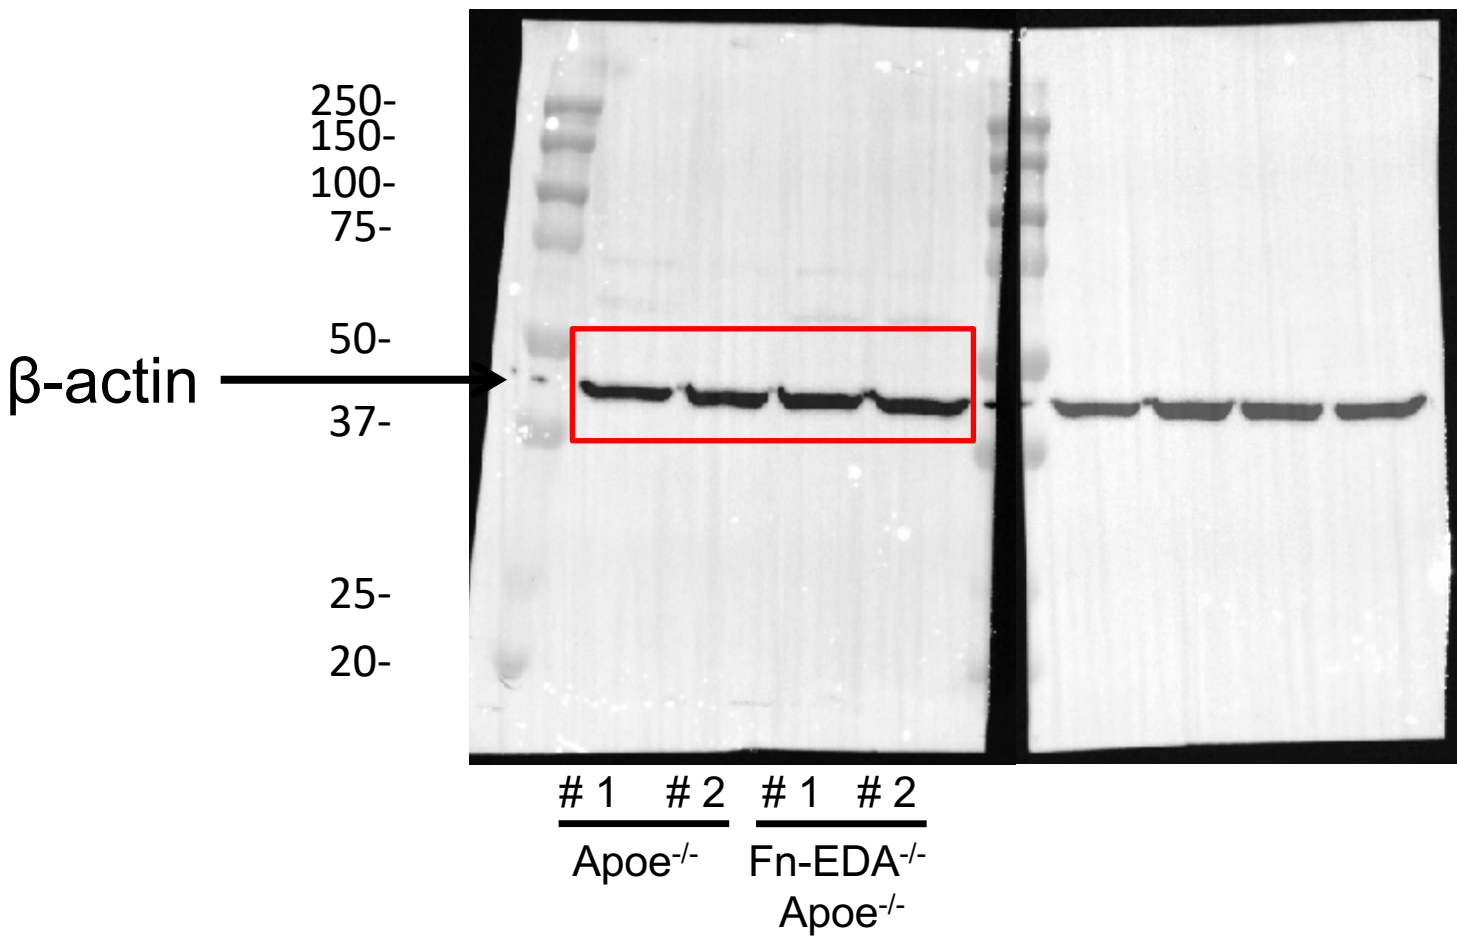

Full unedited gel for Figure 4A-p-AKT1 (left) and Total AKT1 (right)

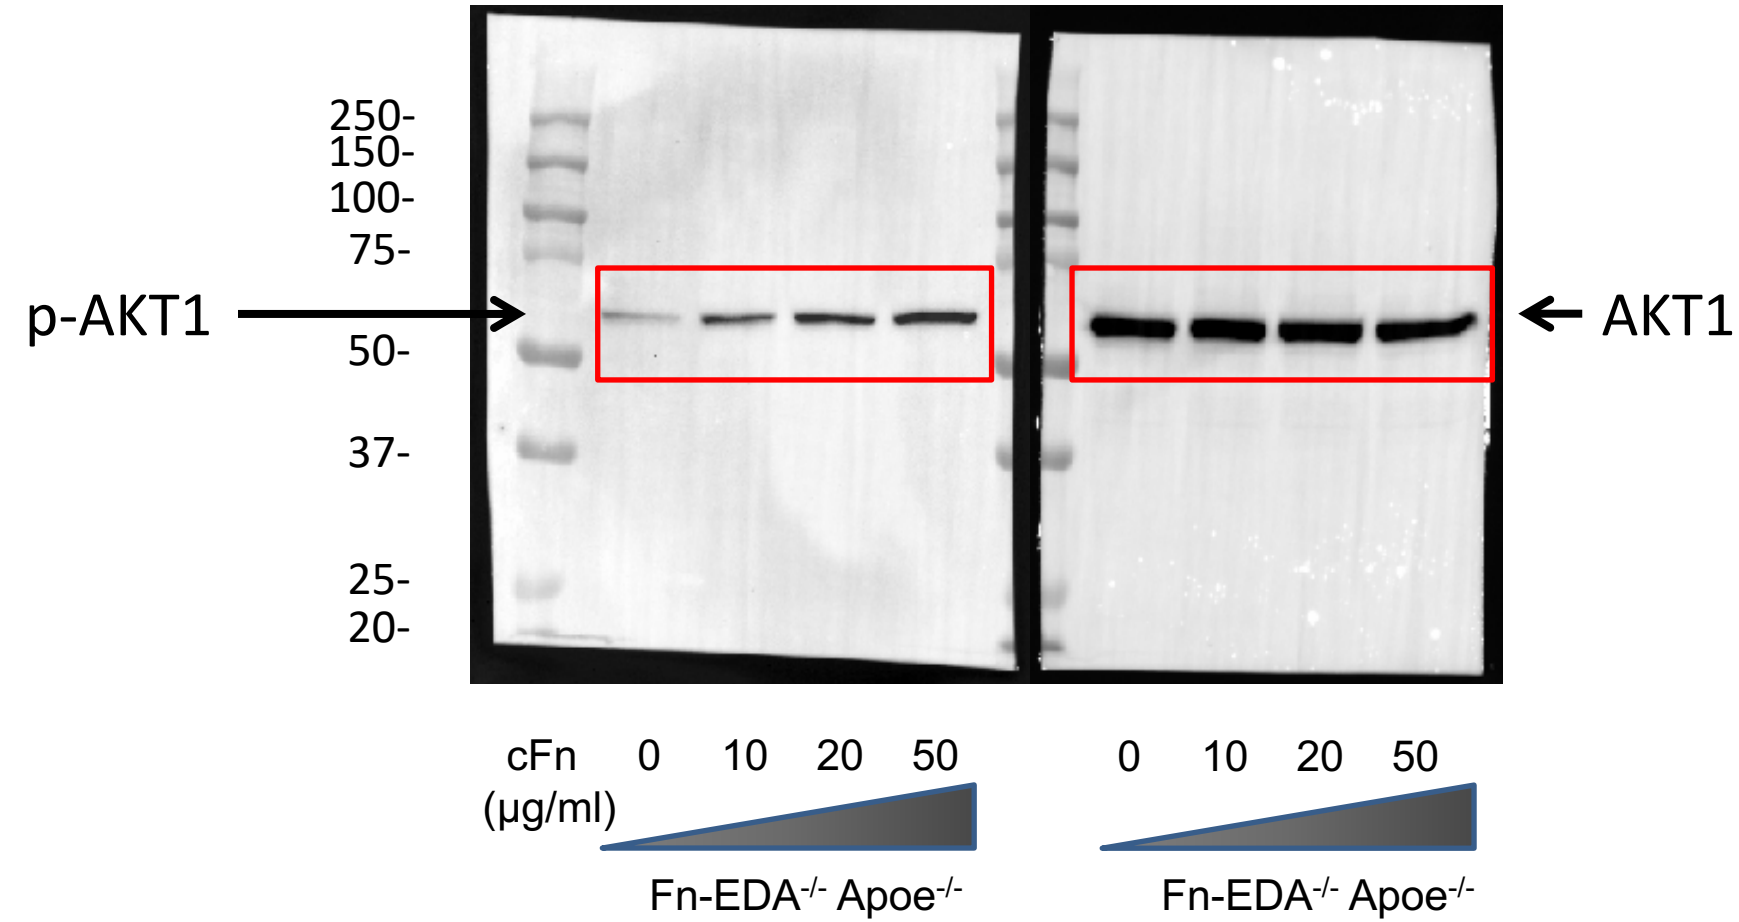

Full unedited gel for Figure 4A-p-AKT2 (left) and Total AKT2 (right)

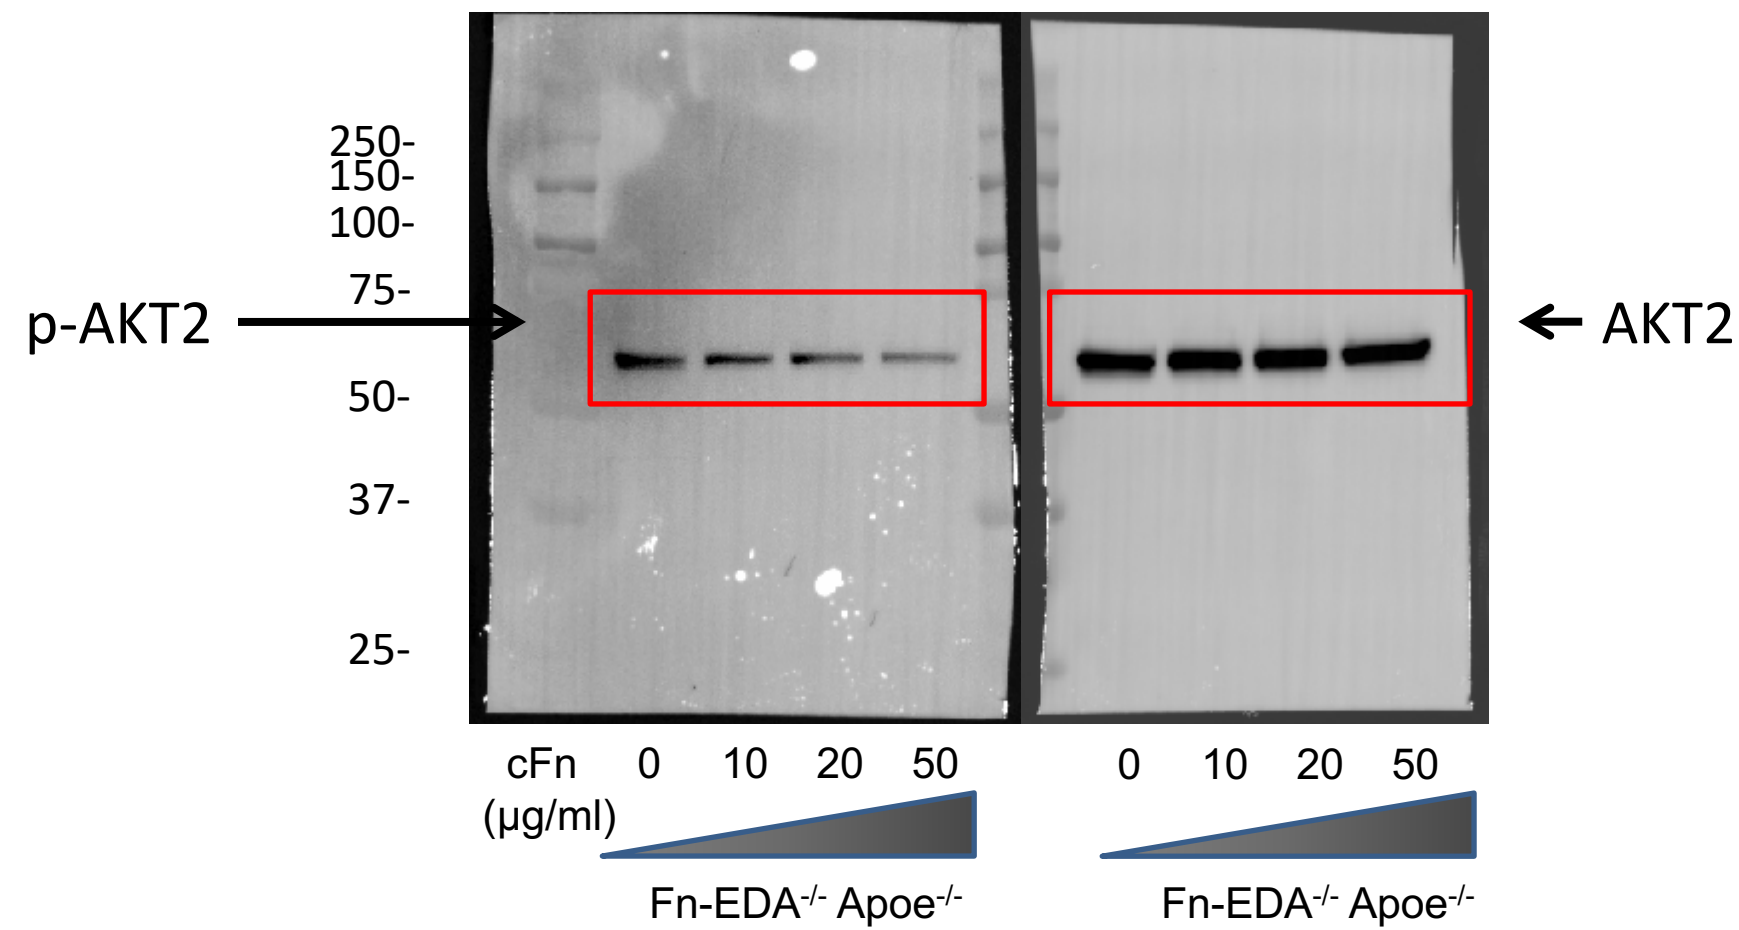

Full unedited gel for Figure 4A-p-mTOR (left) and Total mTOR (right)

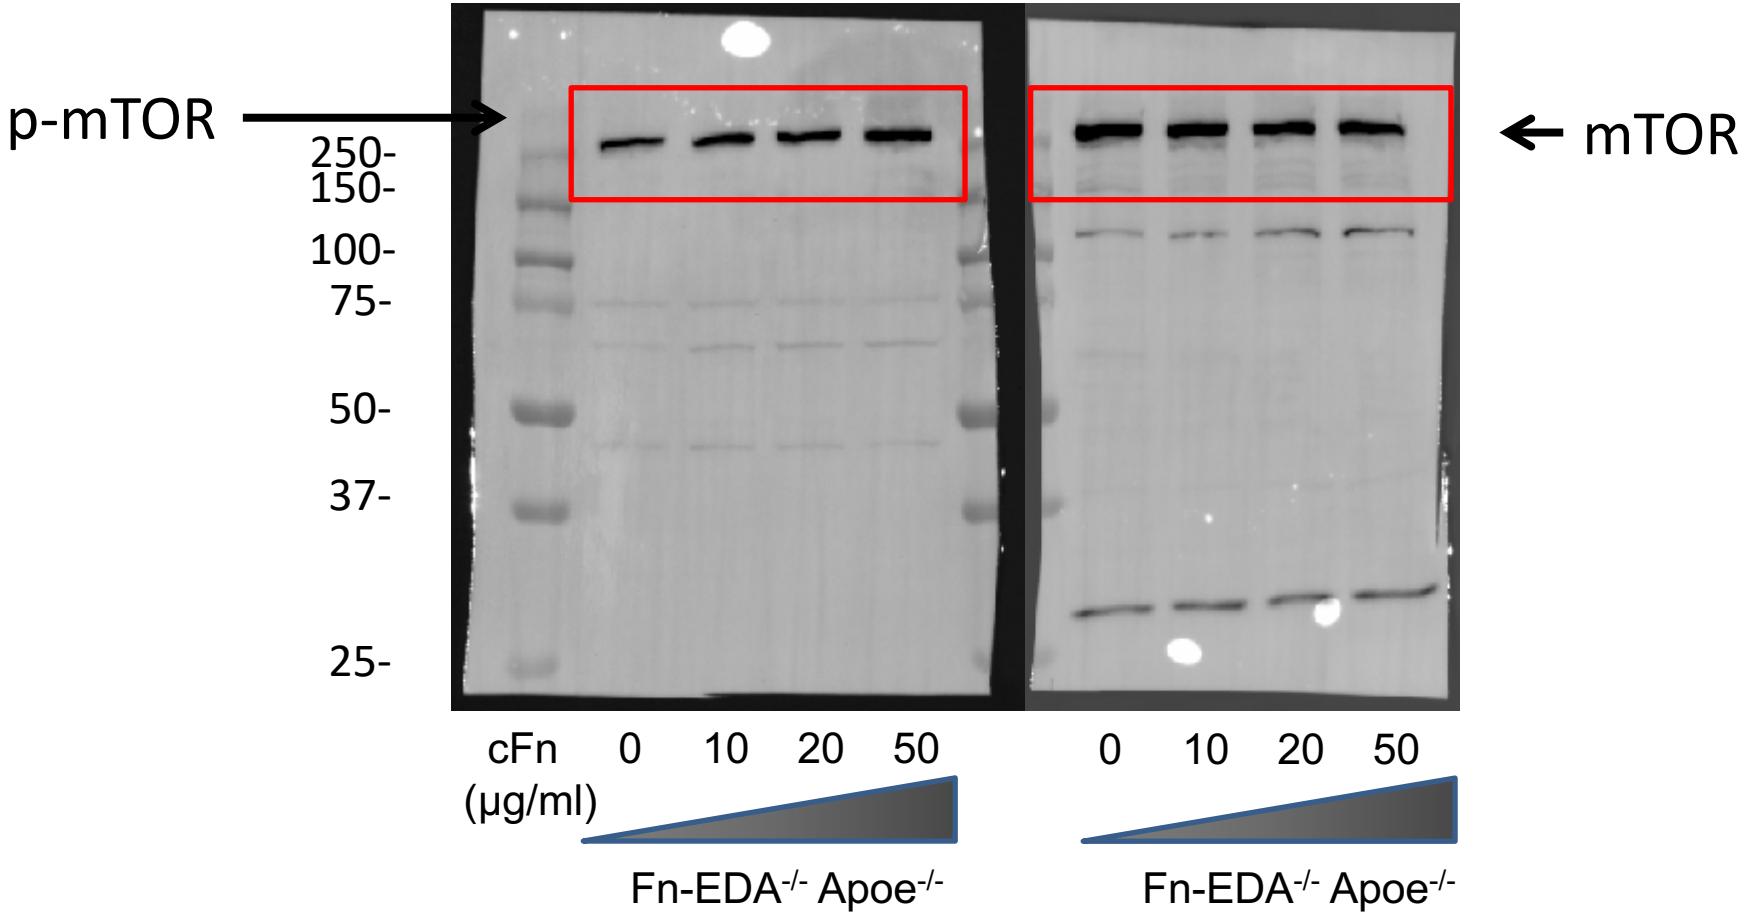



Full unedited gel for Figure 4A-p-NFκB (left) and Total NFκB (right)

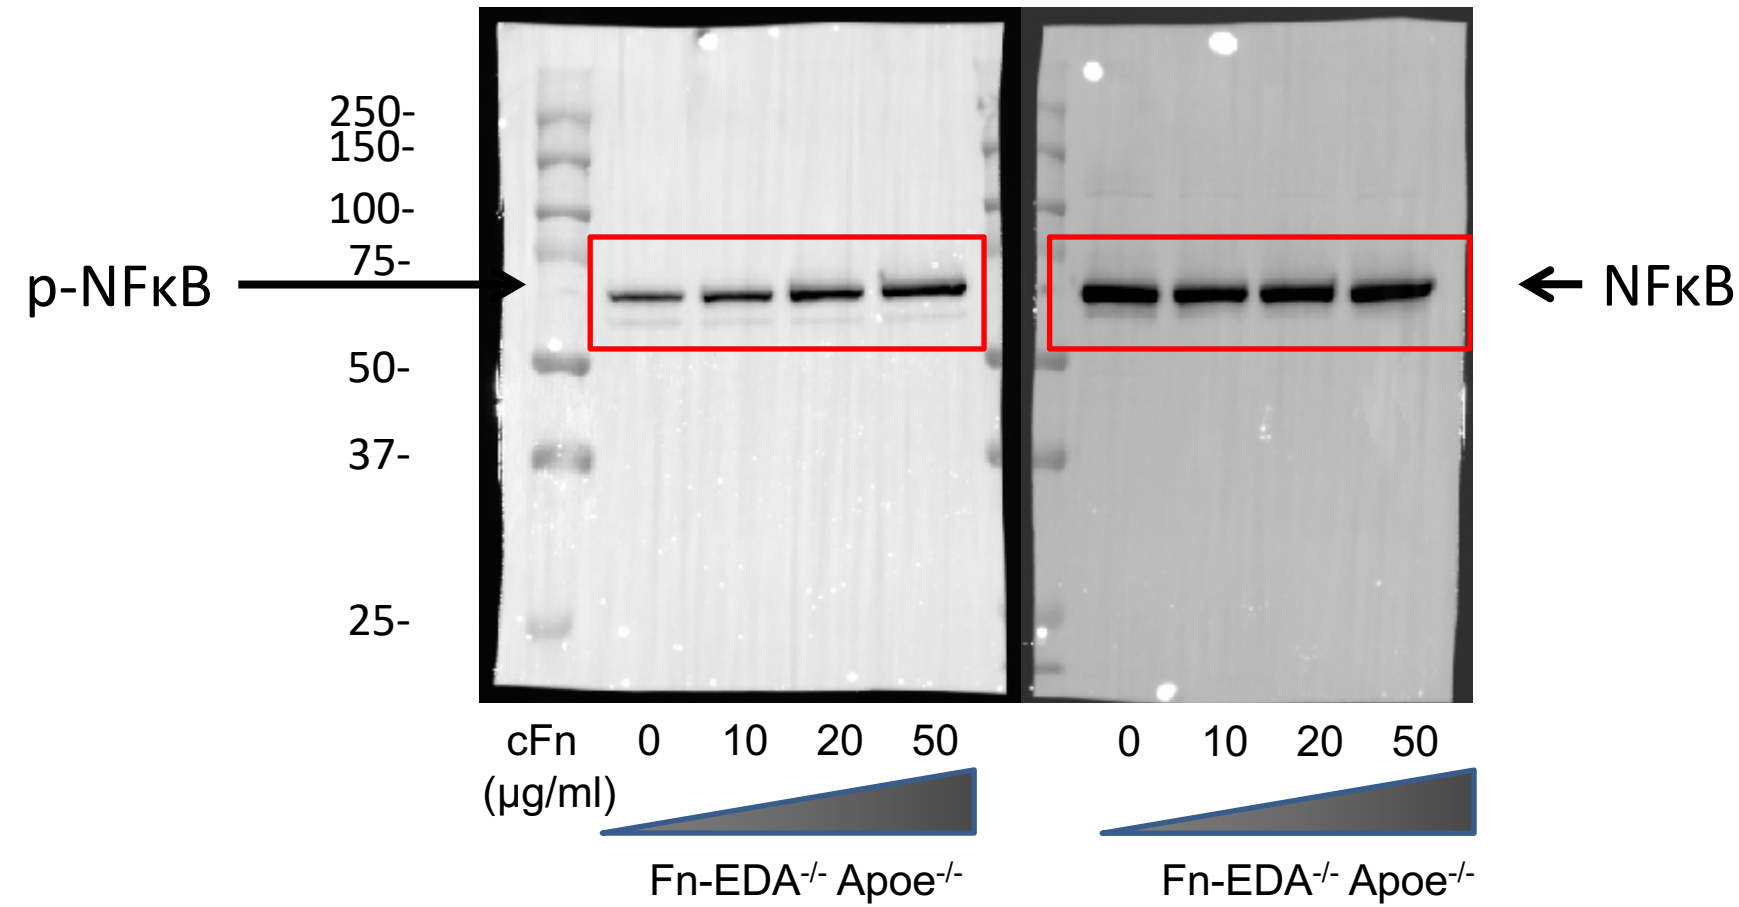

Full unedited gel for Figure 4A  $\beta$ -actin

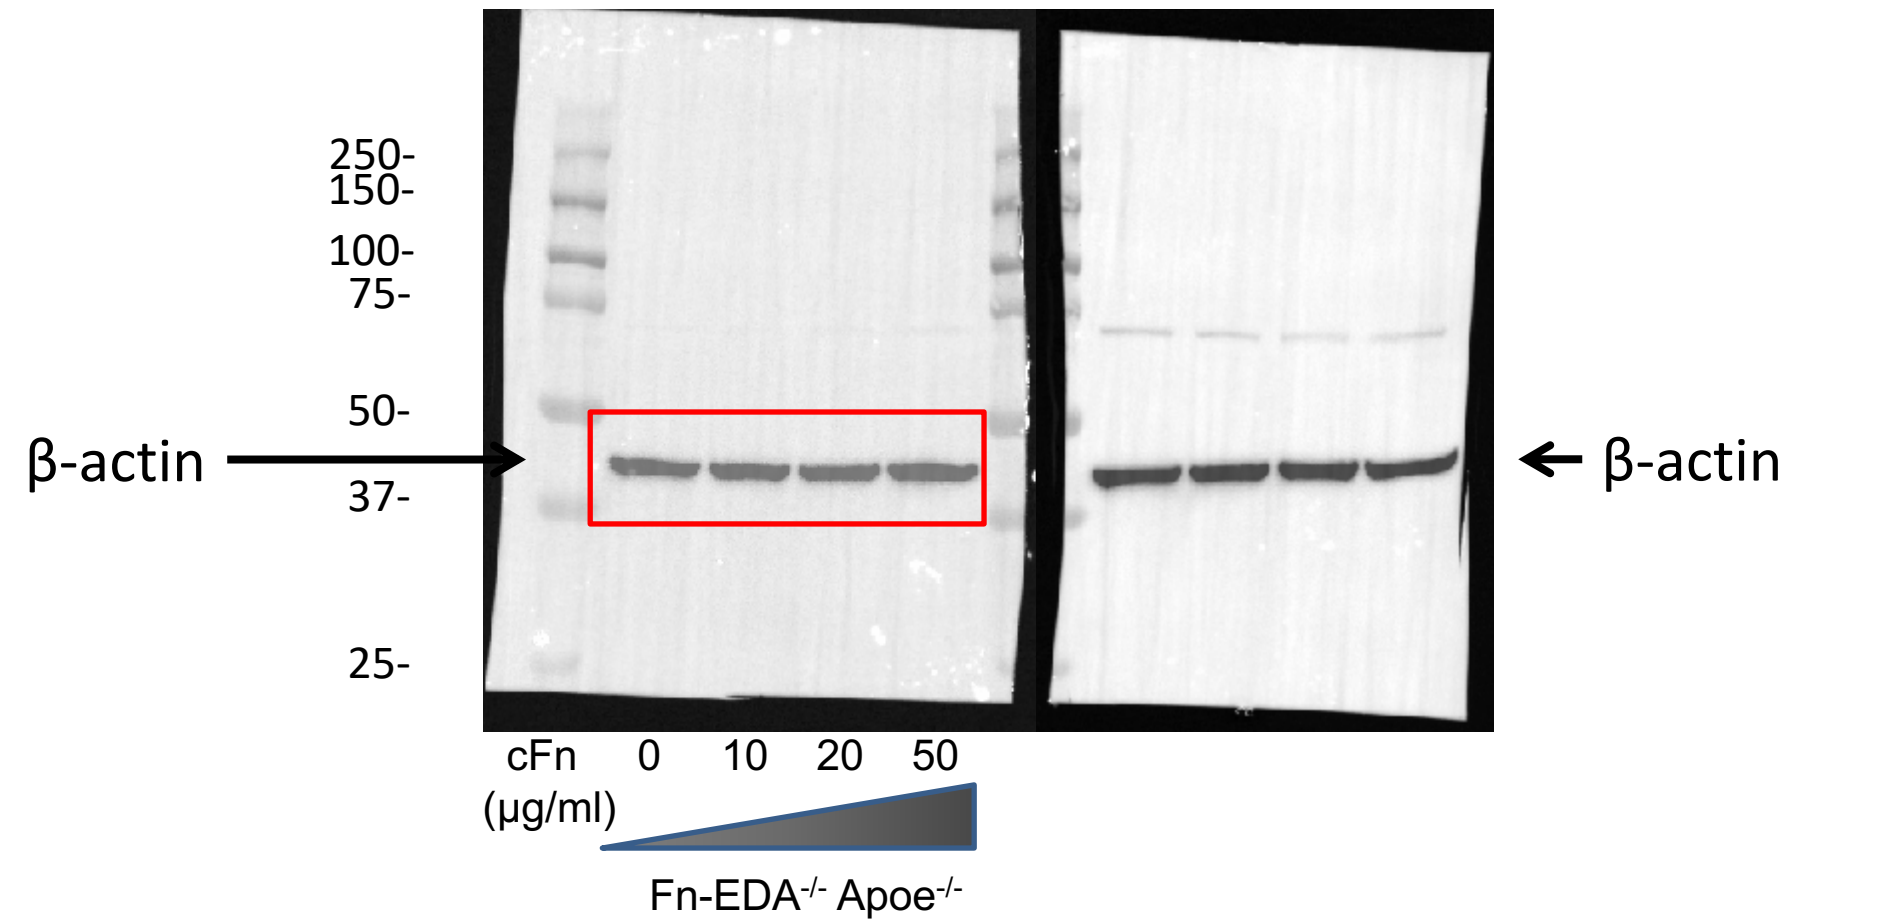

Full unedited gel for Figure 4D-SM22α

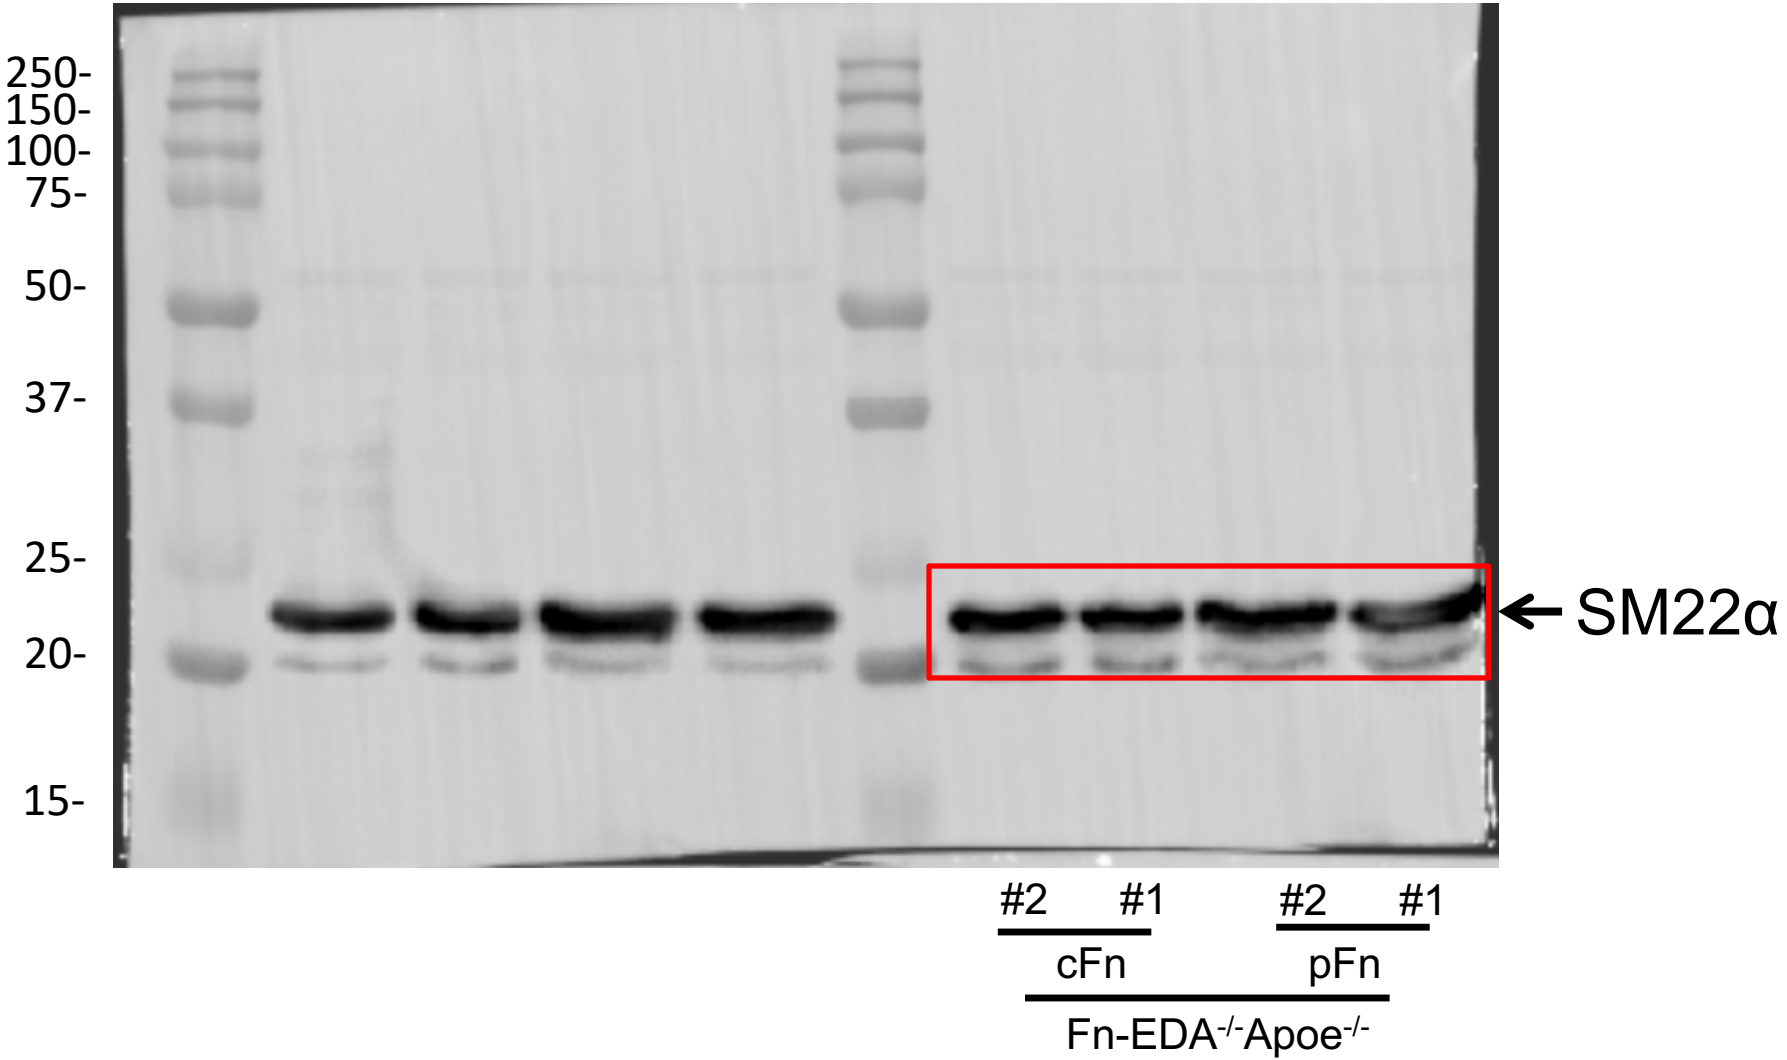

Full unedited gel for Figure 4D-Osteopontin

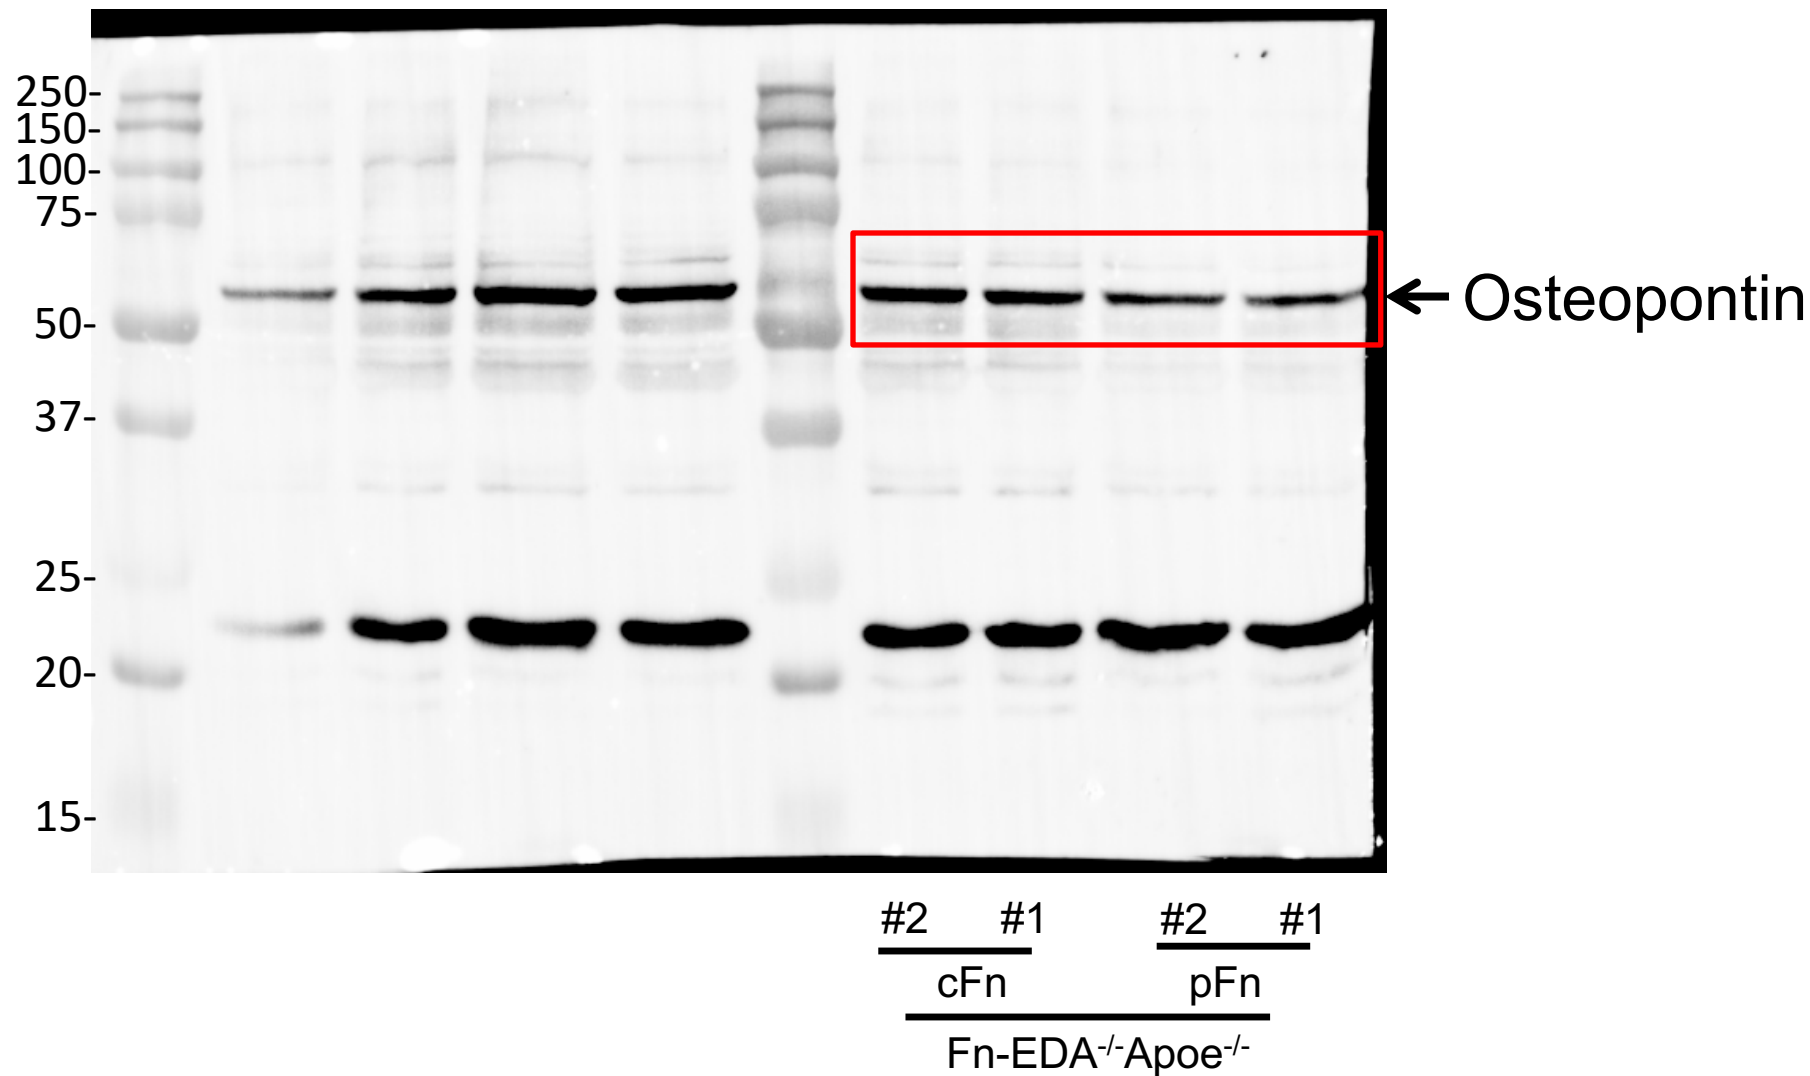

Full unedited gel for Figure 4D-β-actin

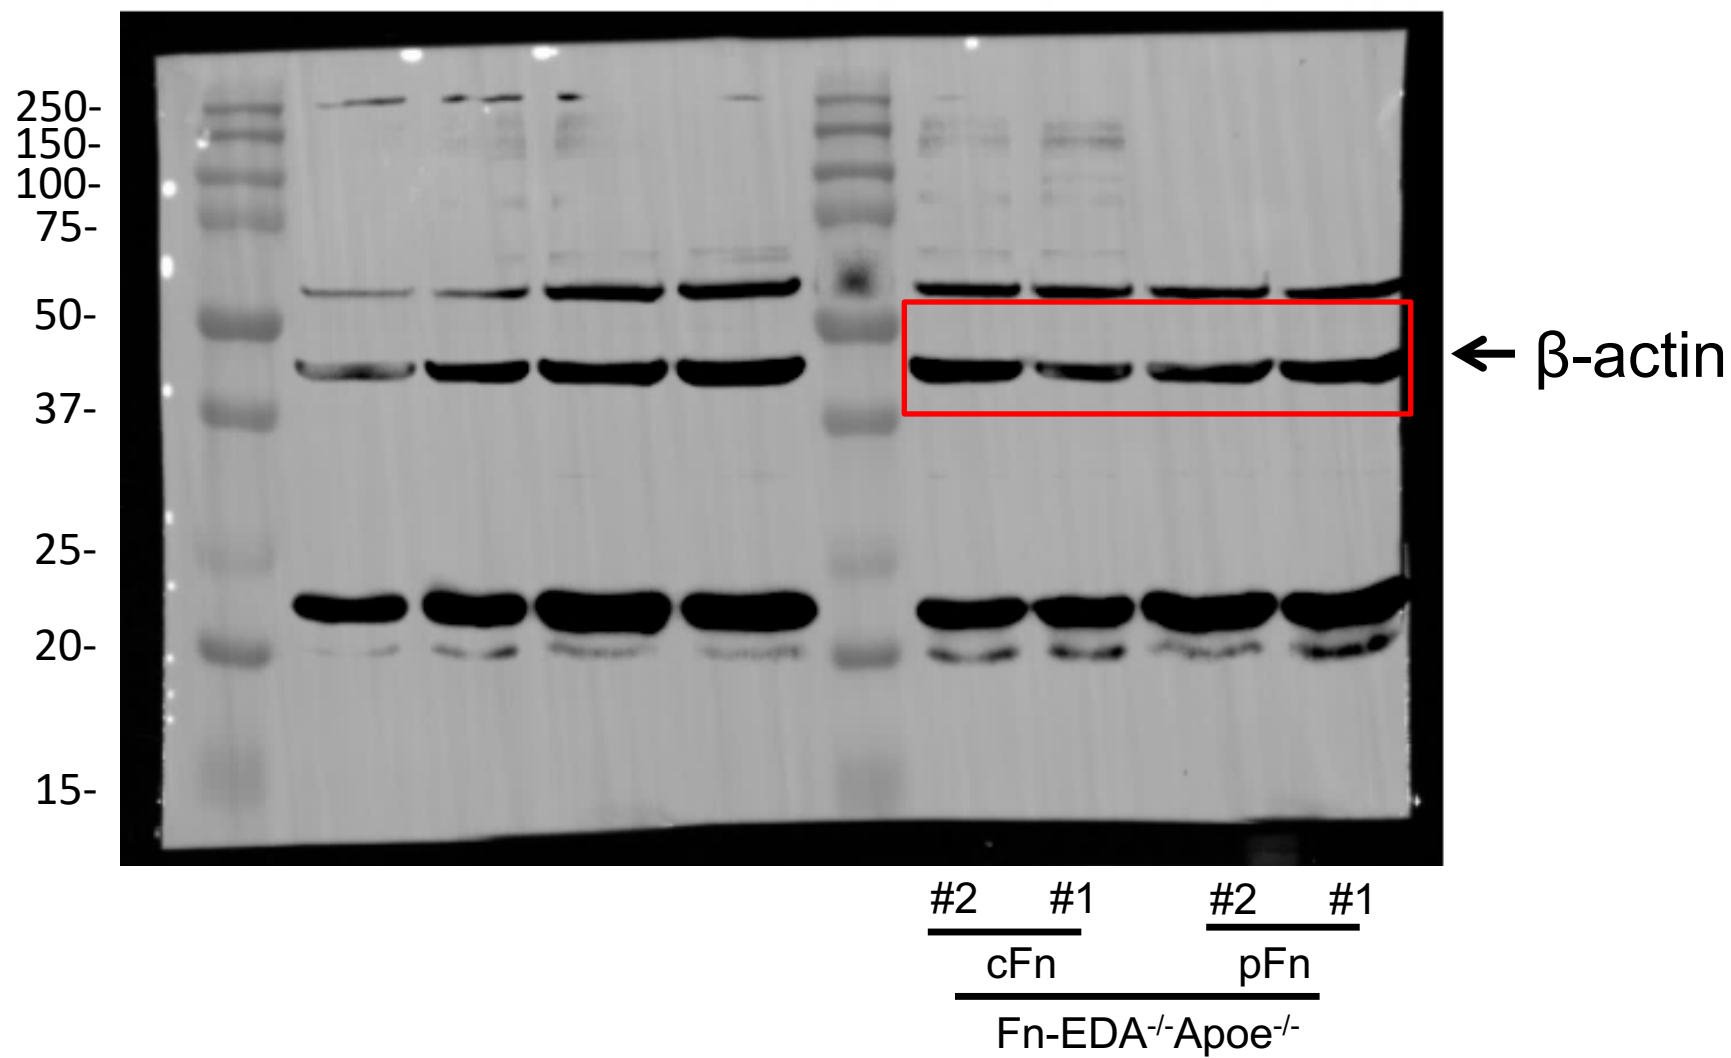

Full unedited gel for Figure 4D-SM-MHC

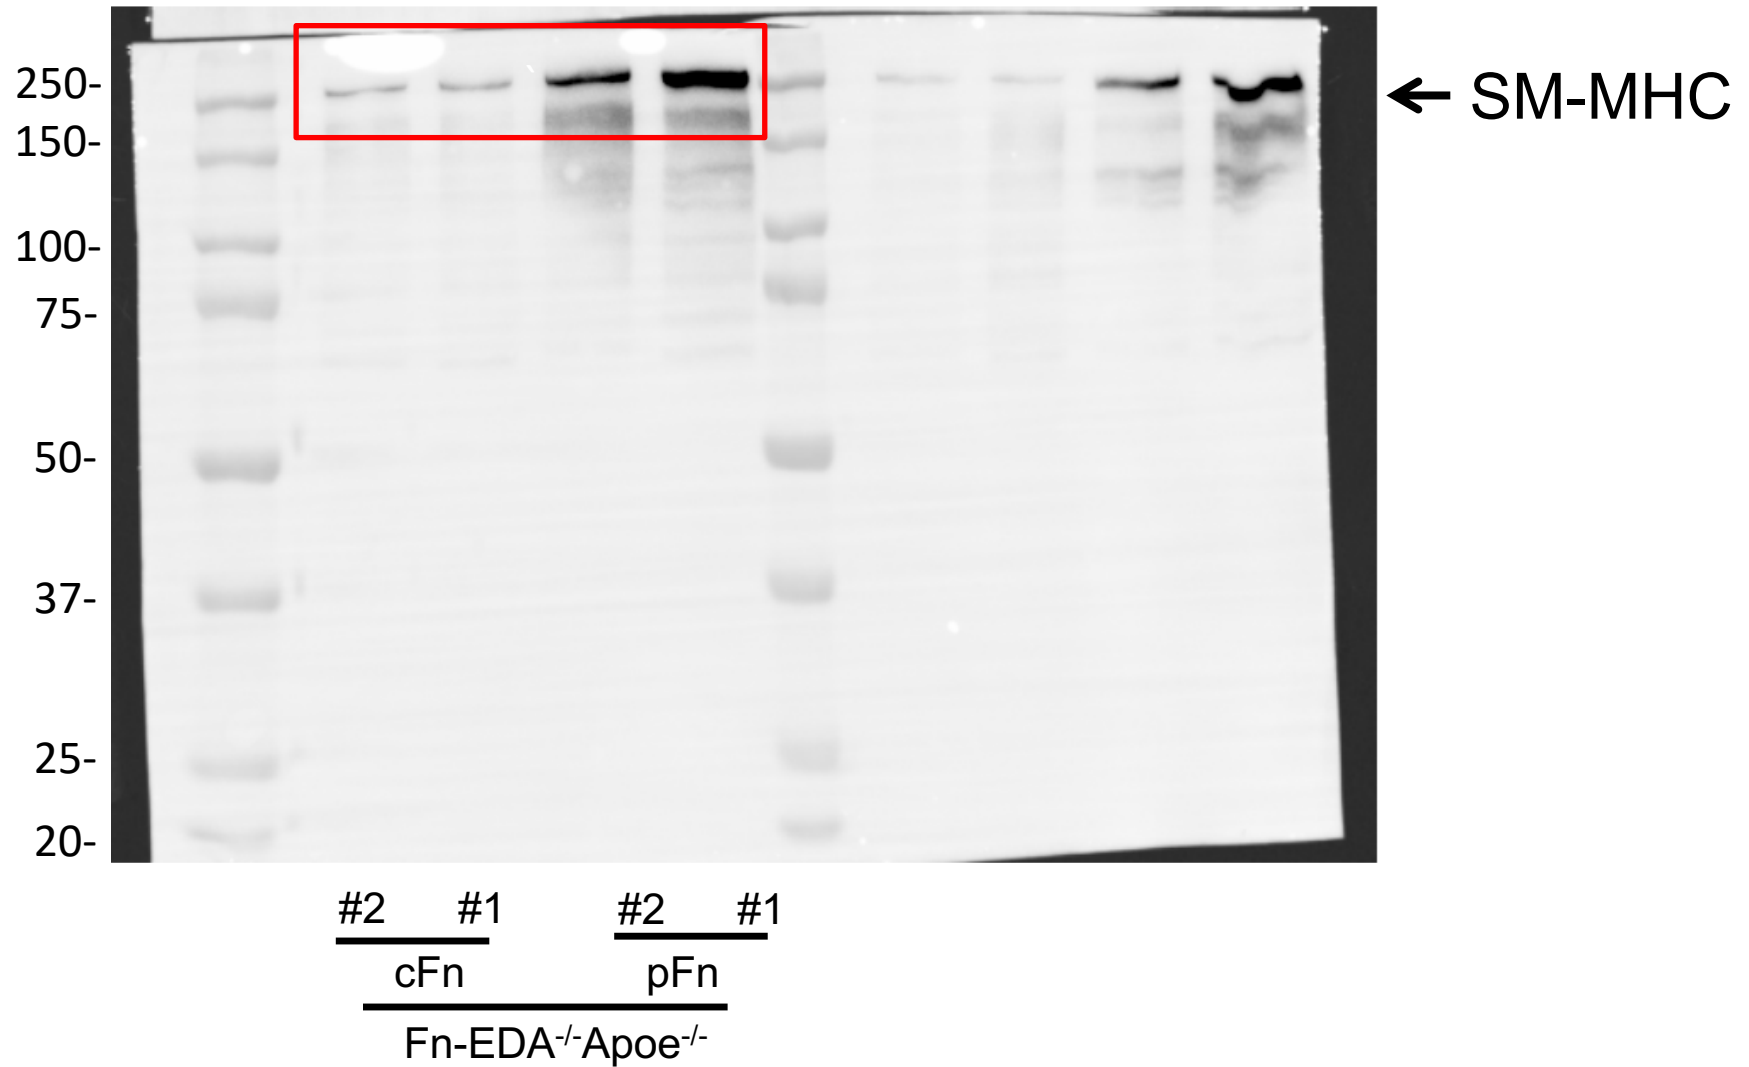

Full unedited gel for Figure 4D-Vimentin

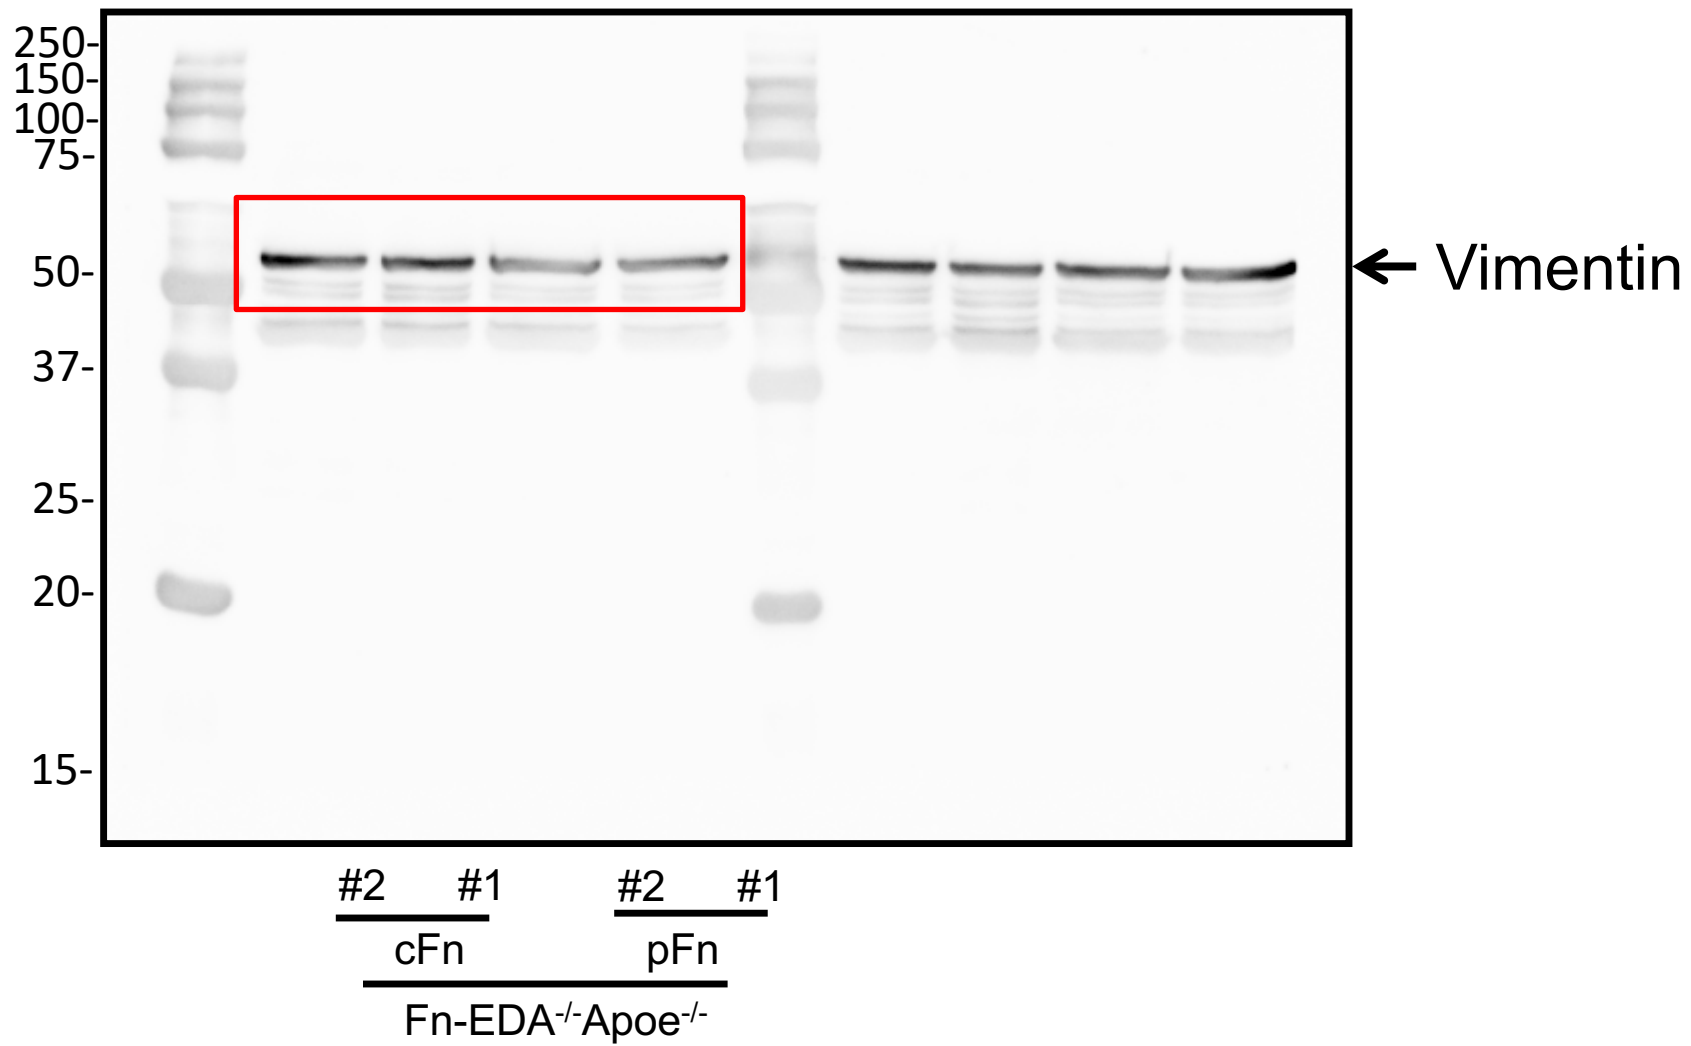



Full unedited gel for Figure 4D-β-actin

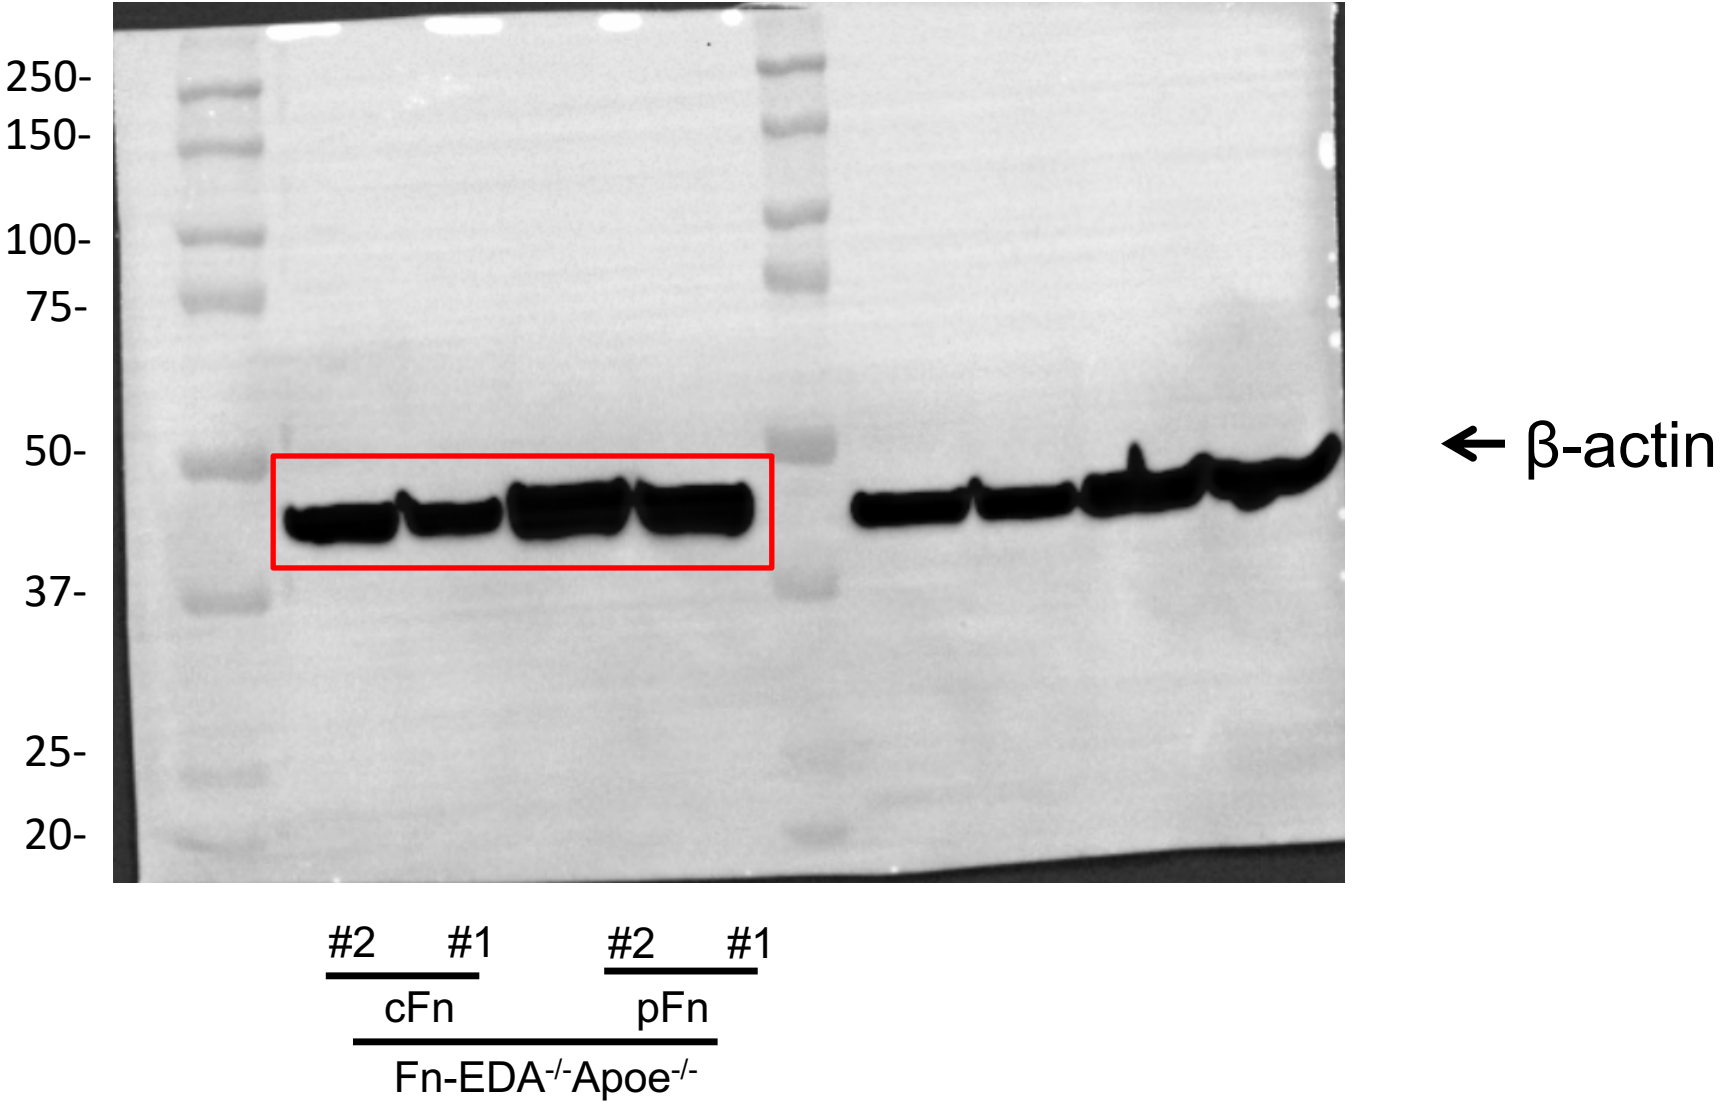

Full unedited gel for Figure 5A-SM22α

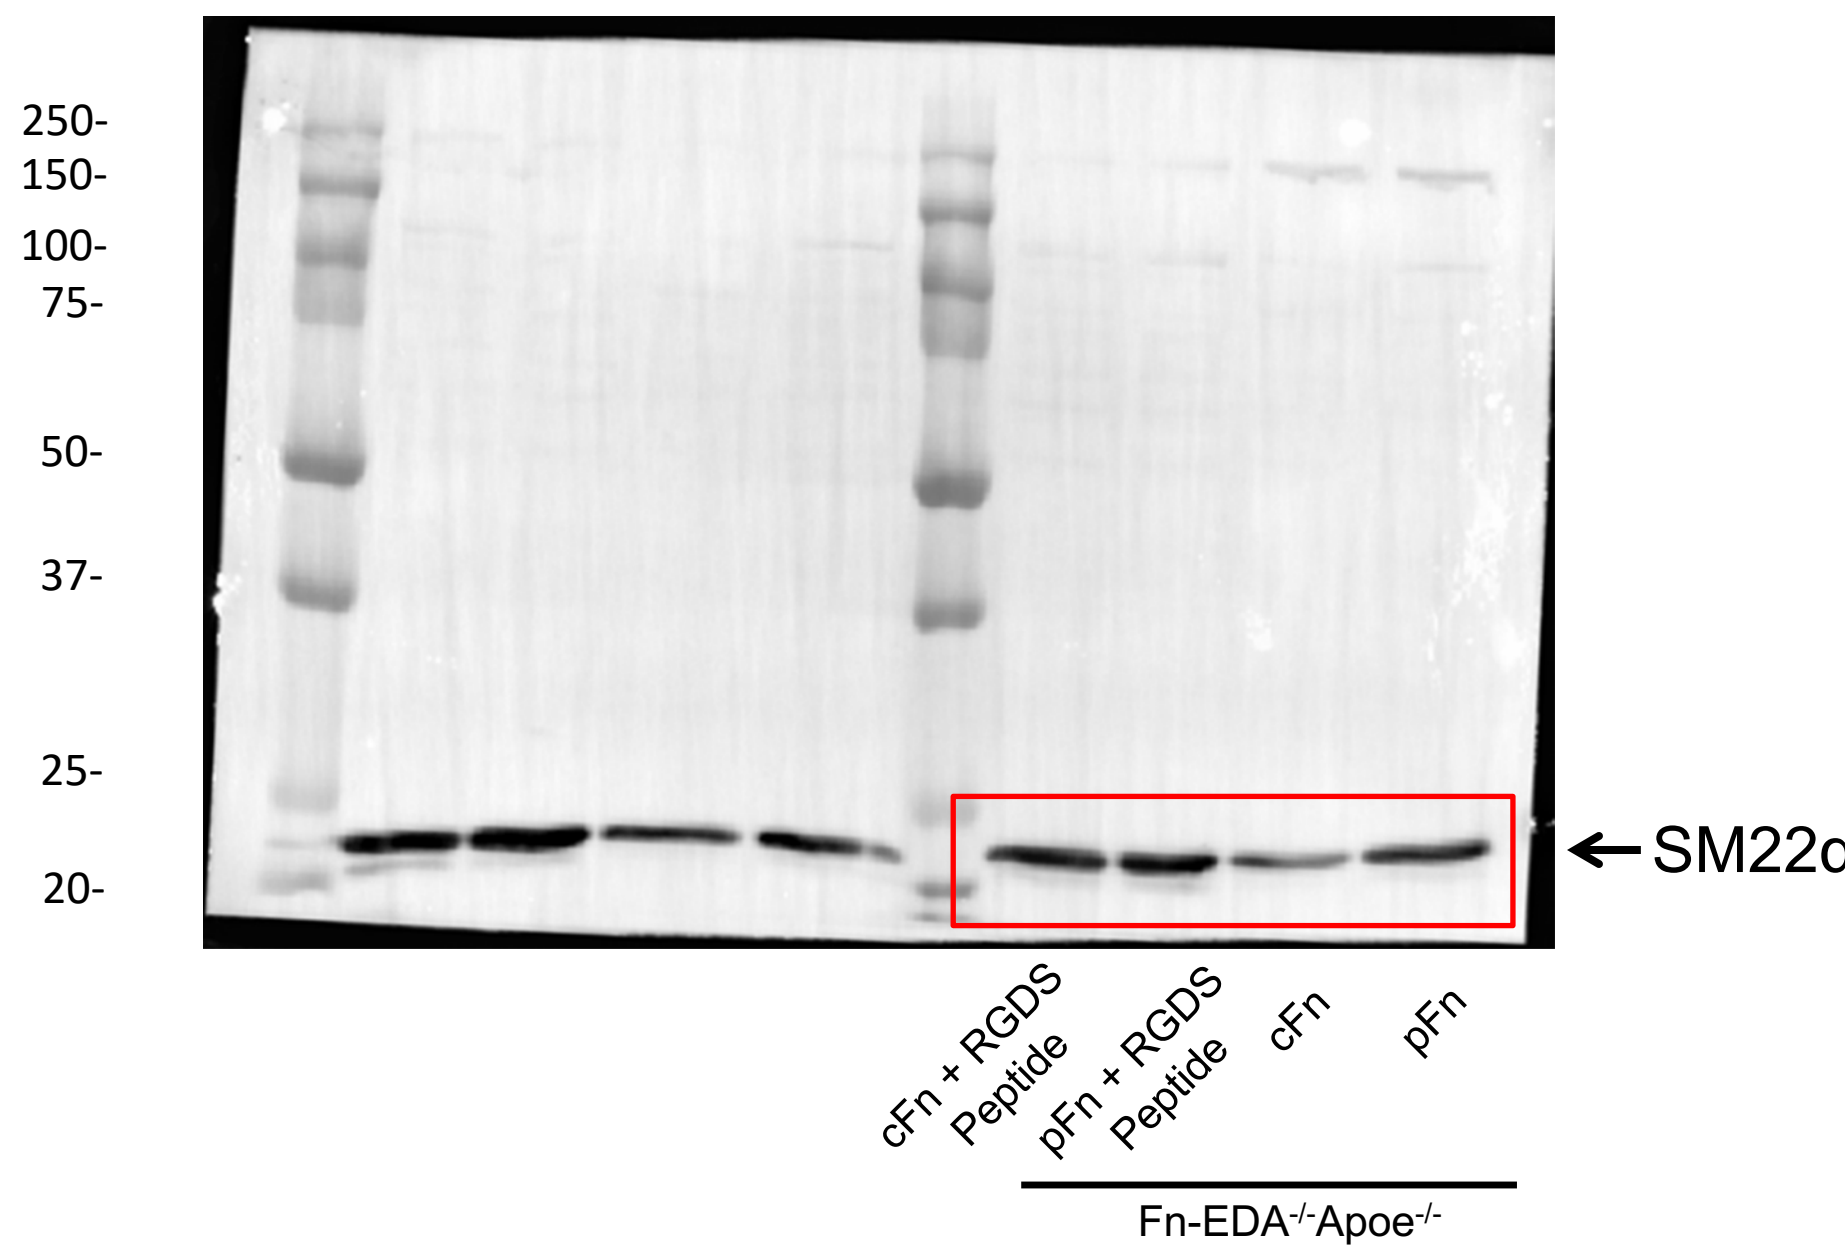

Full unedited gel for Figure 5A-SM-MHC

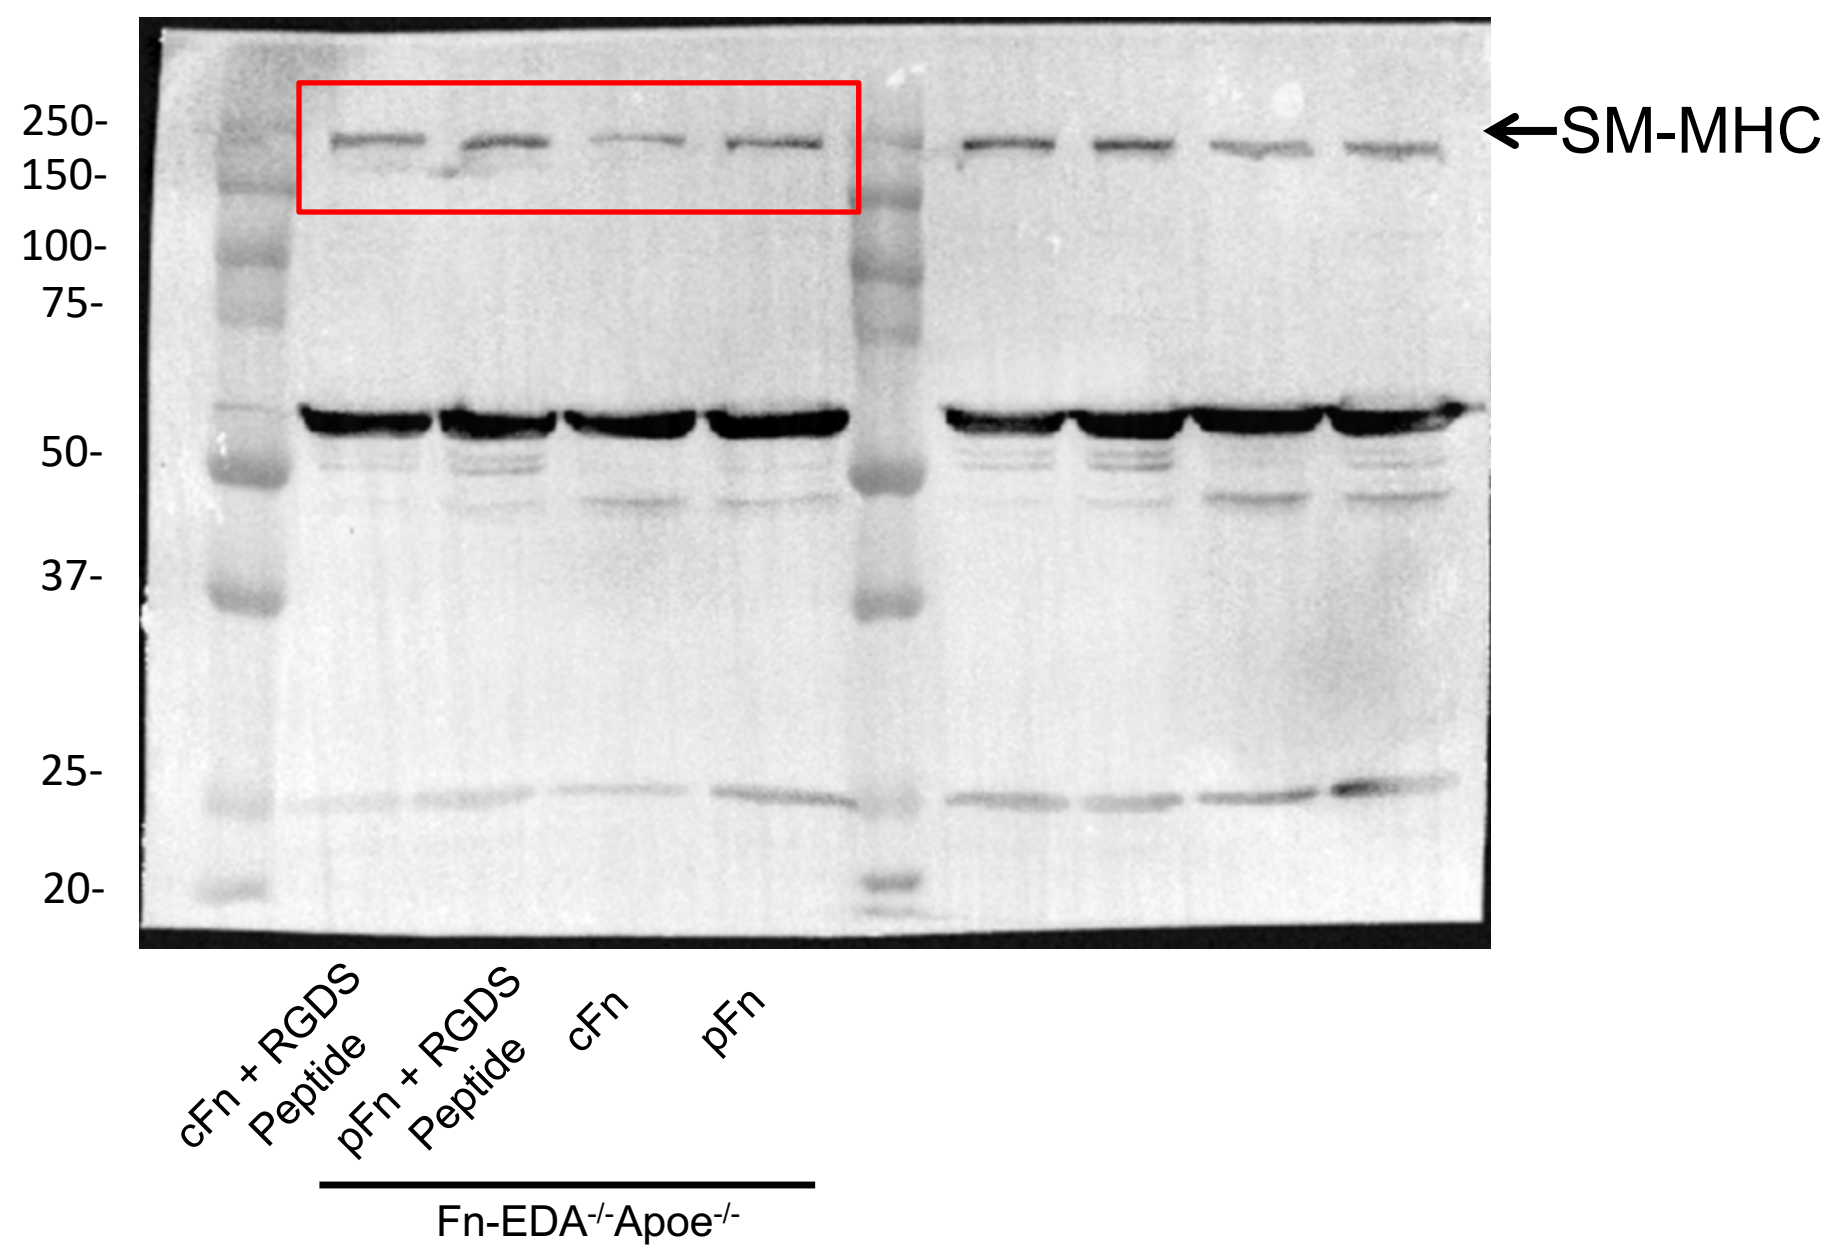

Full unedited gel for Figure 5A- Vimentin

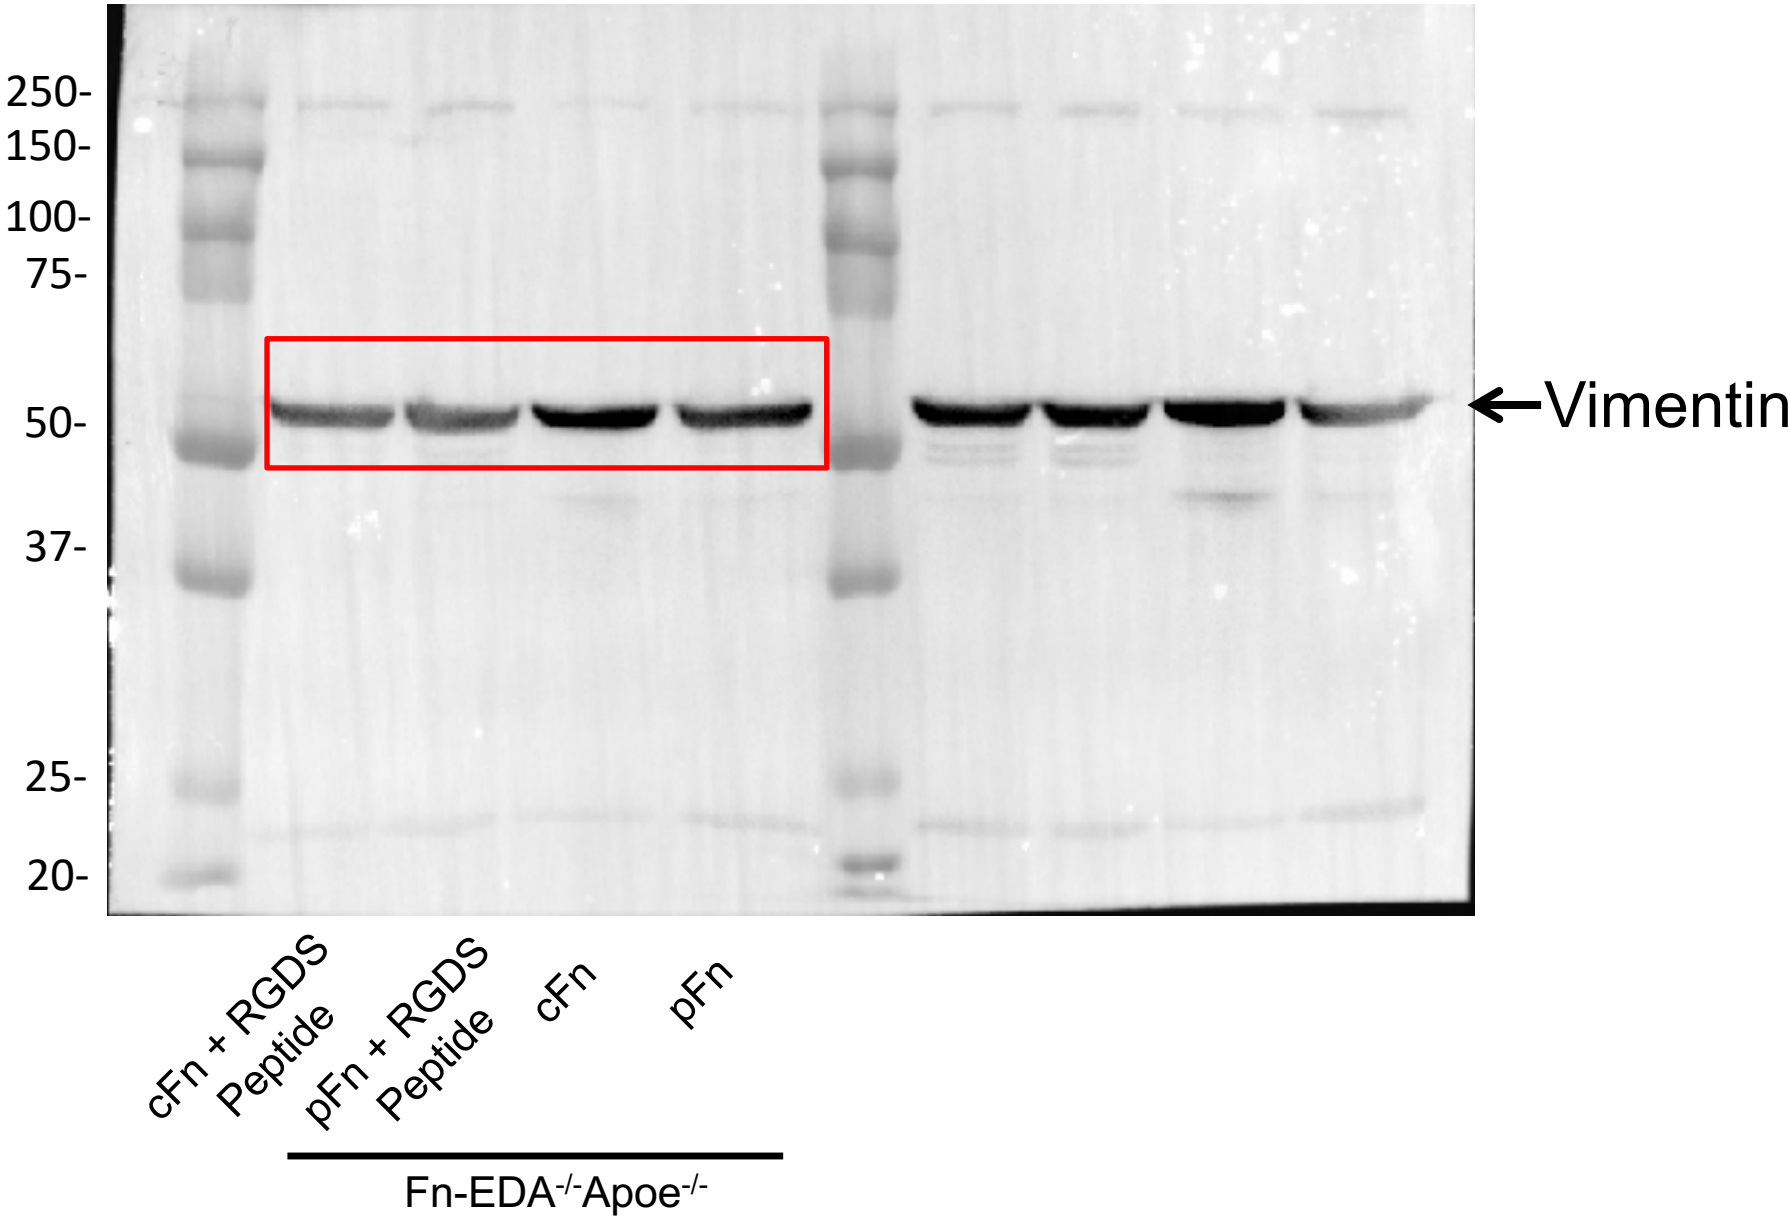

Full unedited gel for Figure 5A-Osteopontin

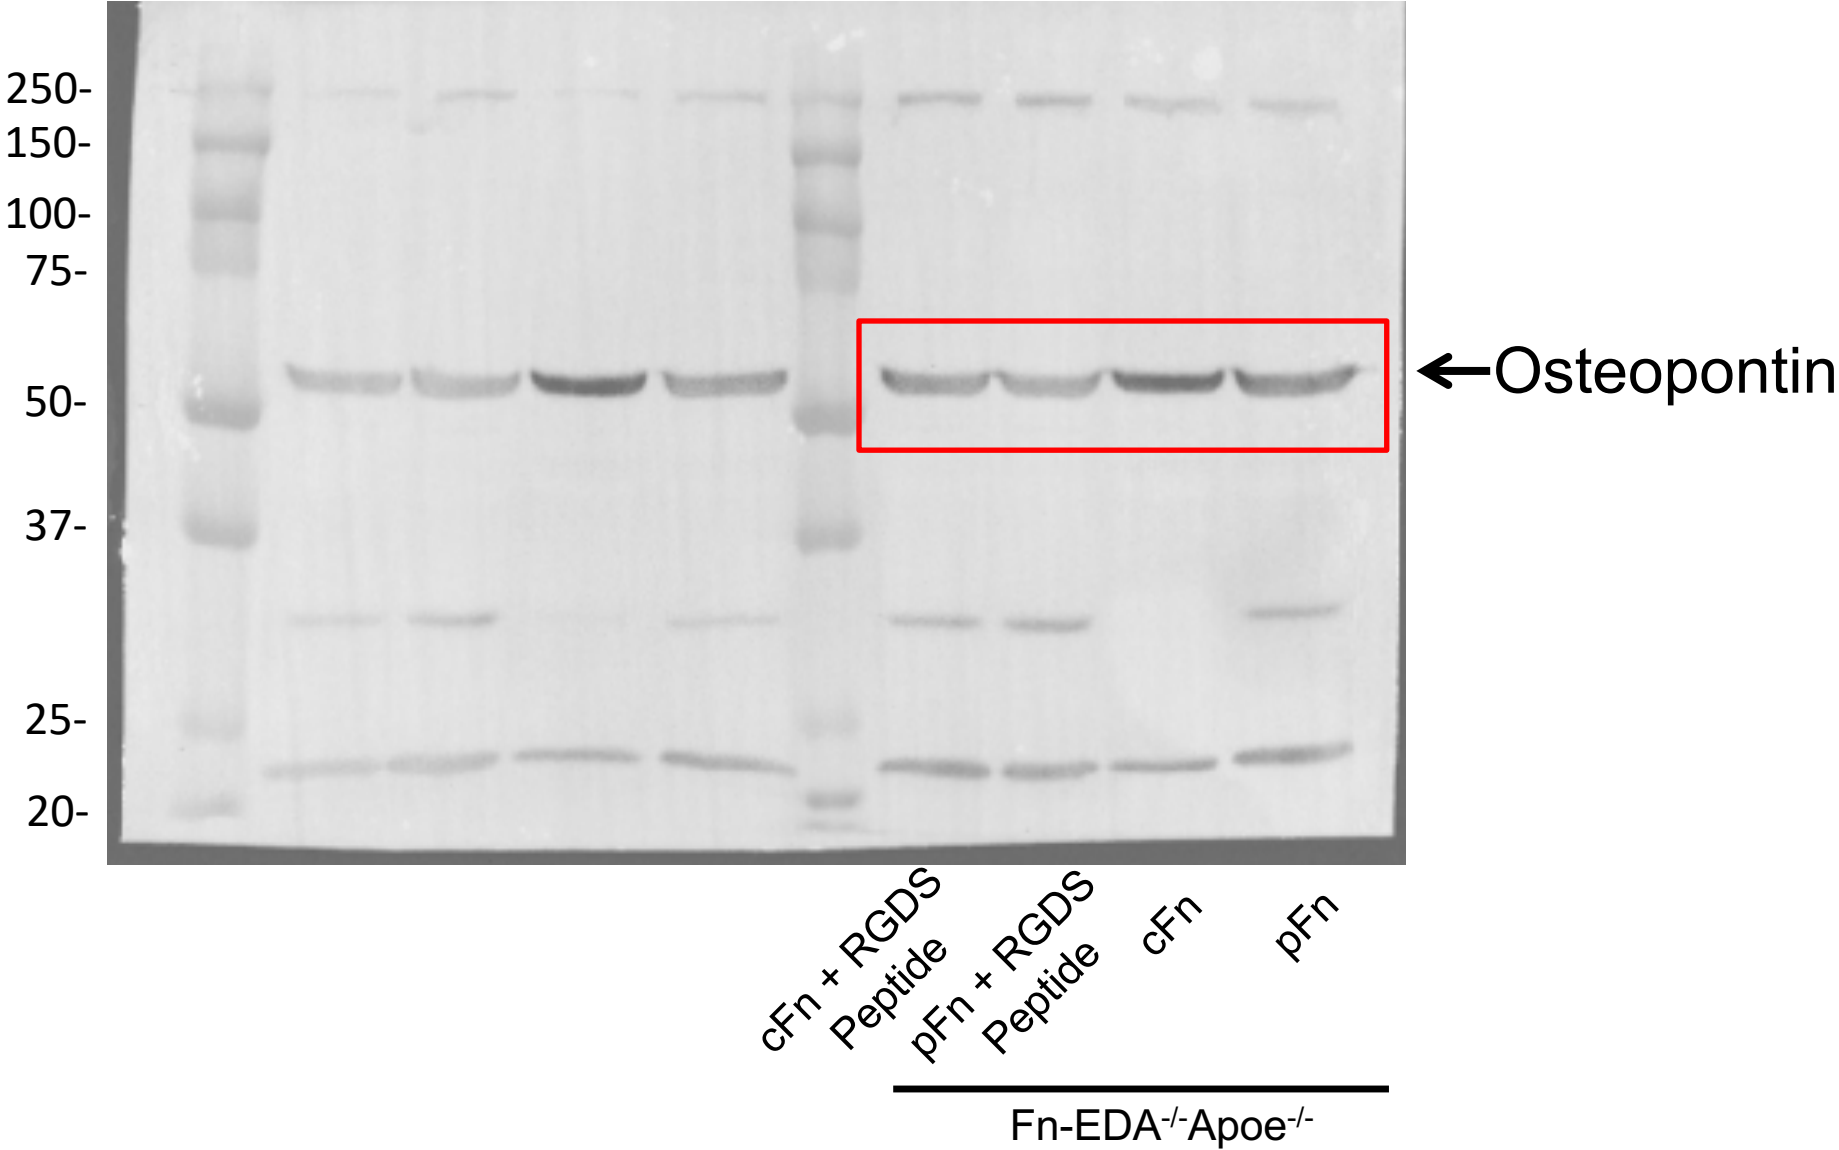

Full unedited gel for Figure 5A-β-actin

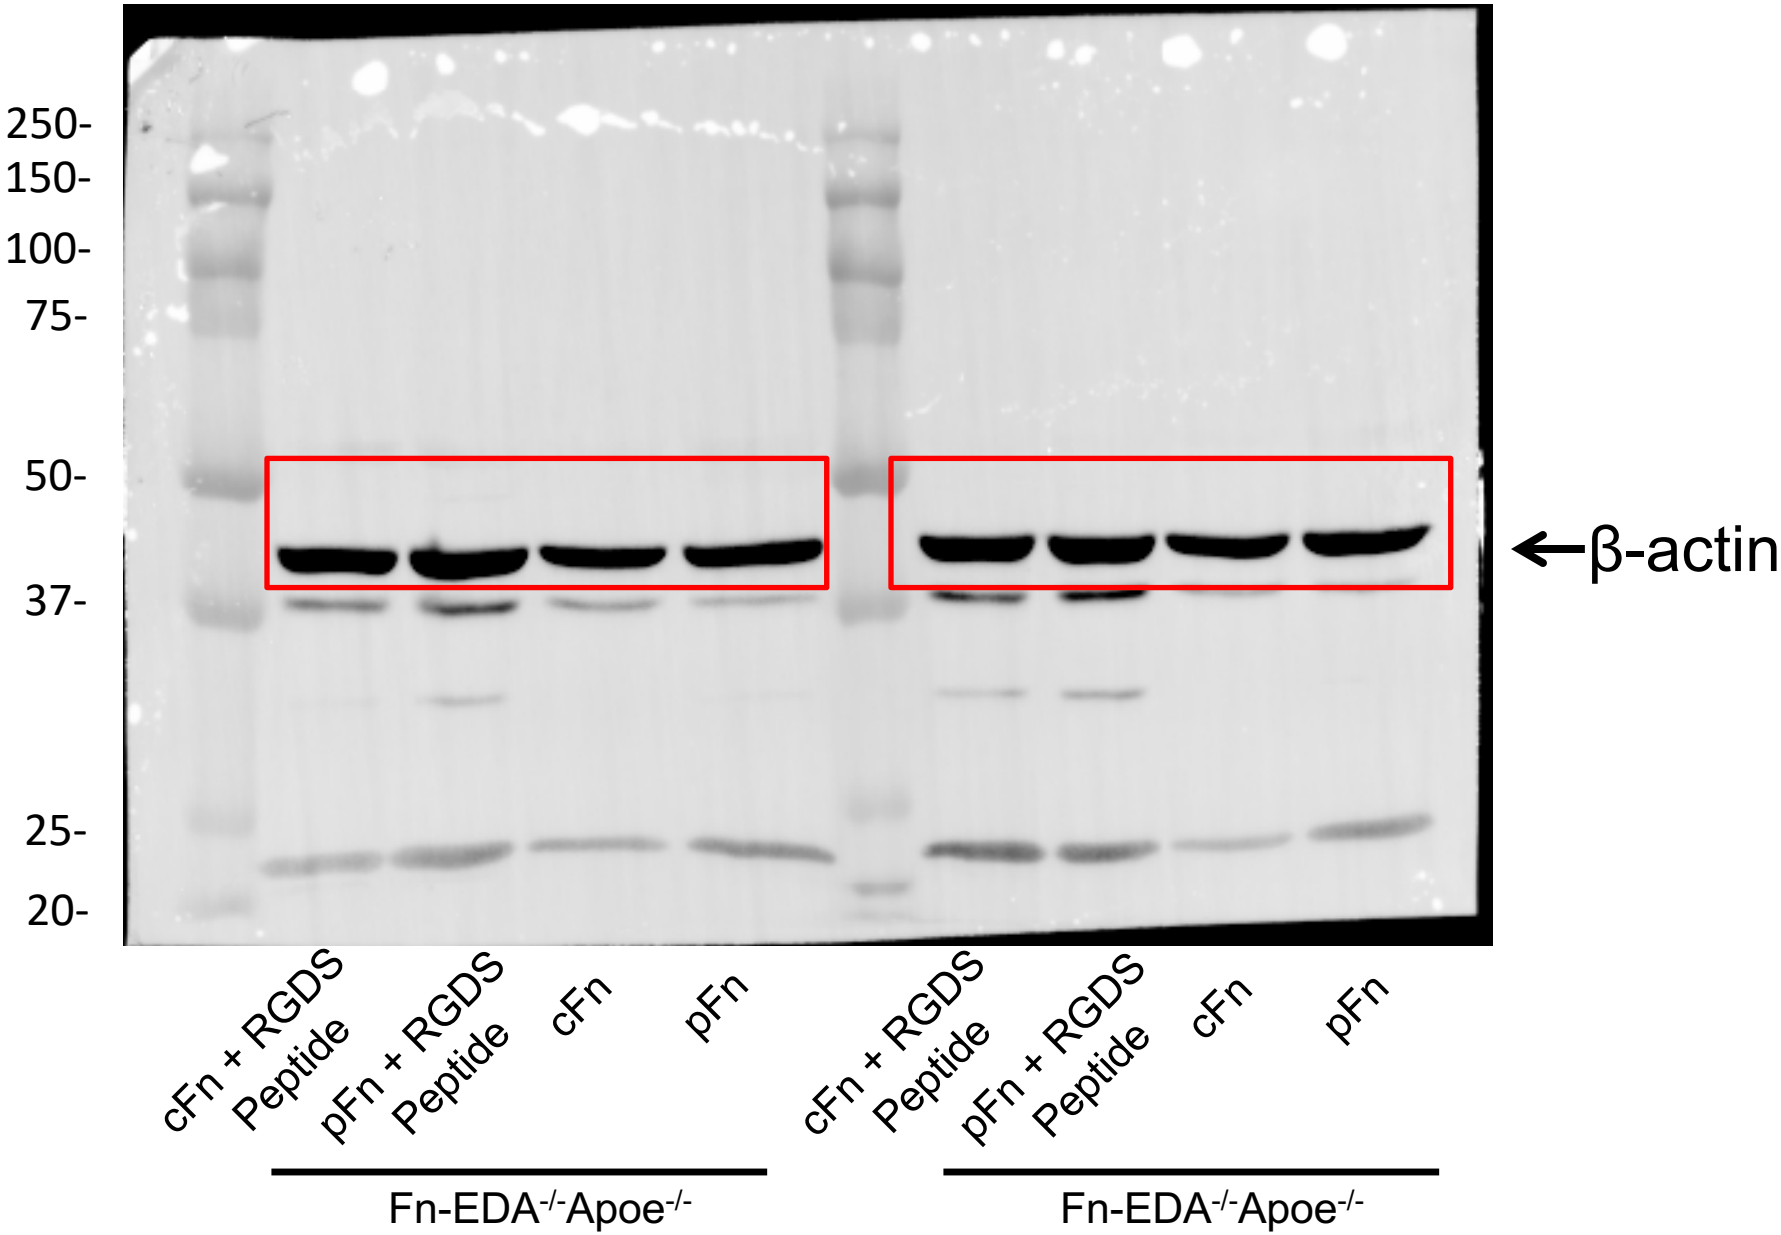

Full unedited gel for Figure 6A-Fn-EDA

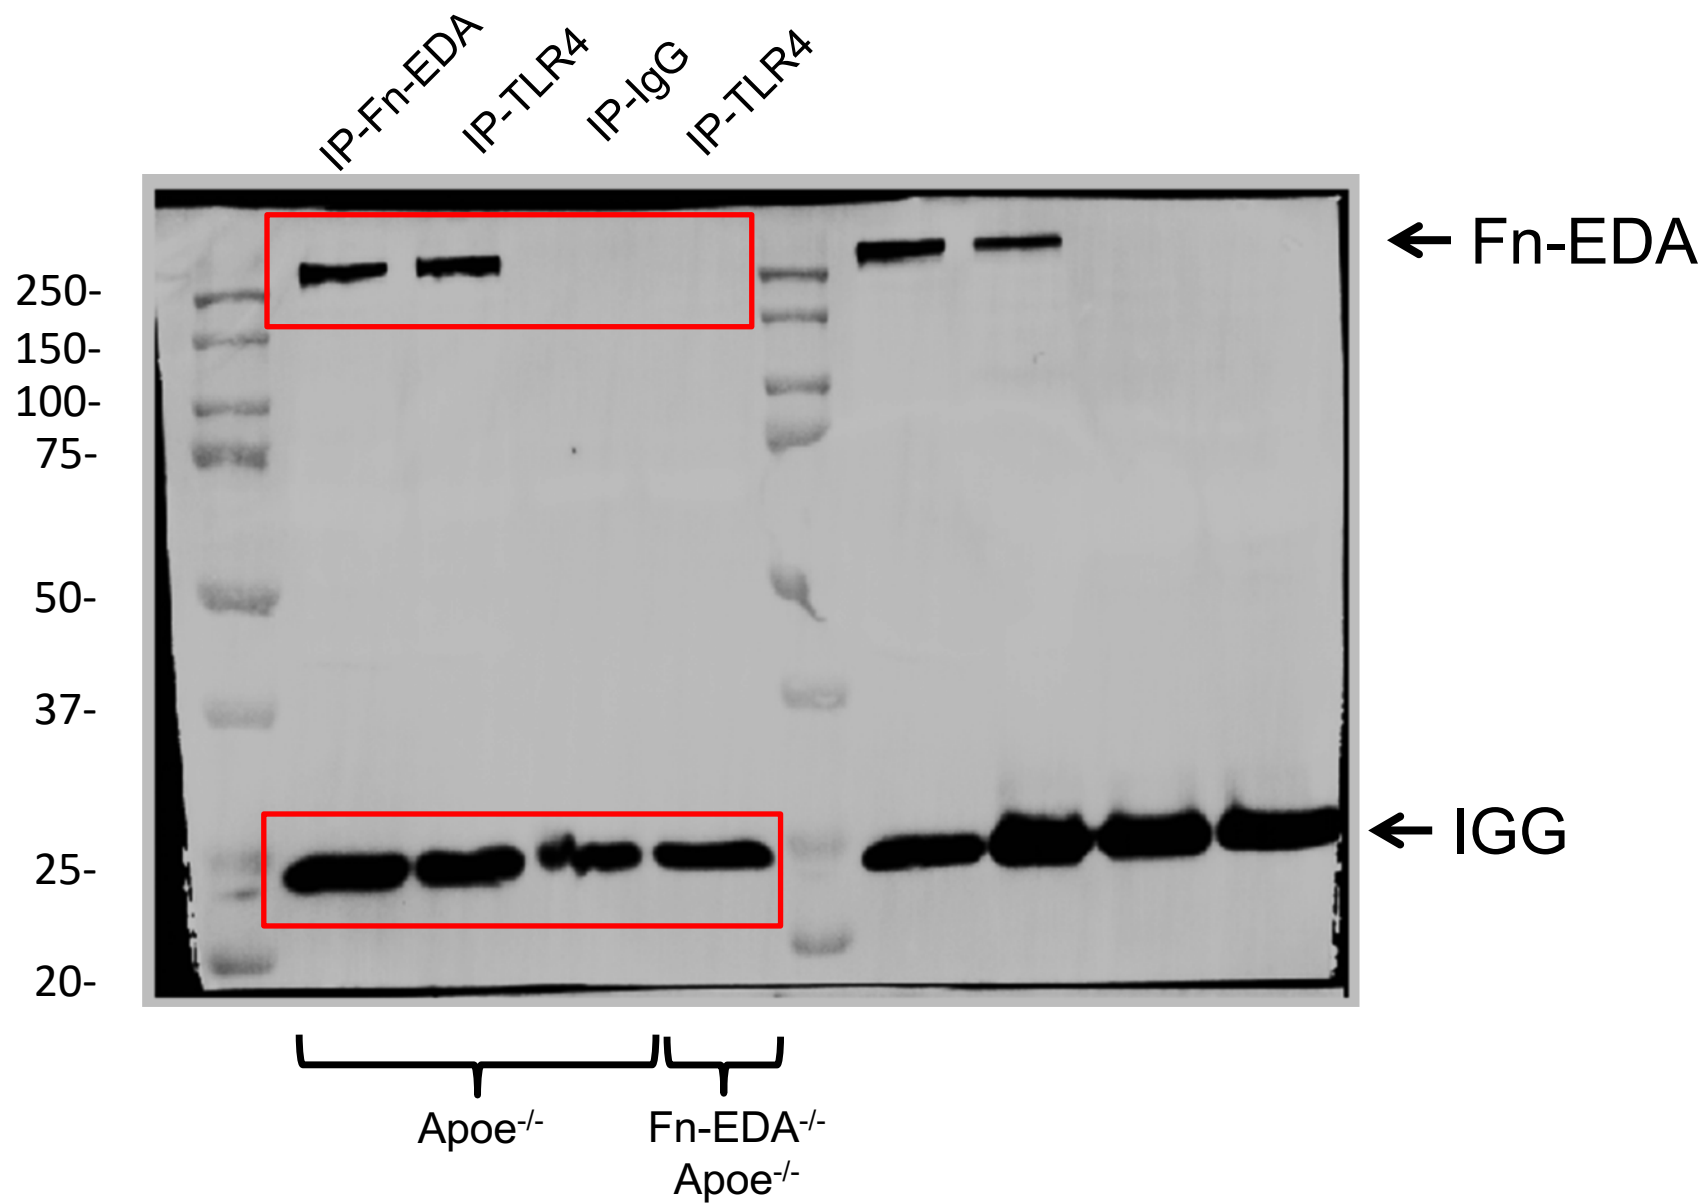

Full unedited gel for Figure 7A-p-AKT1

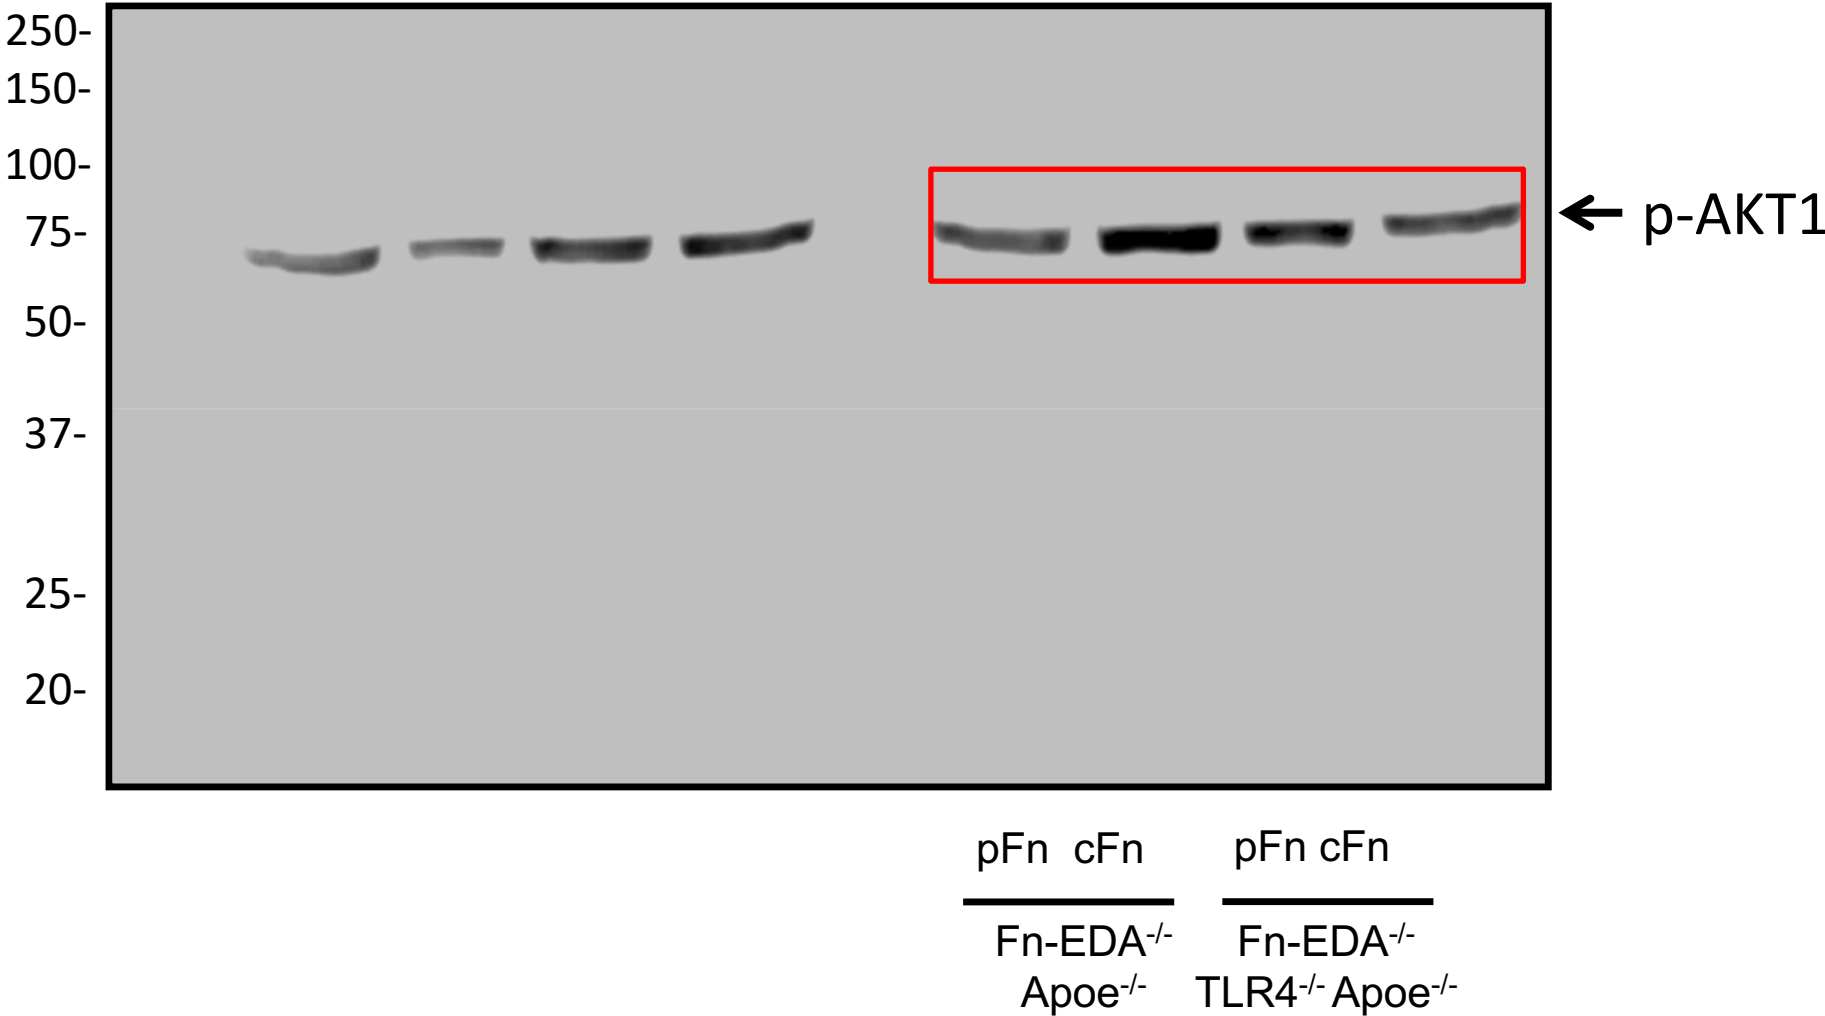



Full unedited gel for Figure 7A-AKT1

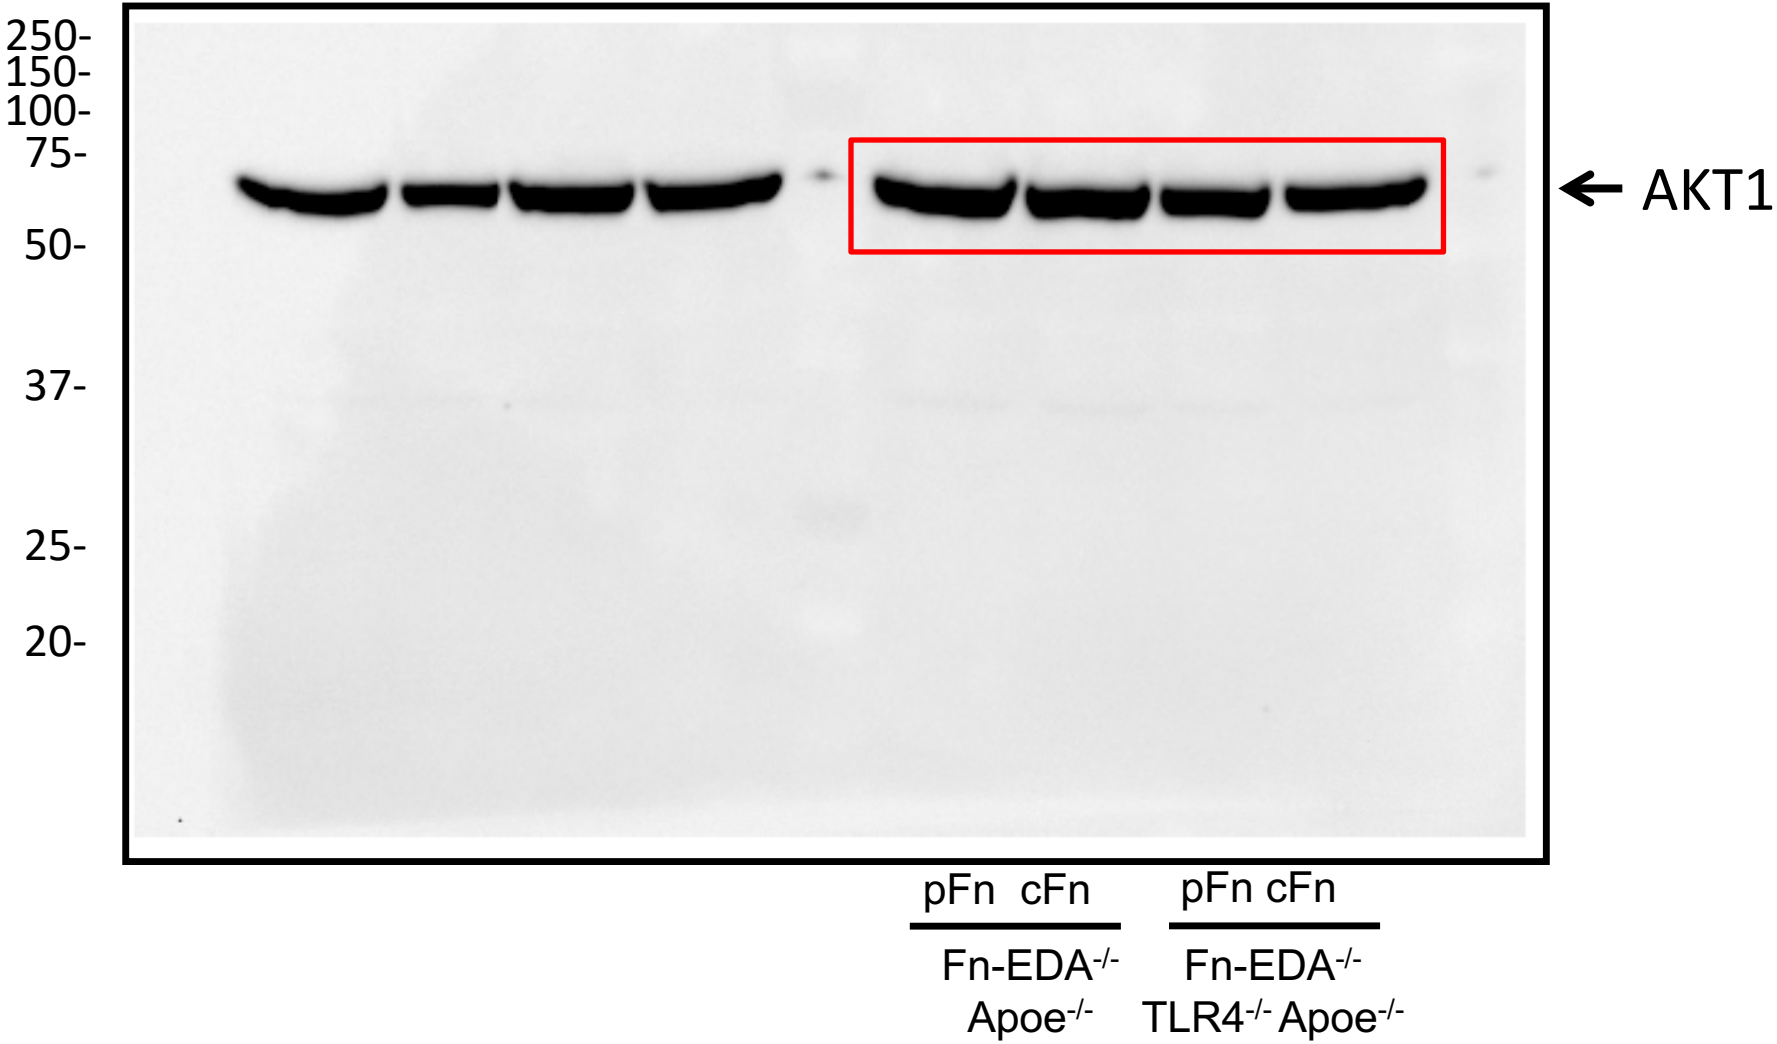

Full unedited gel for Figure 7A-p-NFκB

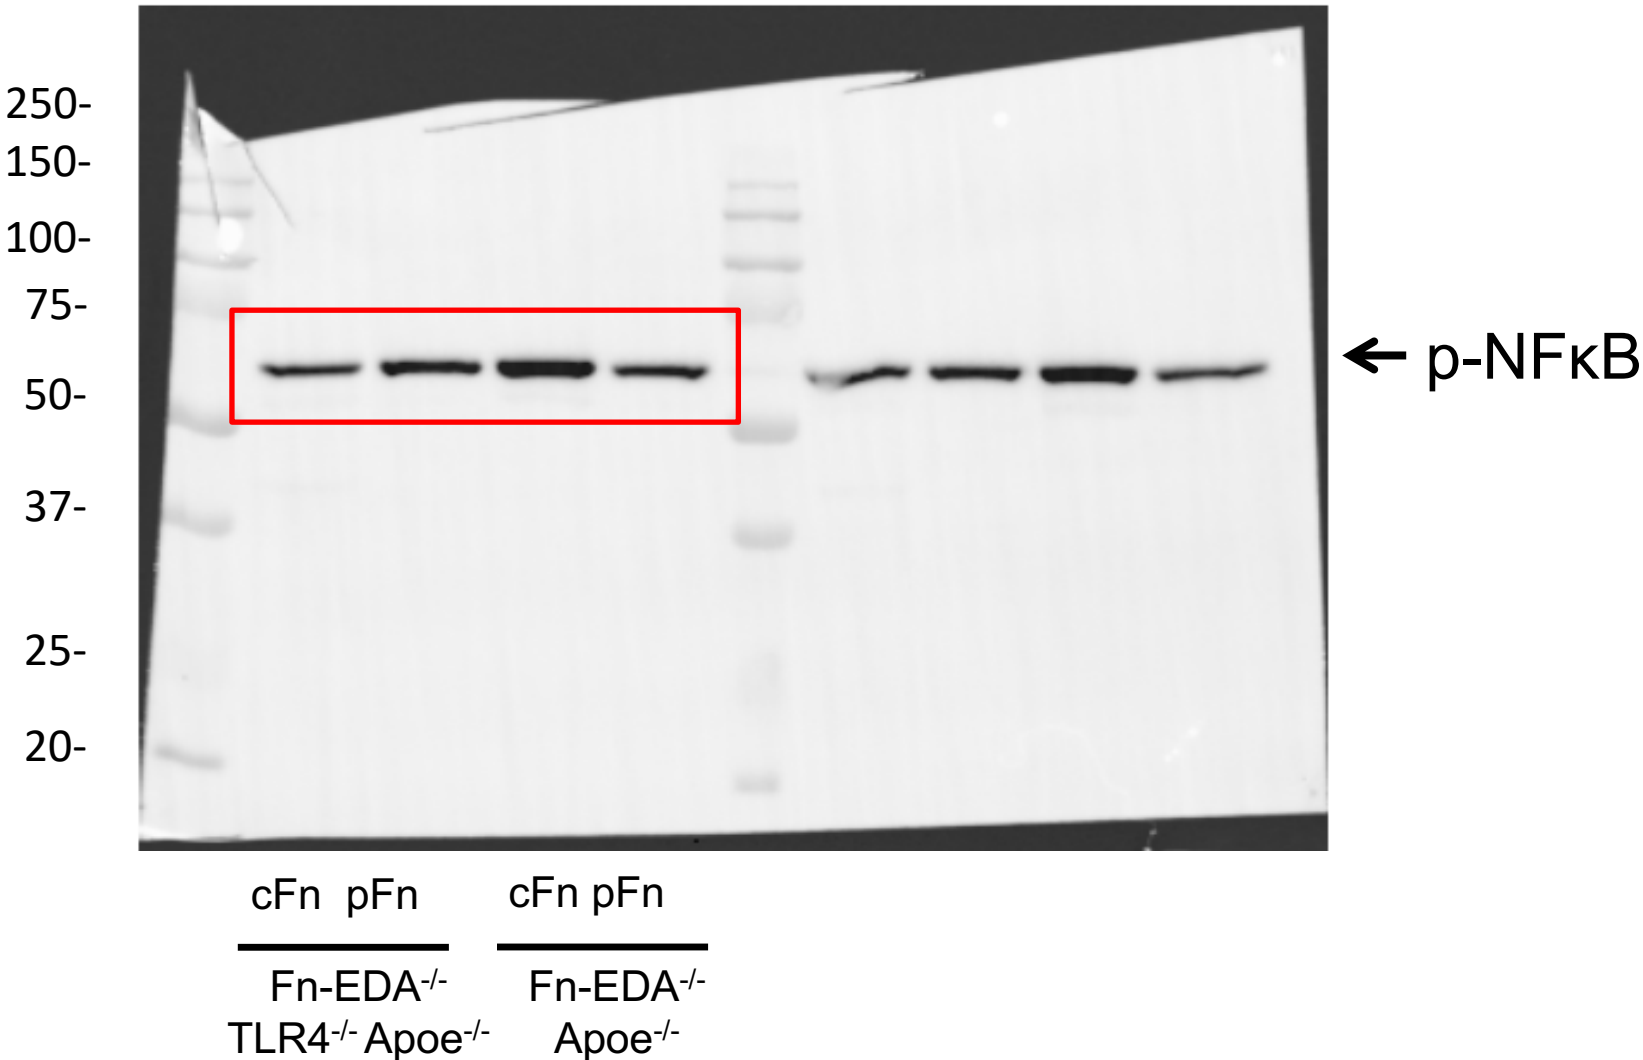

Full unedited gel for Figure 7A-NFκB

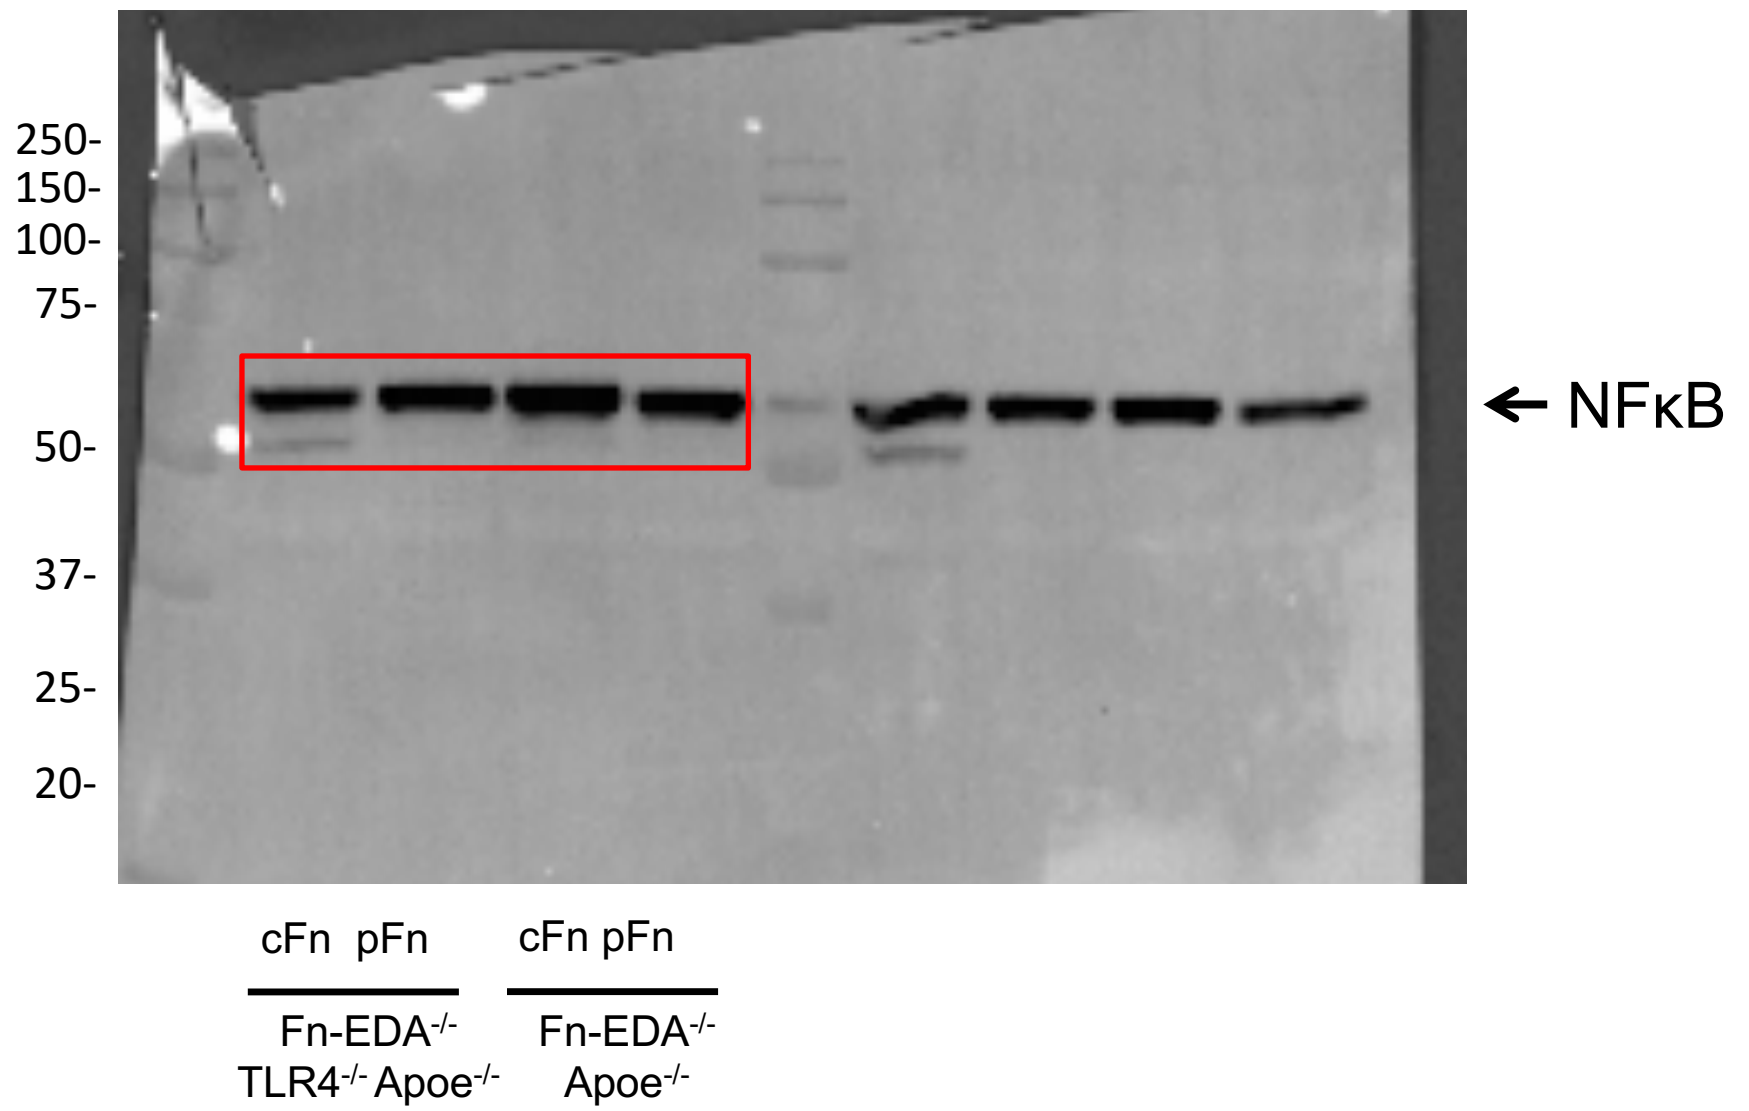

Full unedited gel for Figure 7A-β-actin

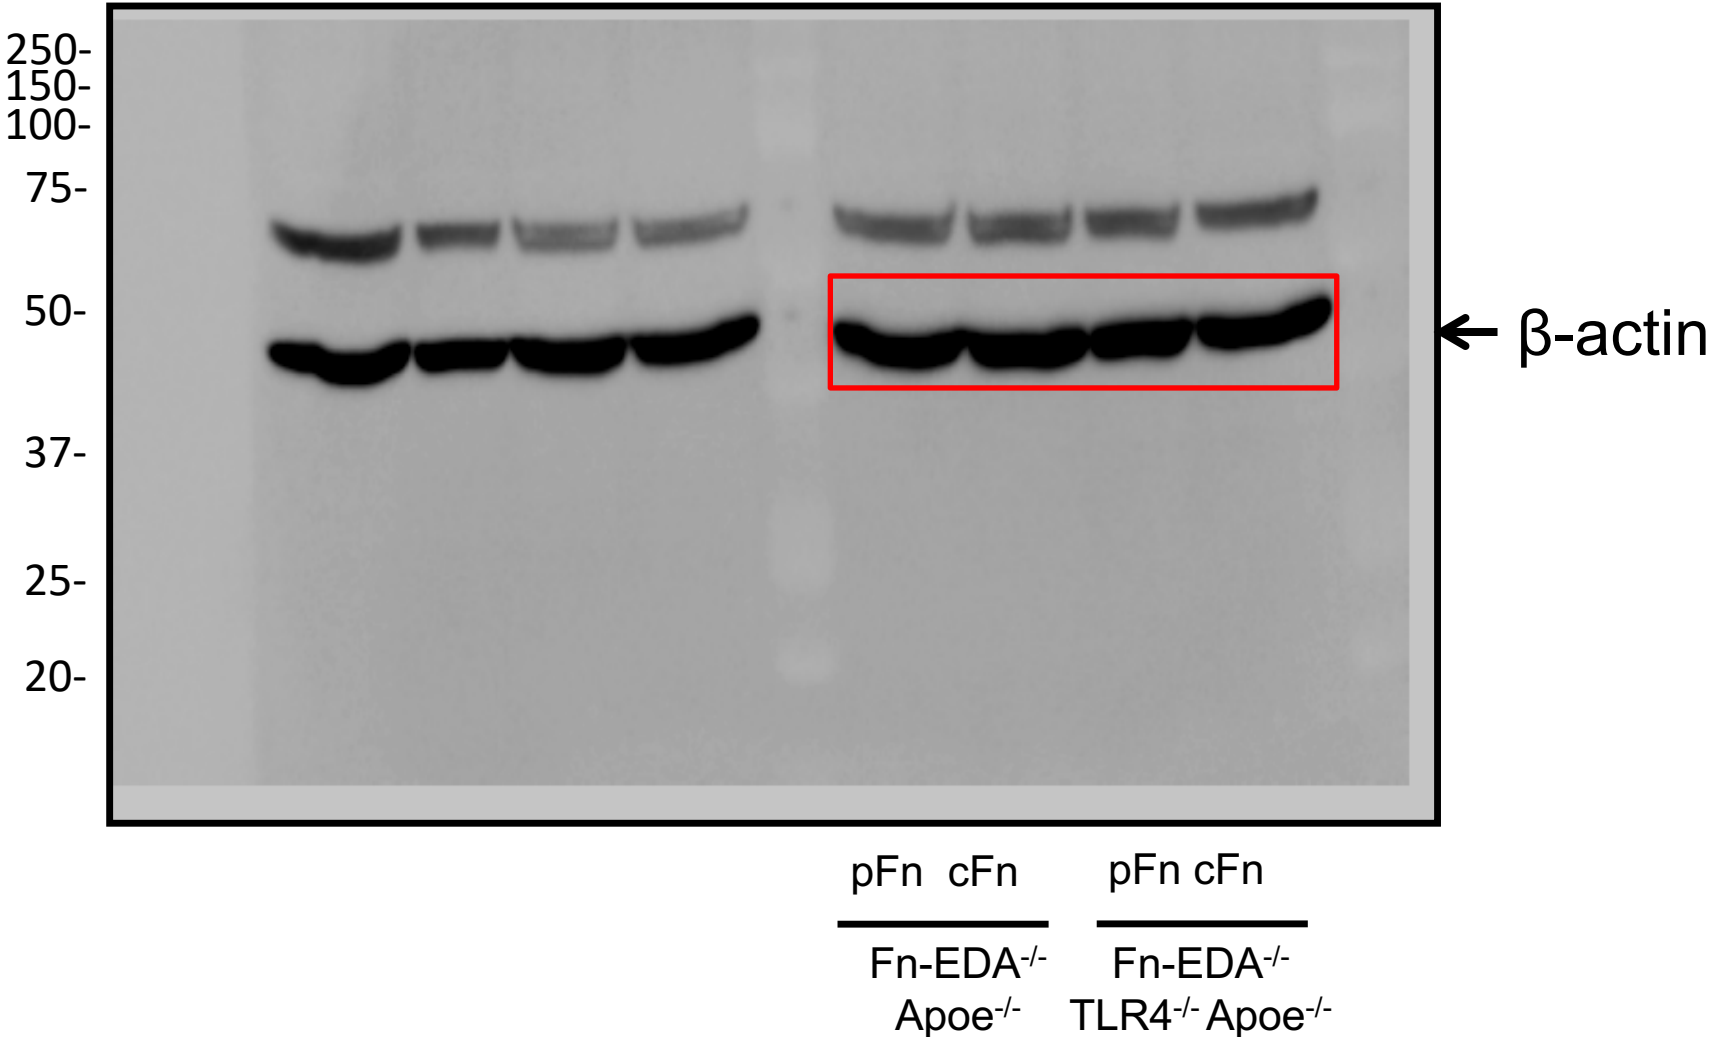

Full unedited gel for Figure 7A-p-AKT2

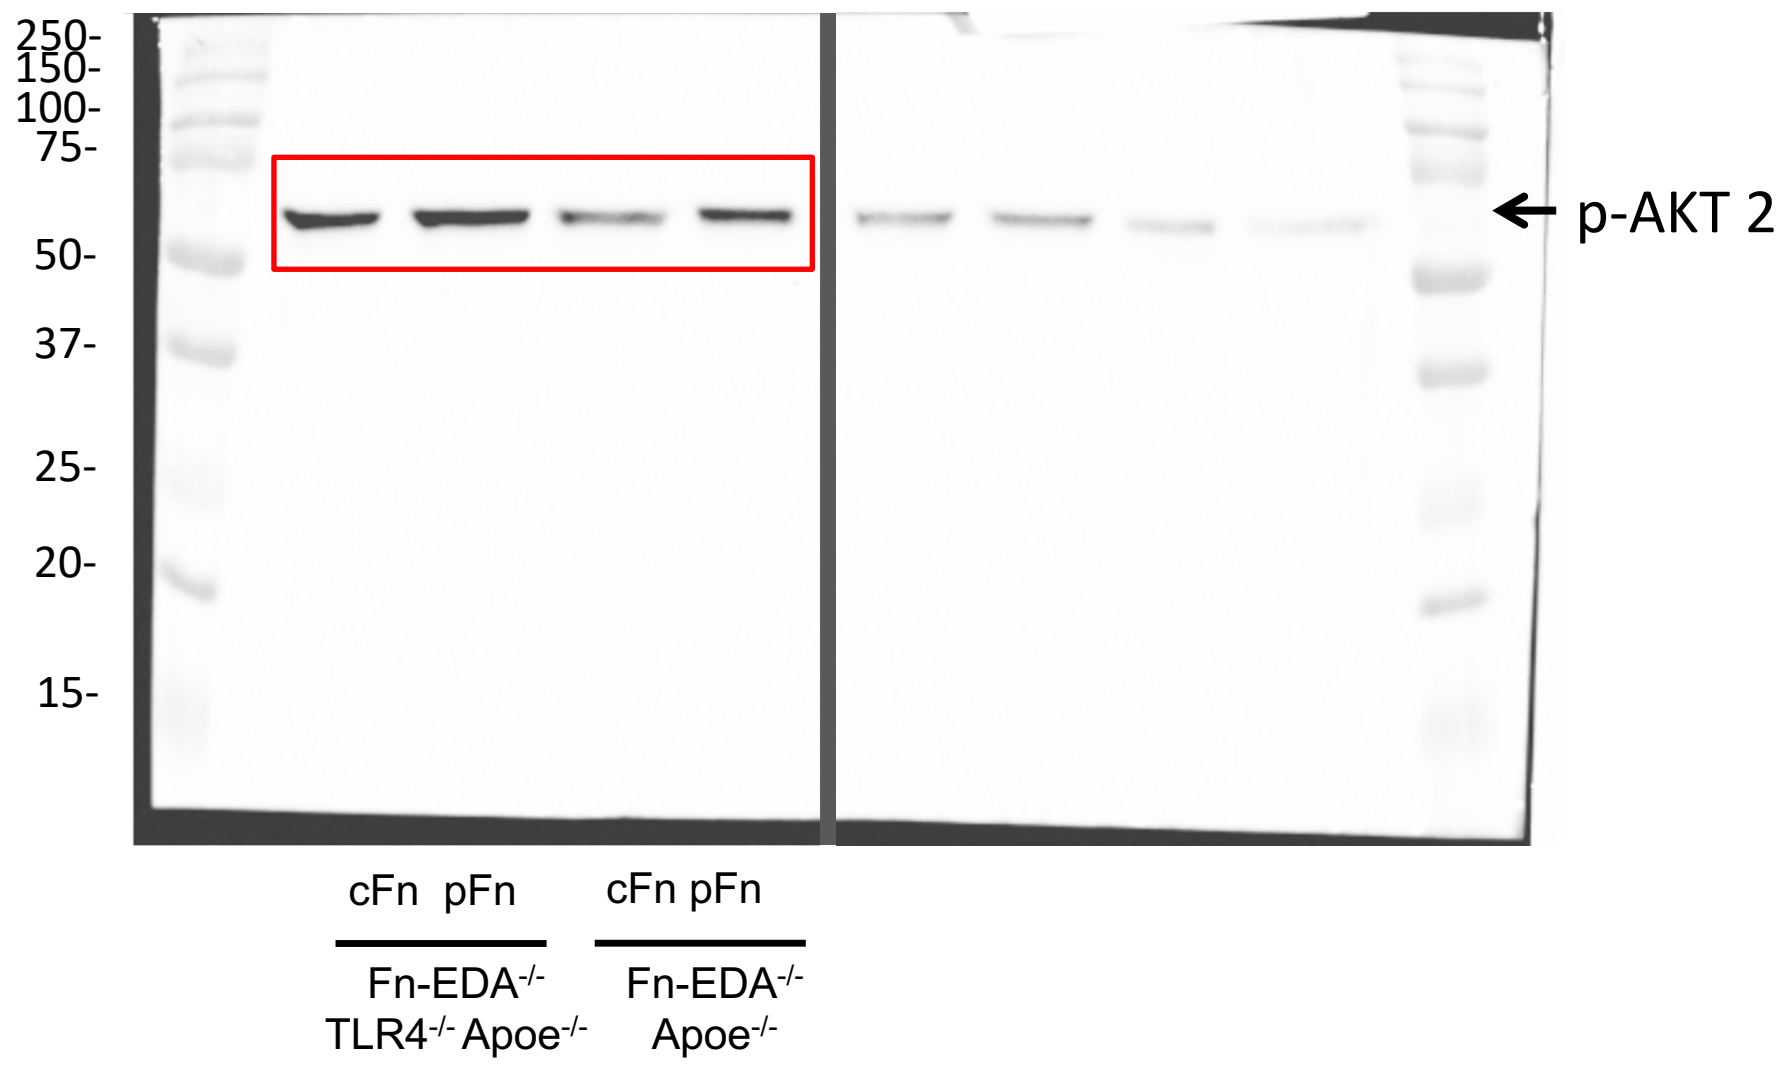

Full unedited gel for Figure 7A-AKT2

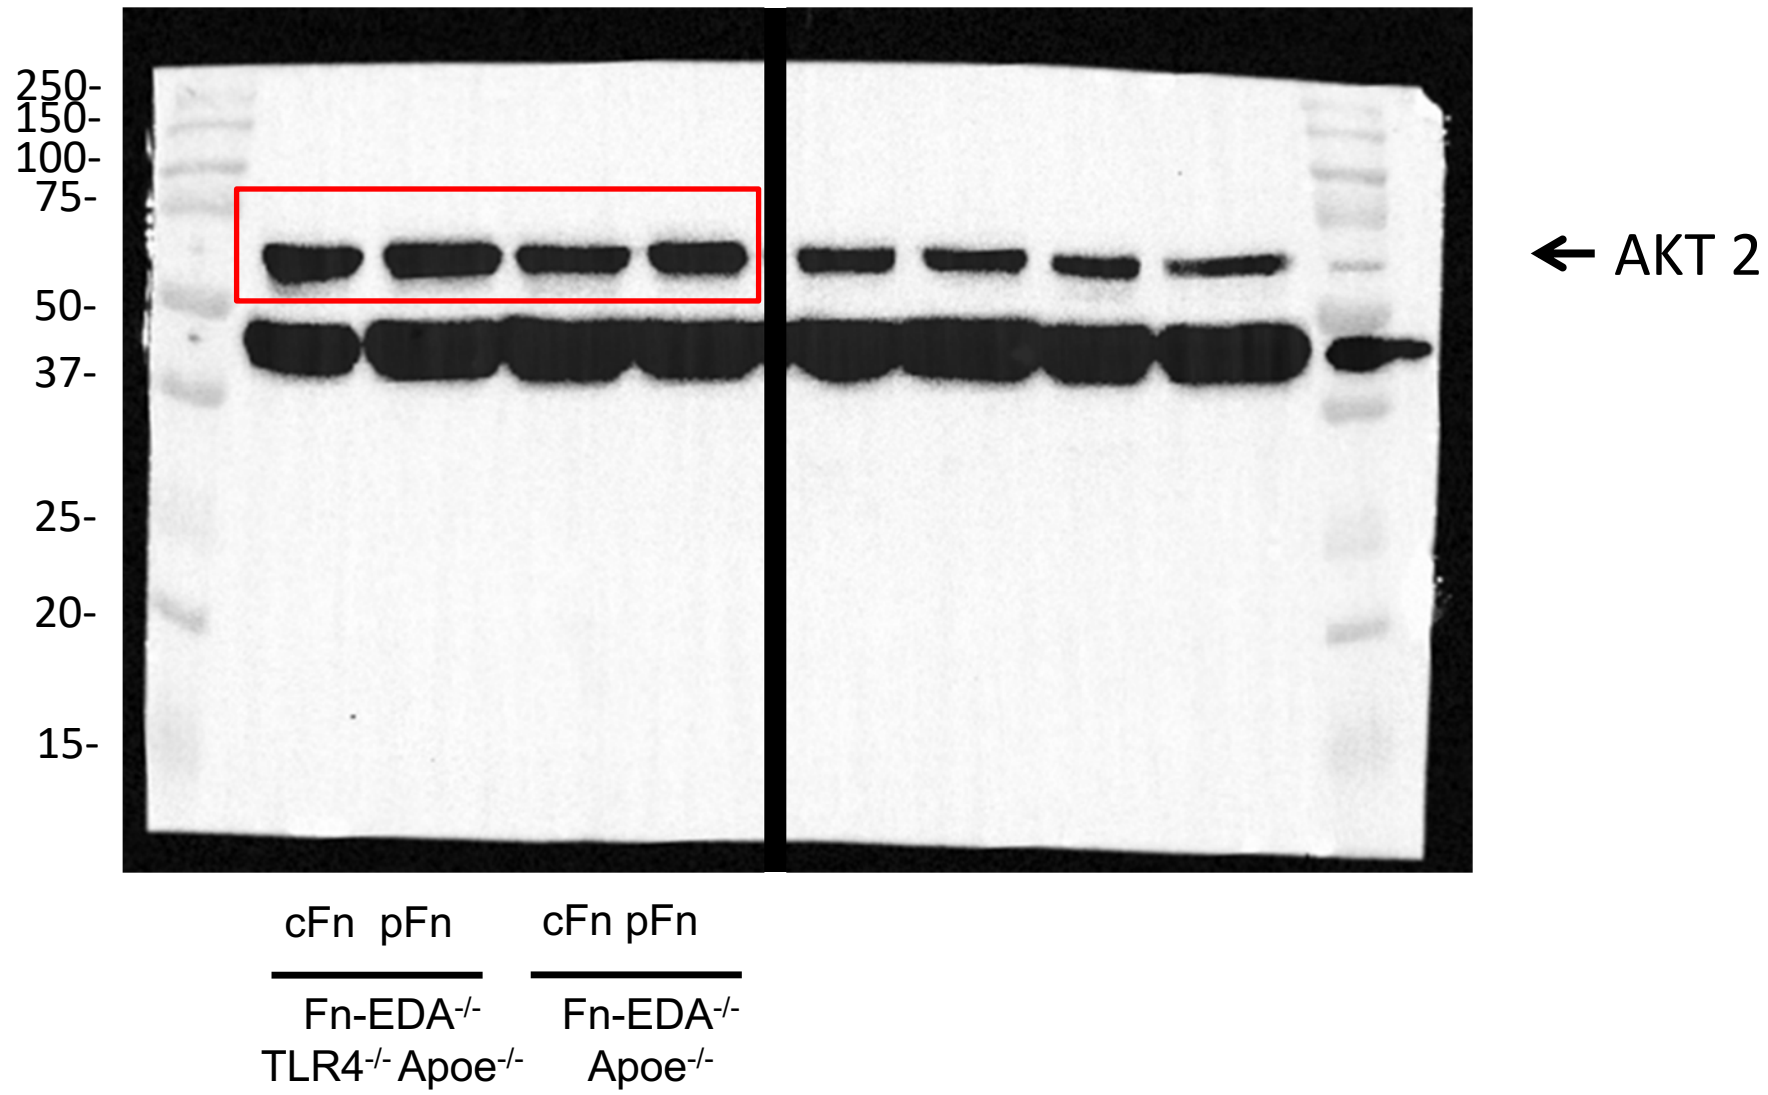

Full unedited gel for Figure 7A-  $\beta$ -actin

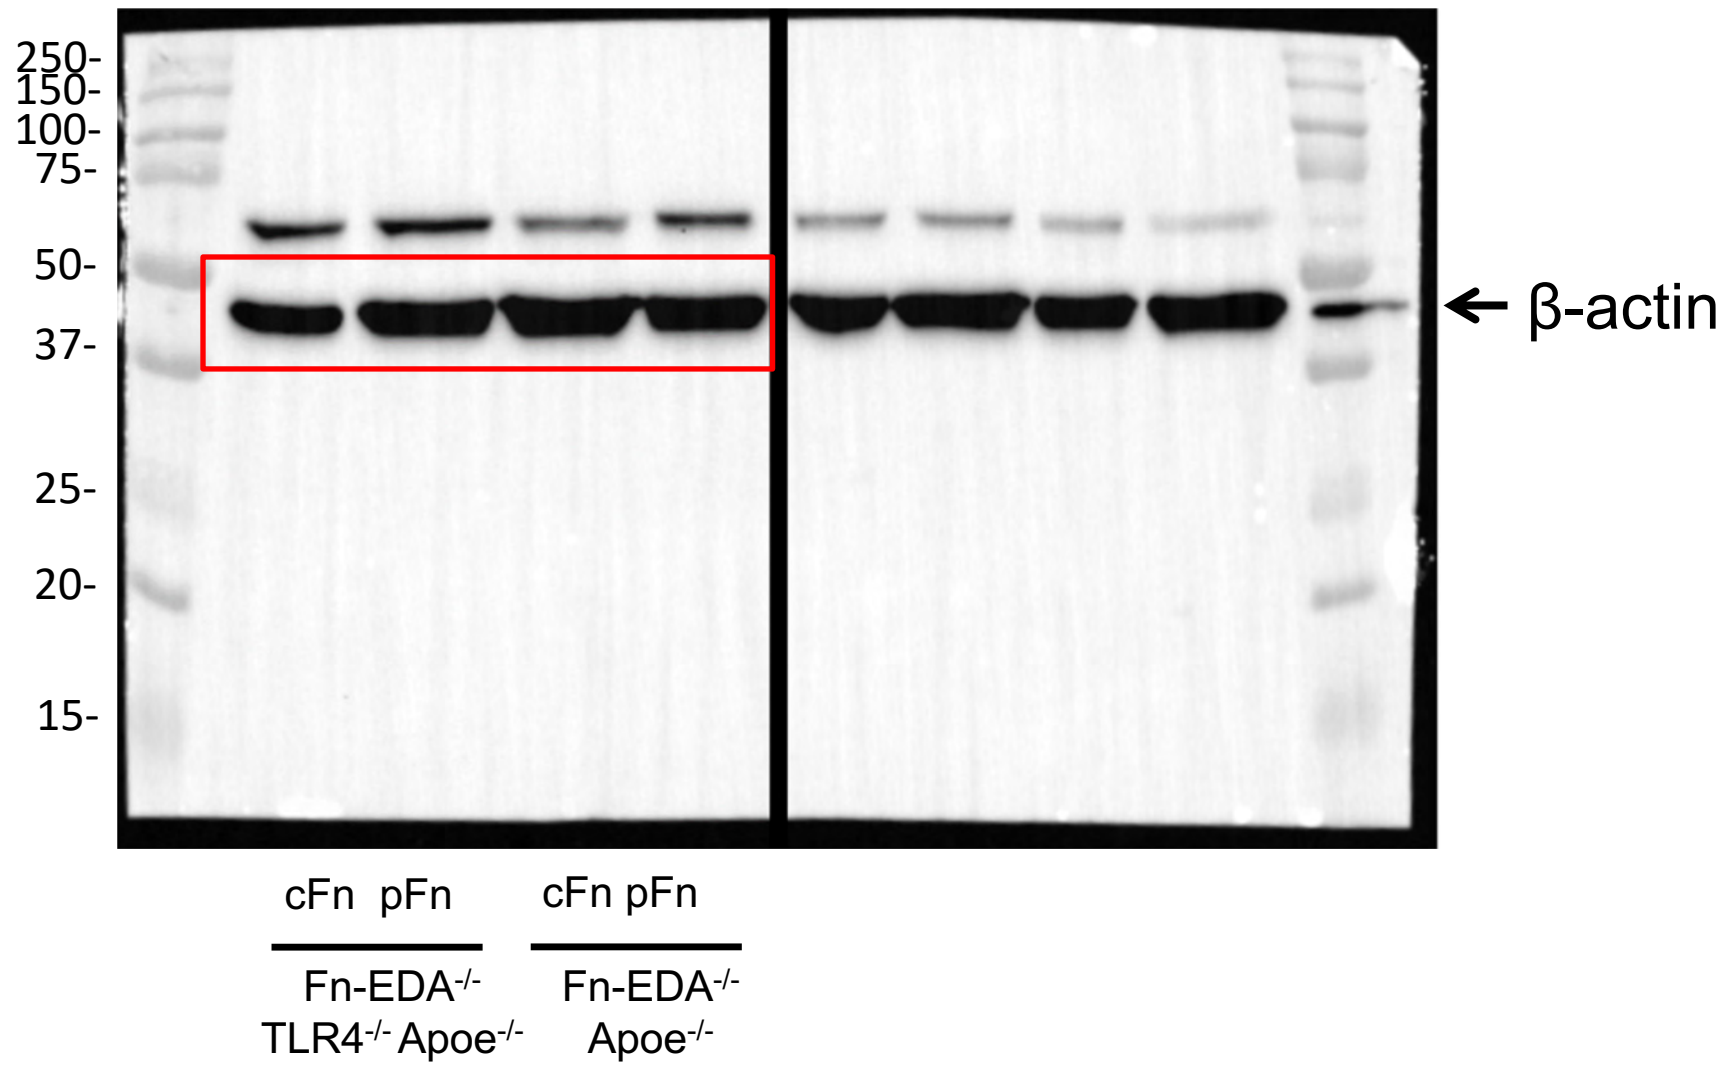

Full unedited gel for Figure 7A-p-mTOR

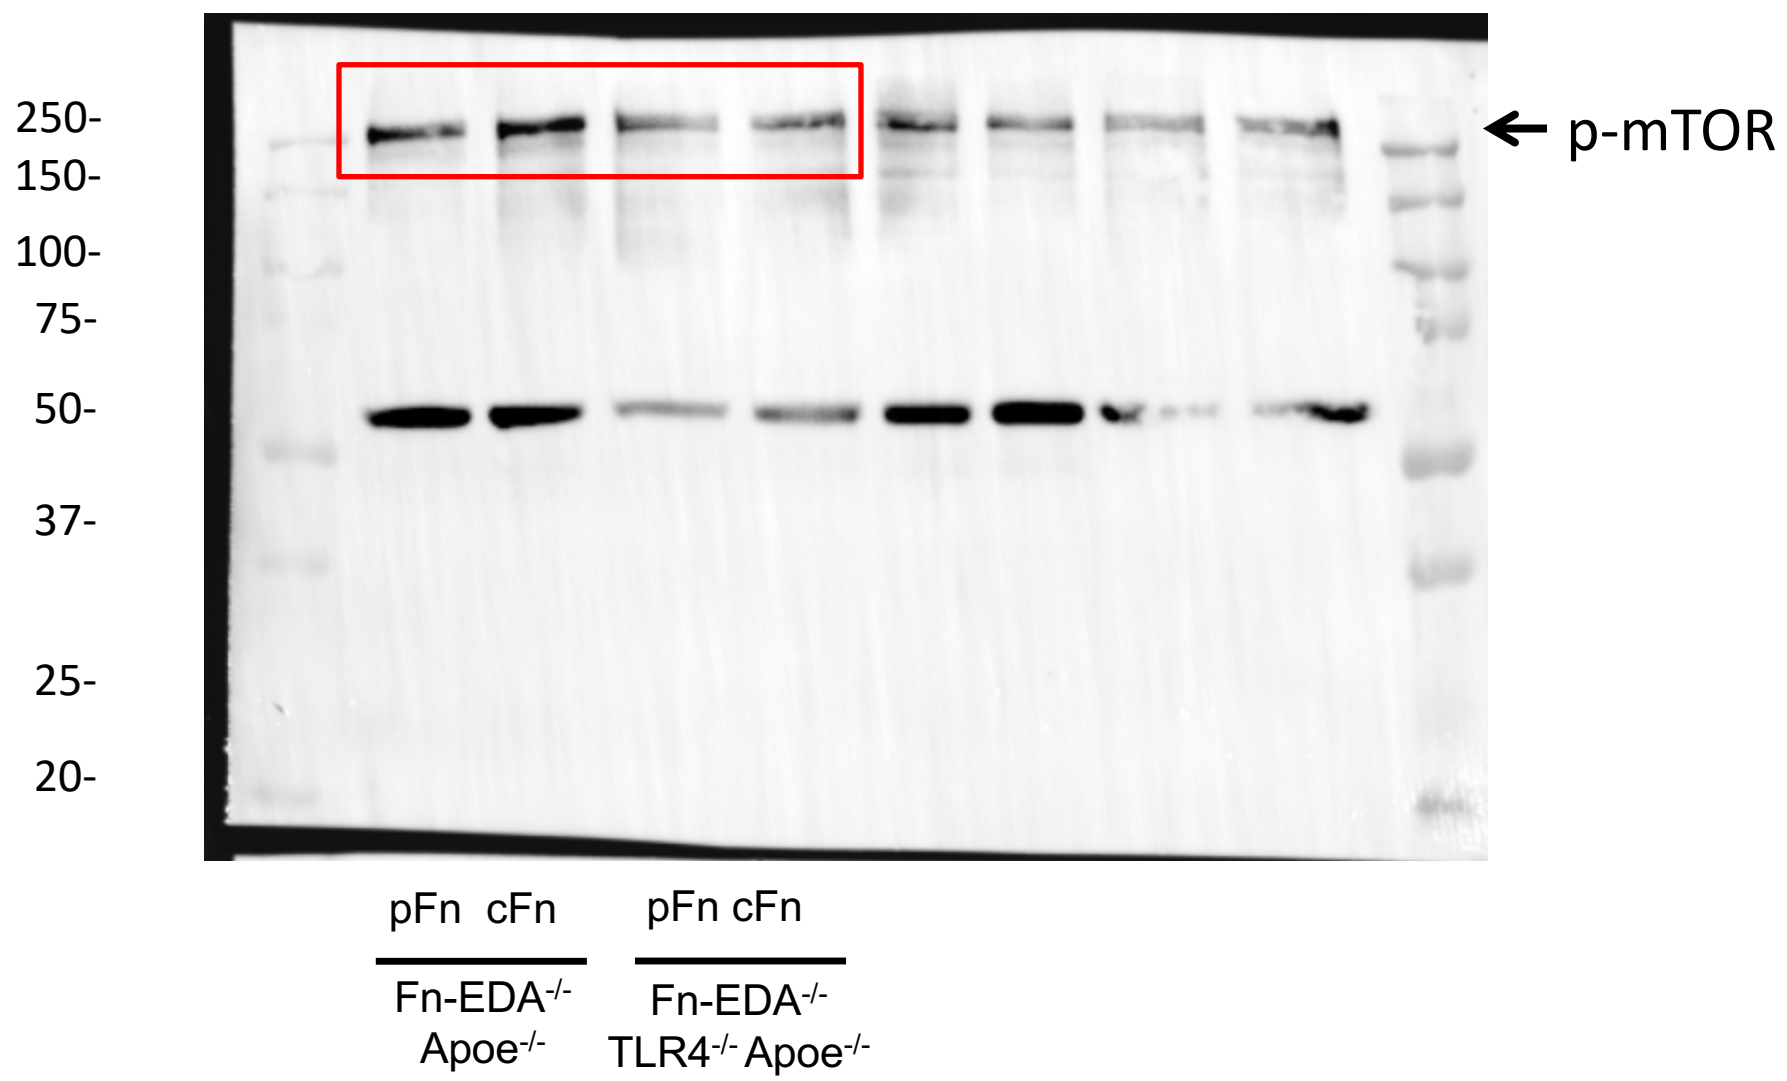



Full unedited gel for Figure 7A-mTOR

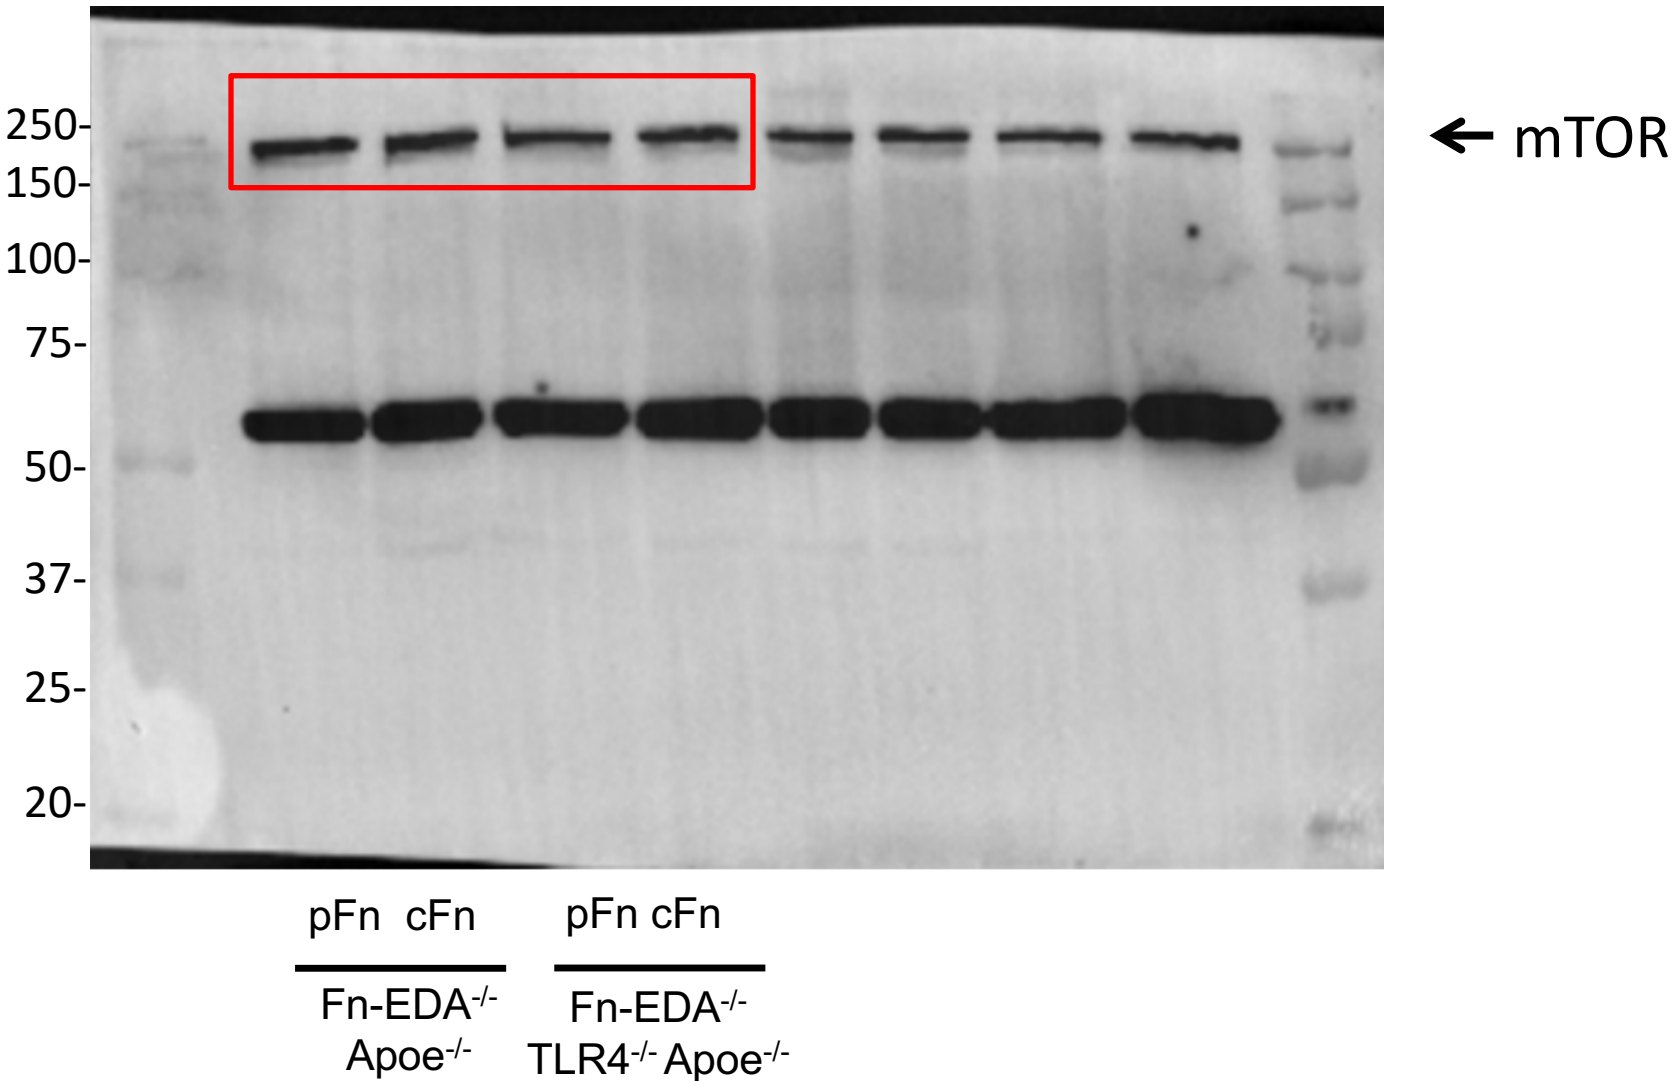

Full unedited gel for Figure 7A-β-actin

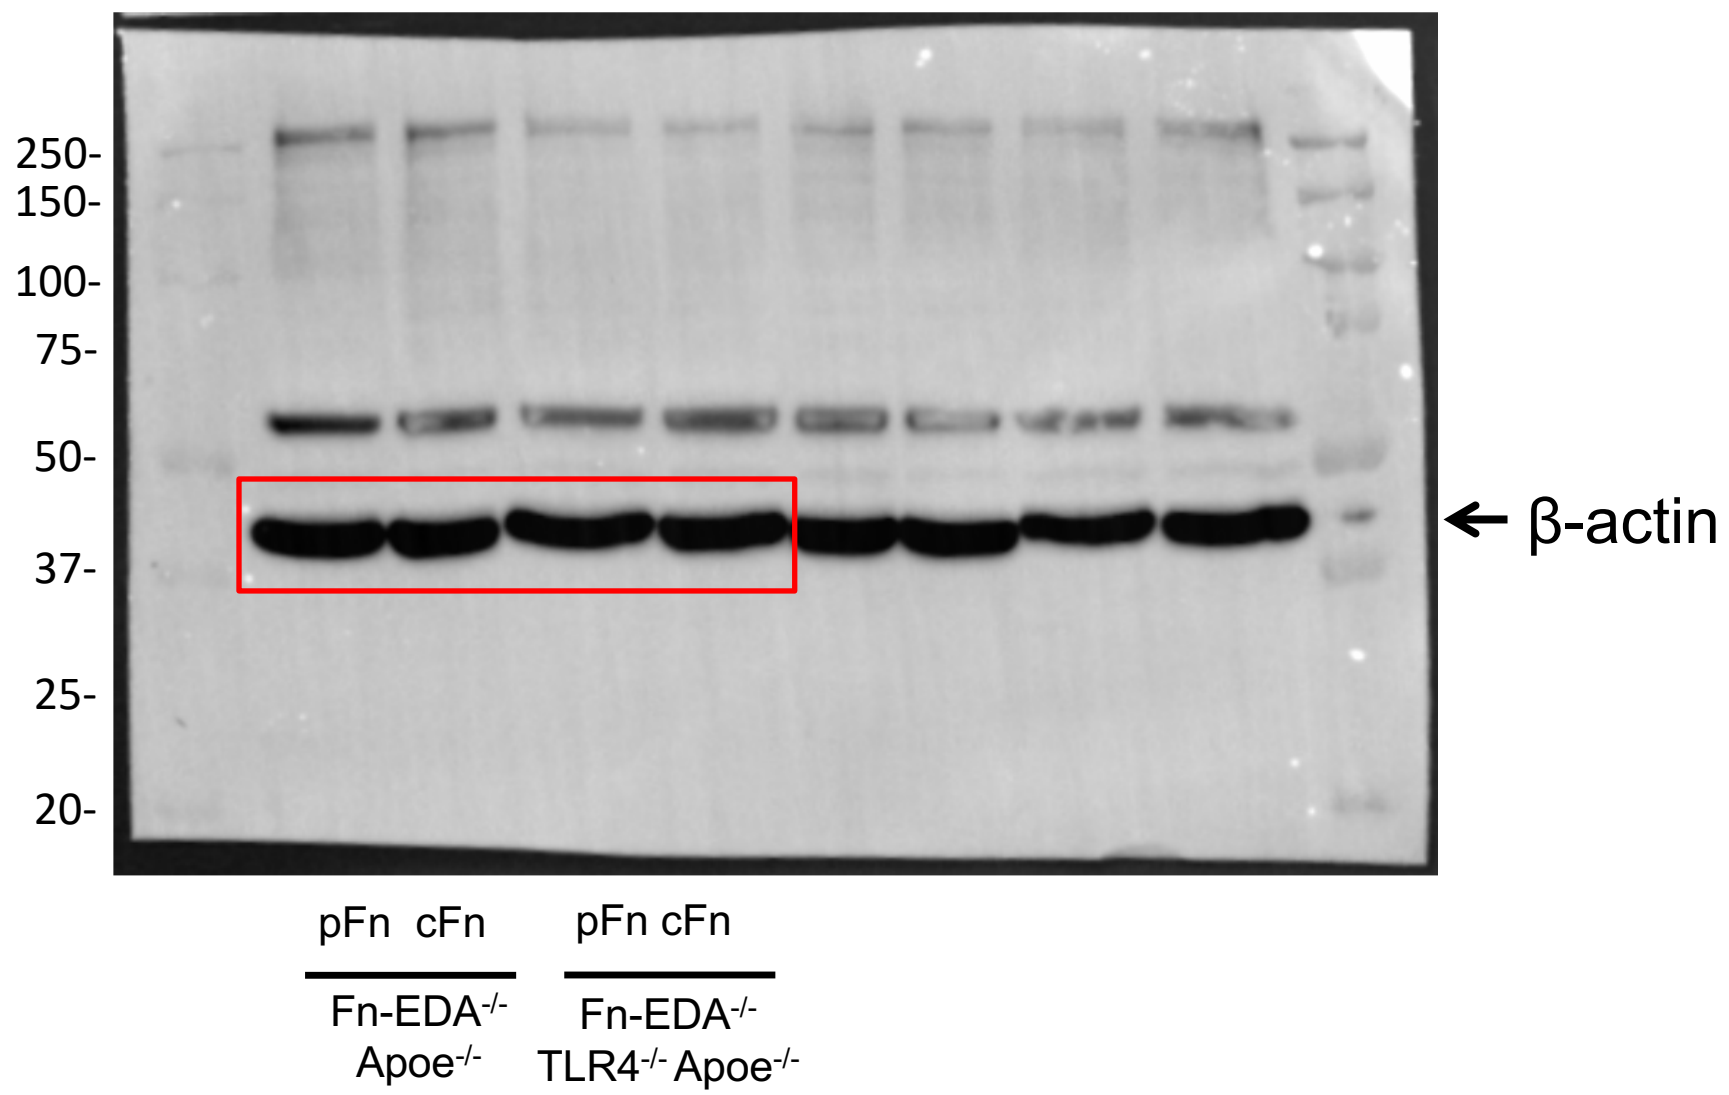

Full unedited gel for Figure 9D-p-AKT1 (left) and Total AKT1 (right)

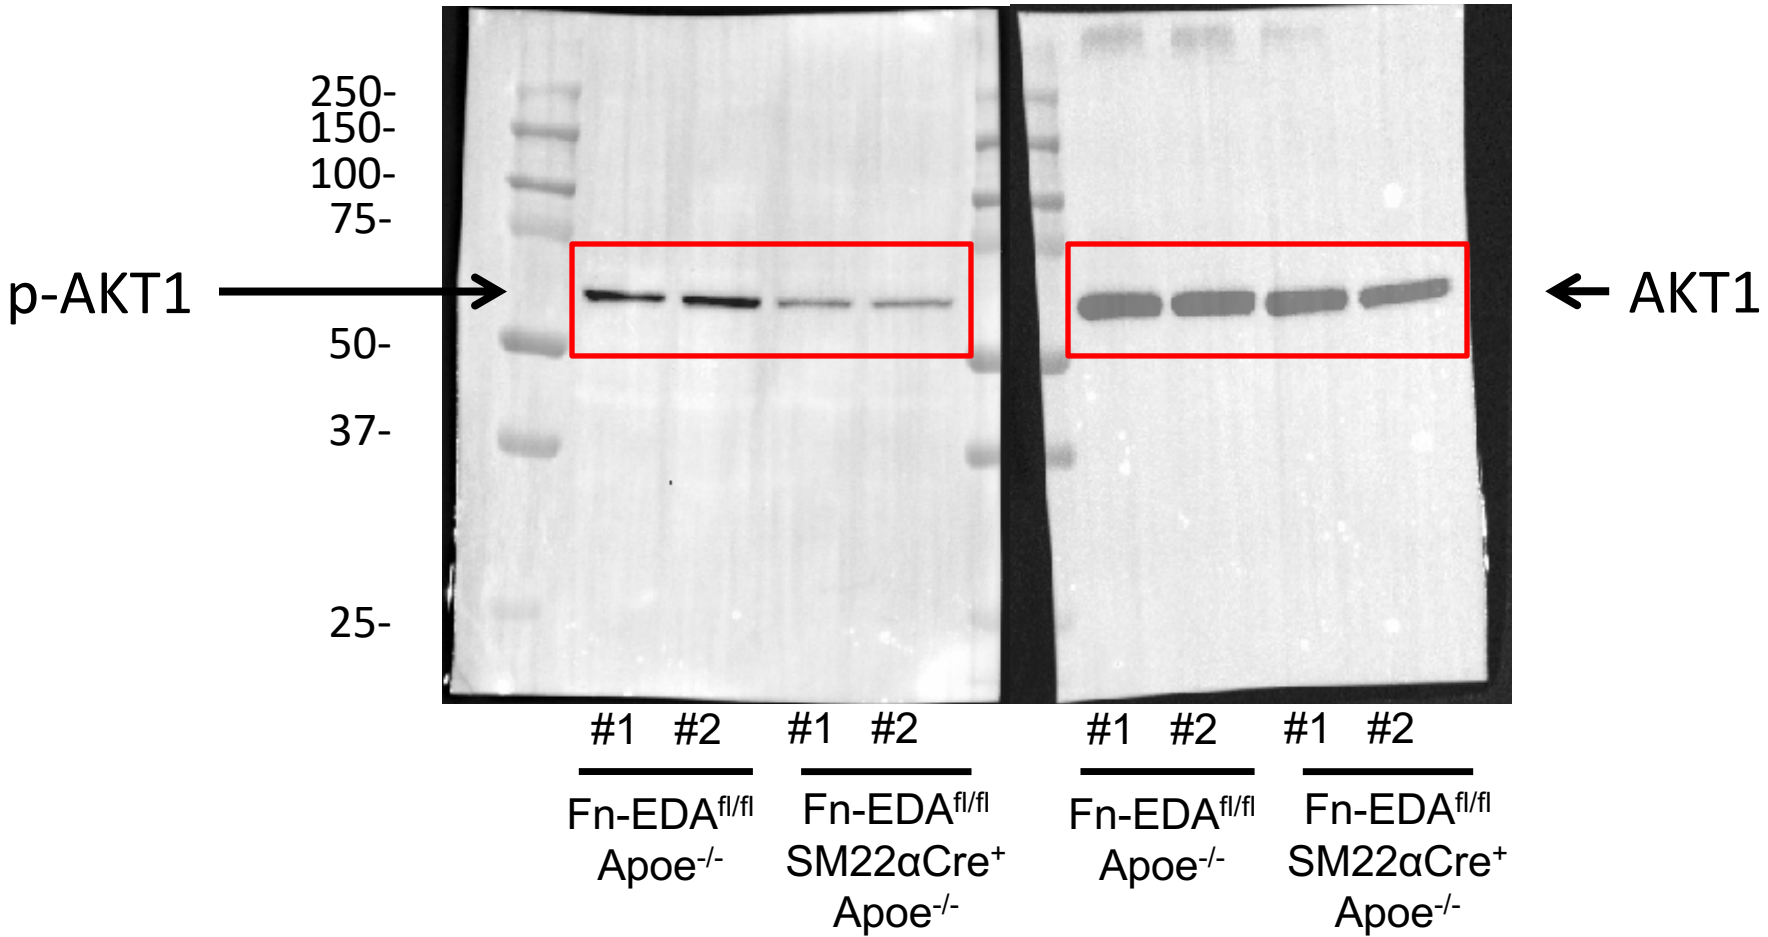

Full unedited gel for Figure 9D-p-AKT2 (left) and Total AKT2 (right)

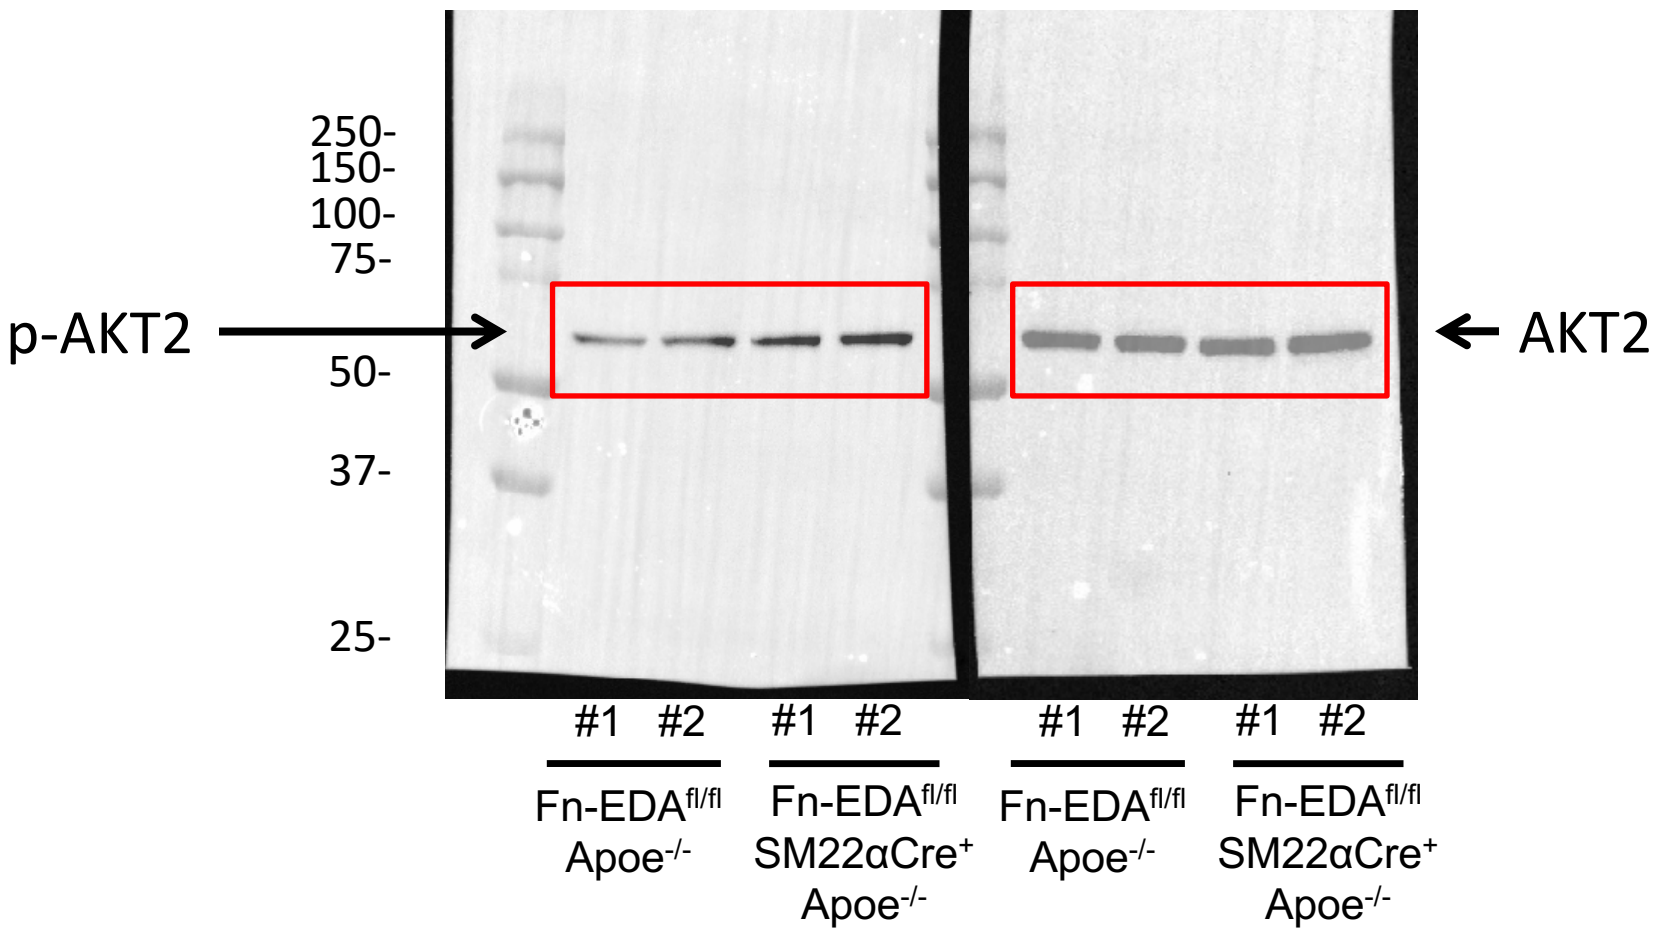

Full unedited gel for Figure 9D-p-mTOR (left) and Total mTOR (right)

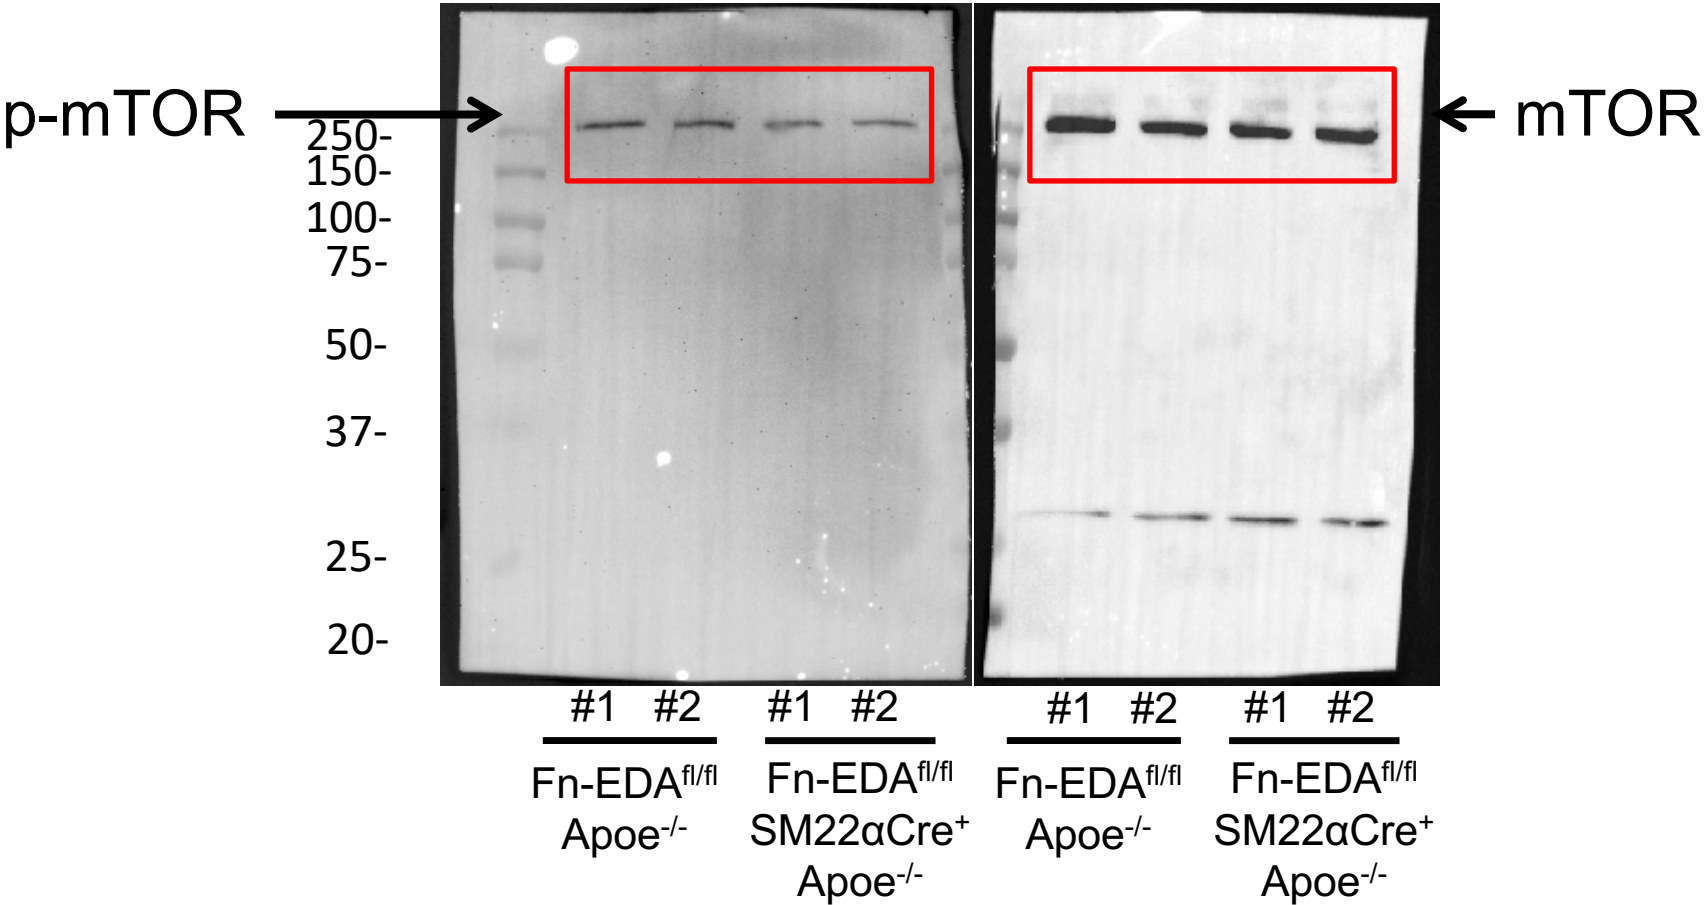

Full unedited gel for Figure 9D-p-NFκB (left) and Total NFκB (right)

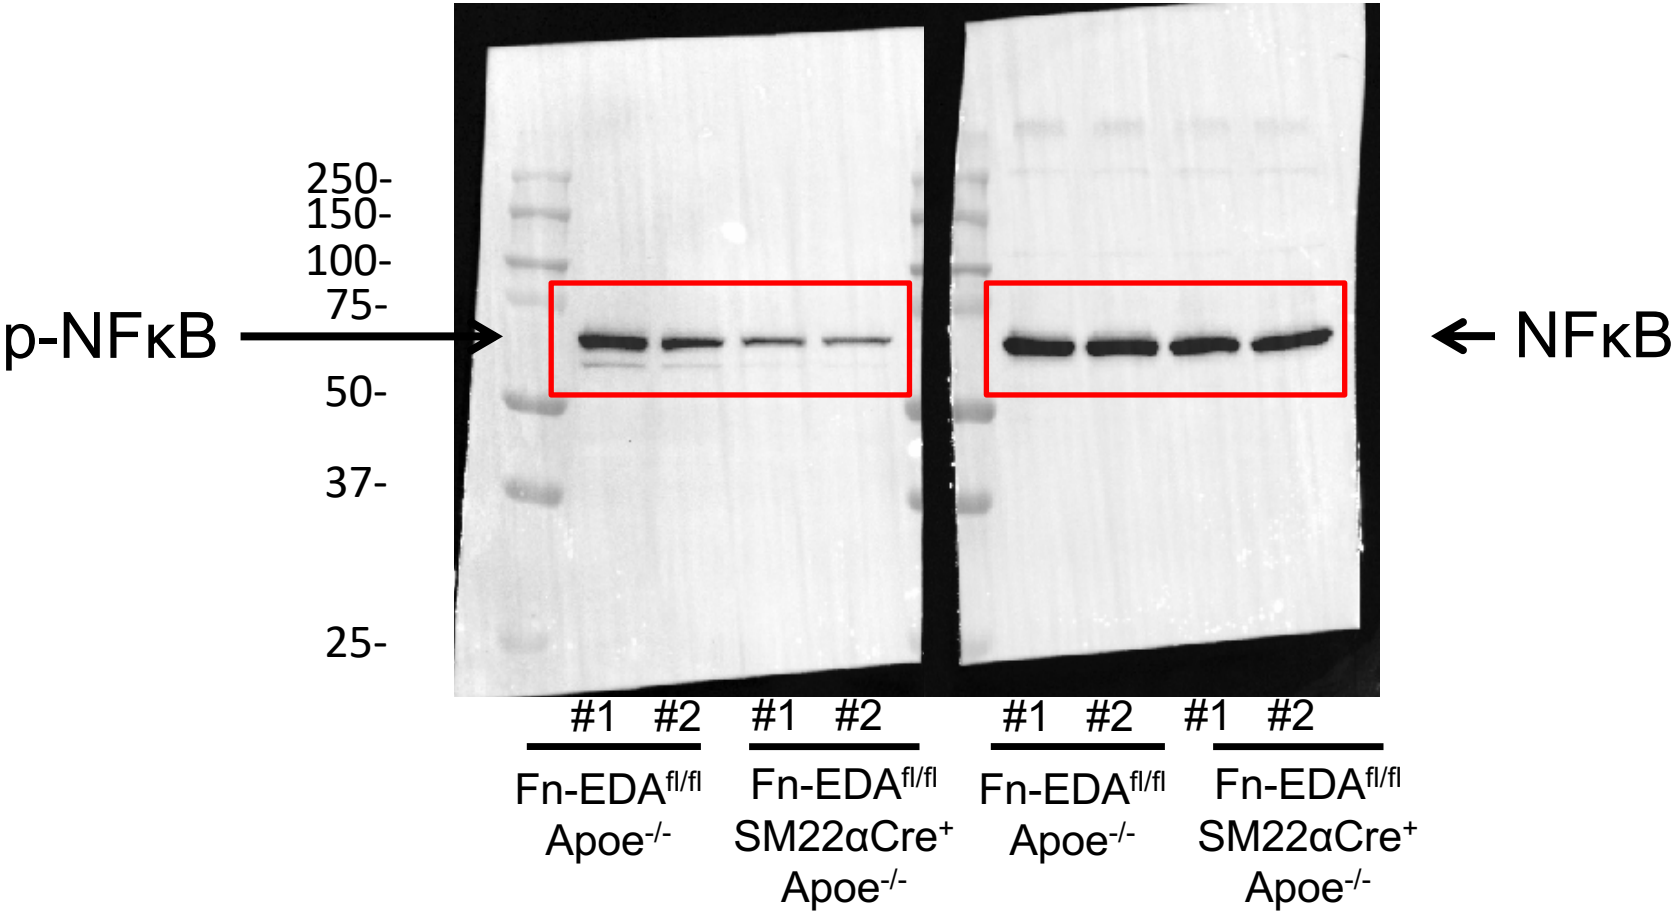

Full unedited gel for Figure 9D-β-actin

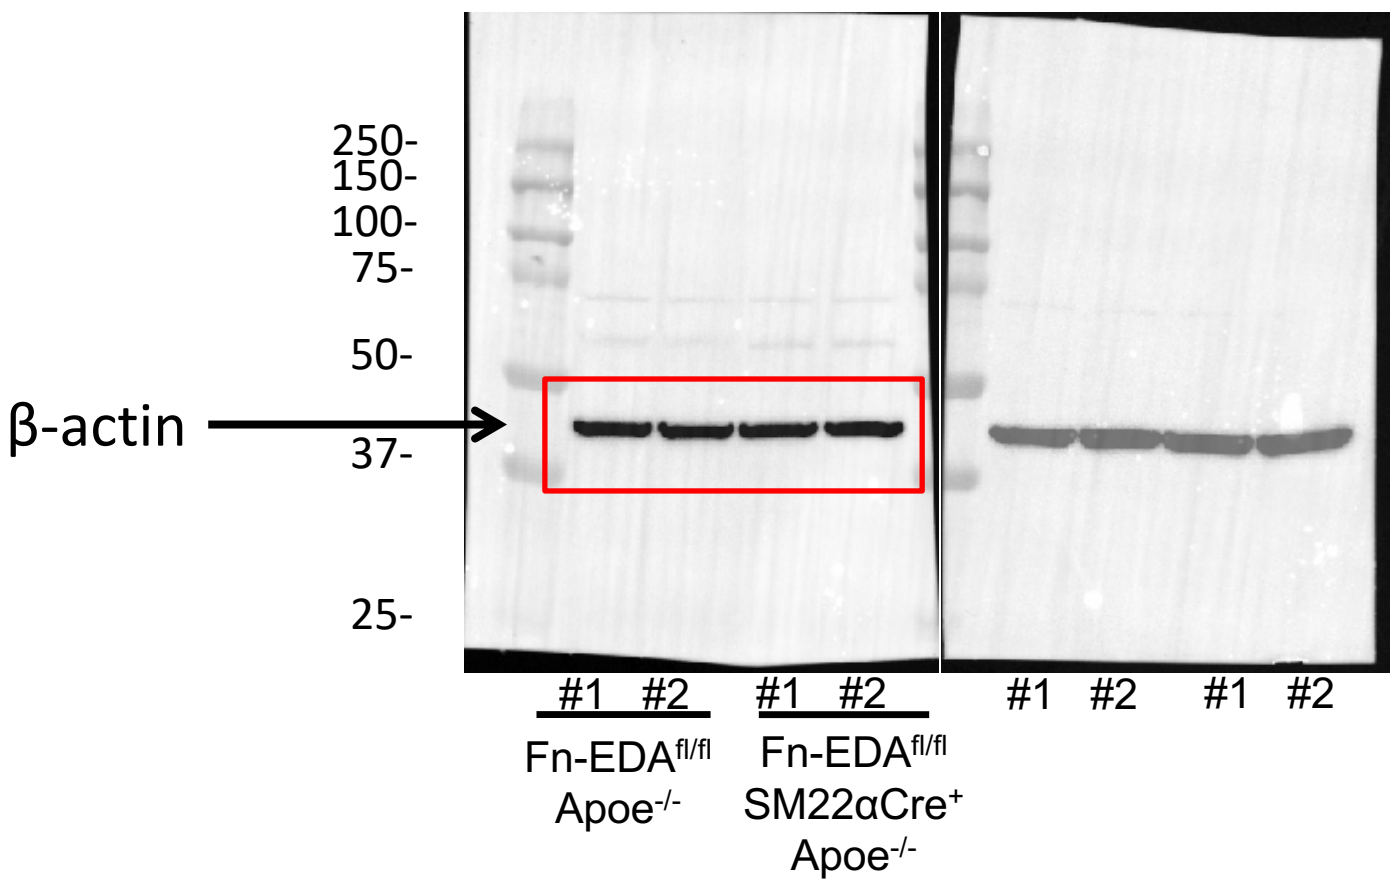

Full unedited gel for Figure 10C-SM22α

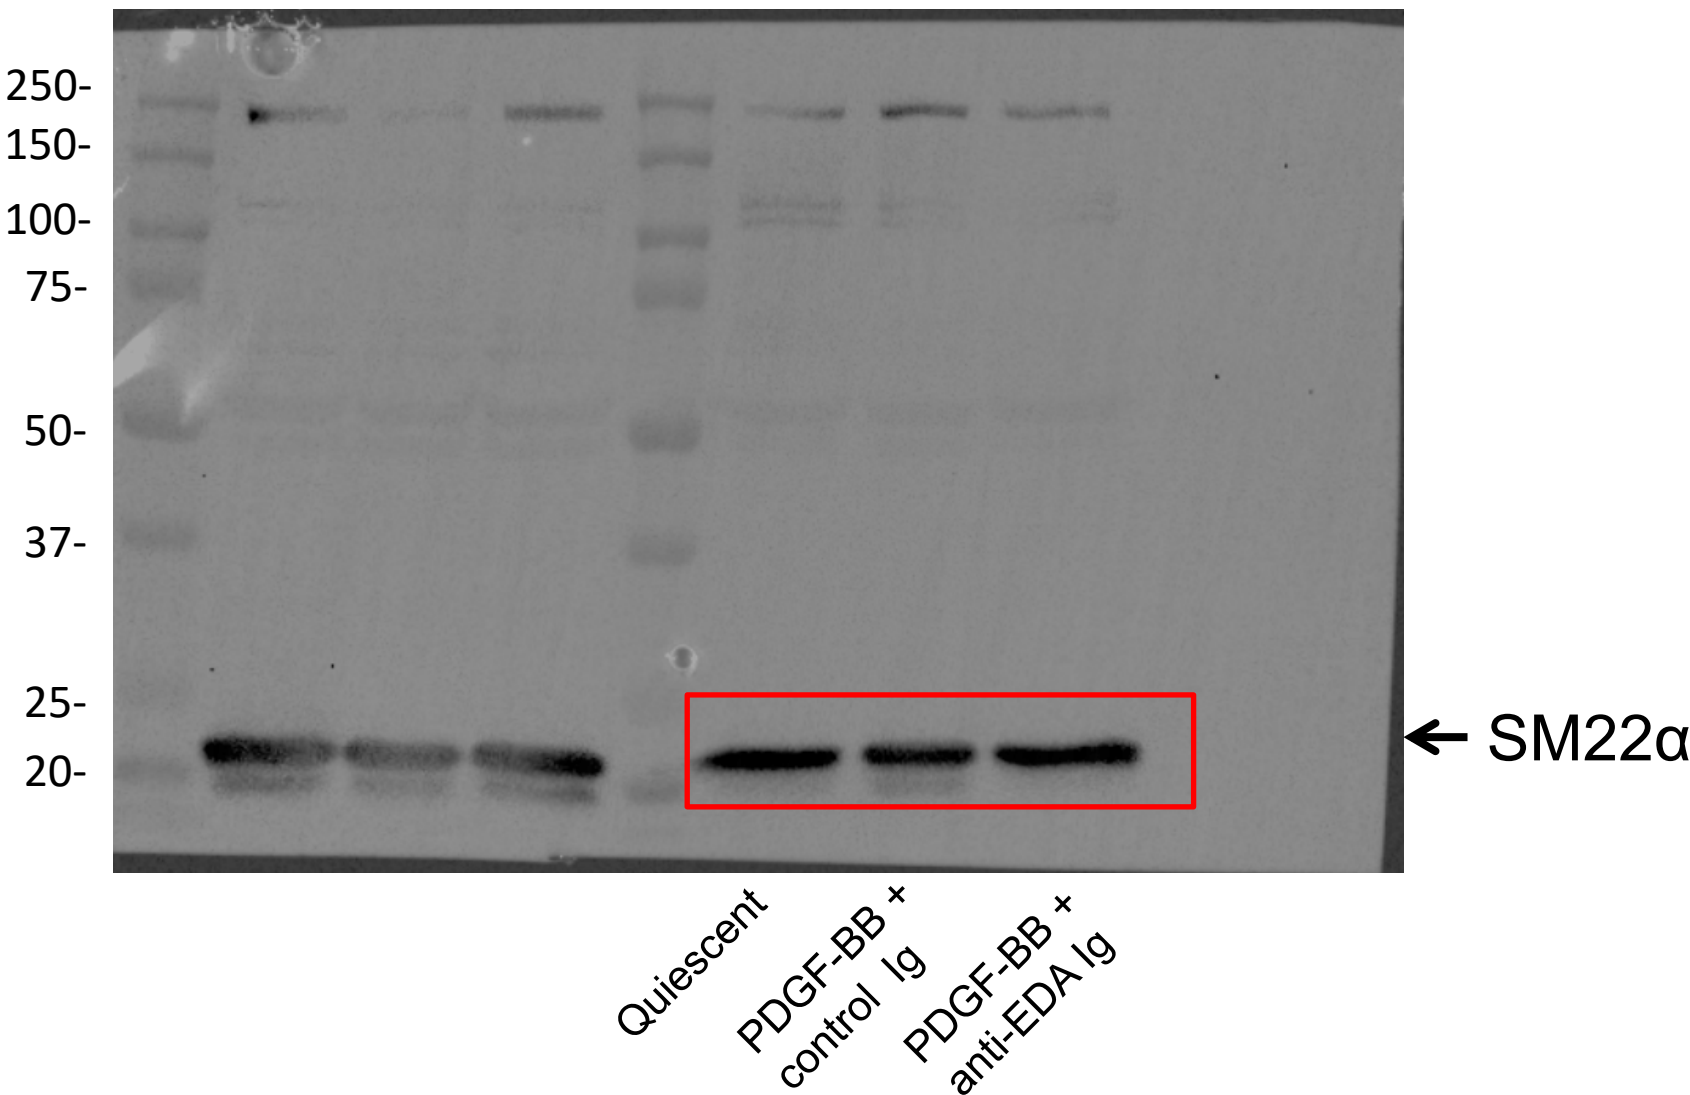



Full unedited gel for Figure 10C-Osteopontin

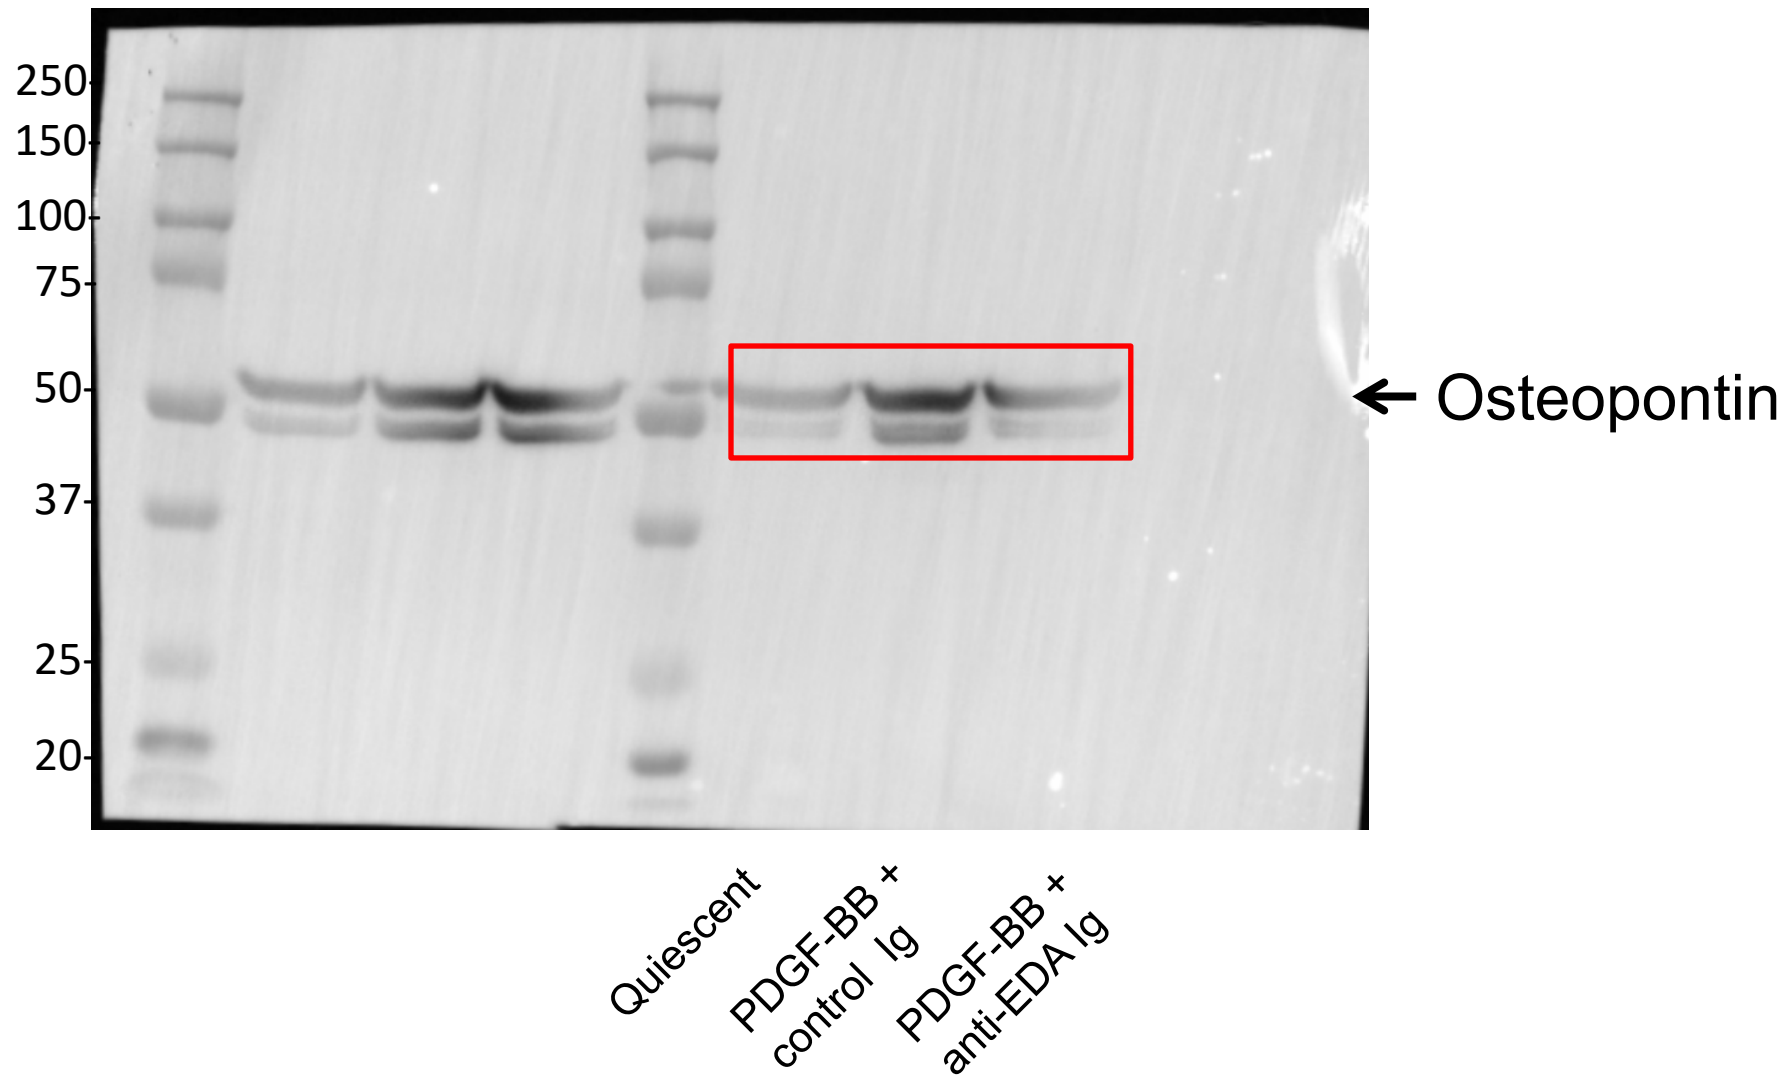

Full unedited gel for Figure 10C-SM-MHC

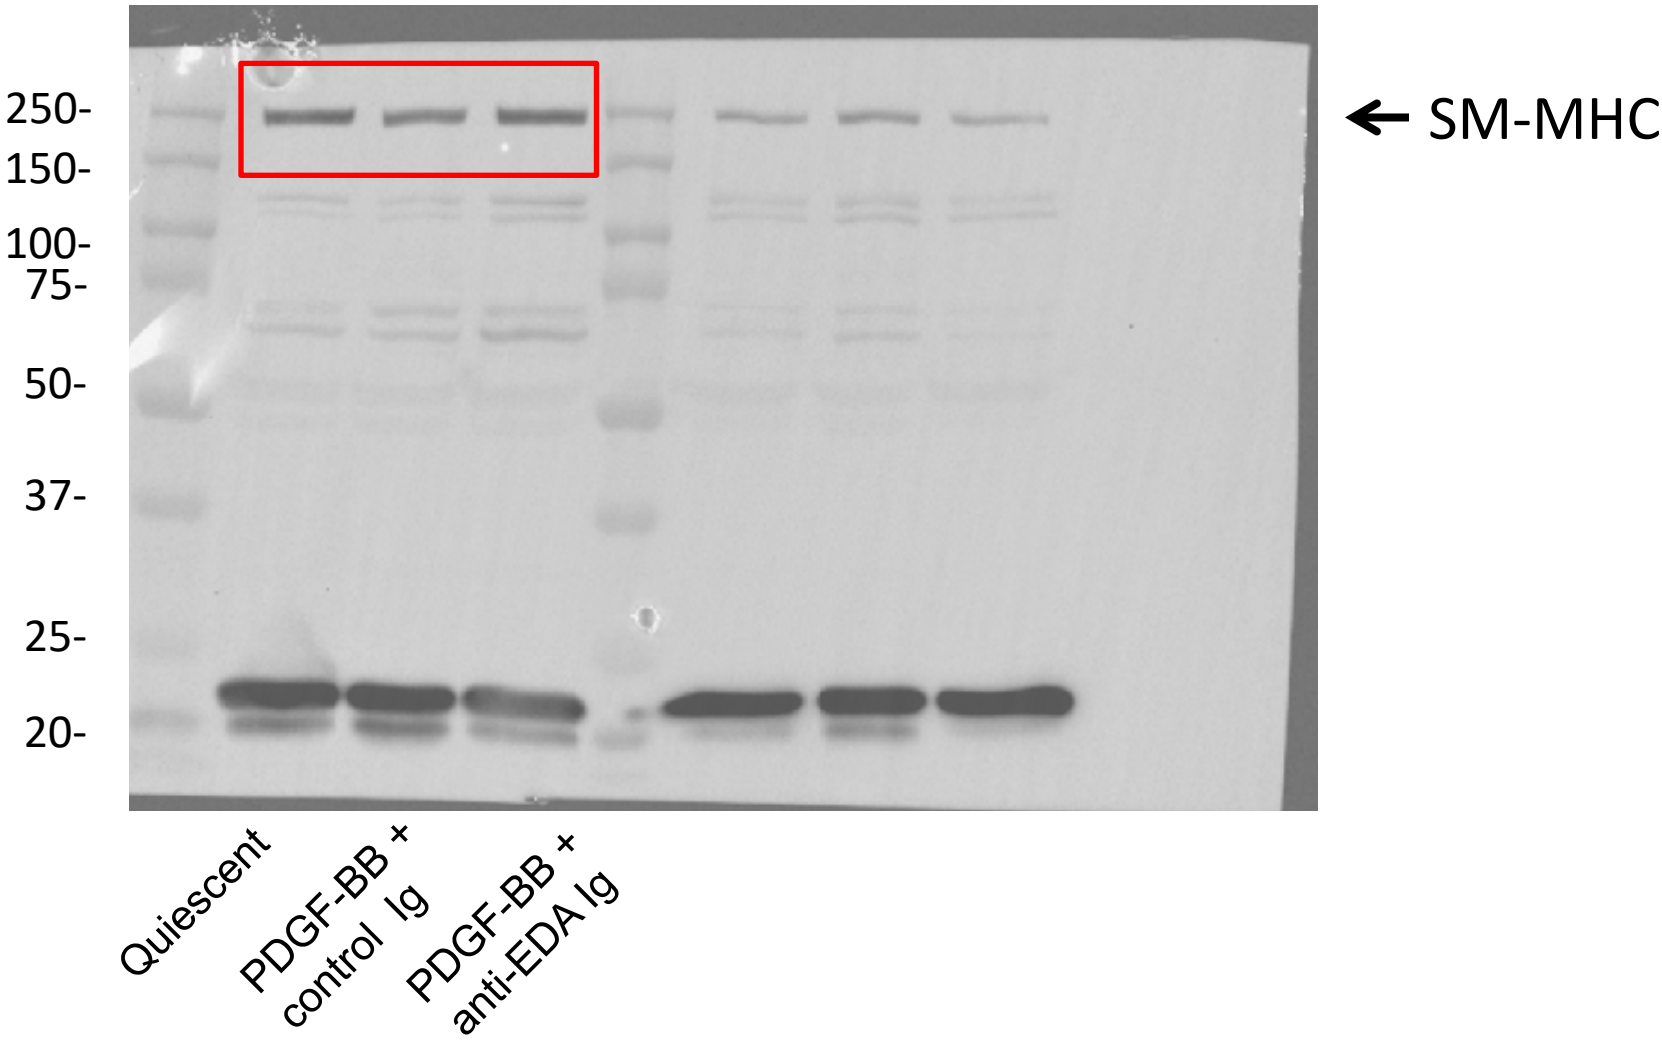

Full unedited gel for Figure 10C-Vimentin

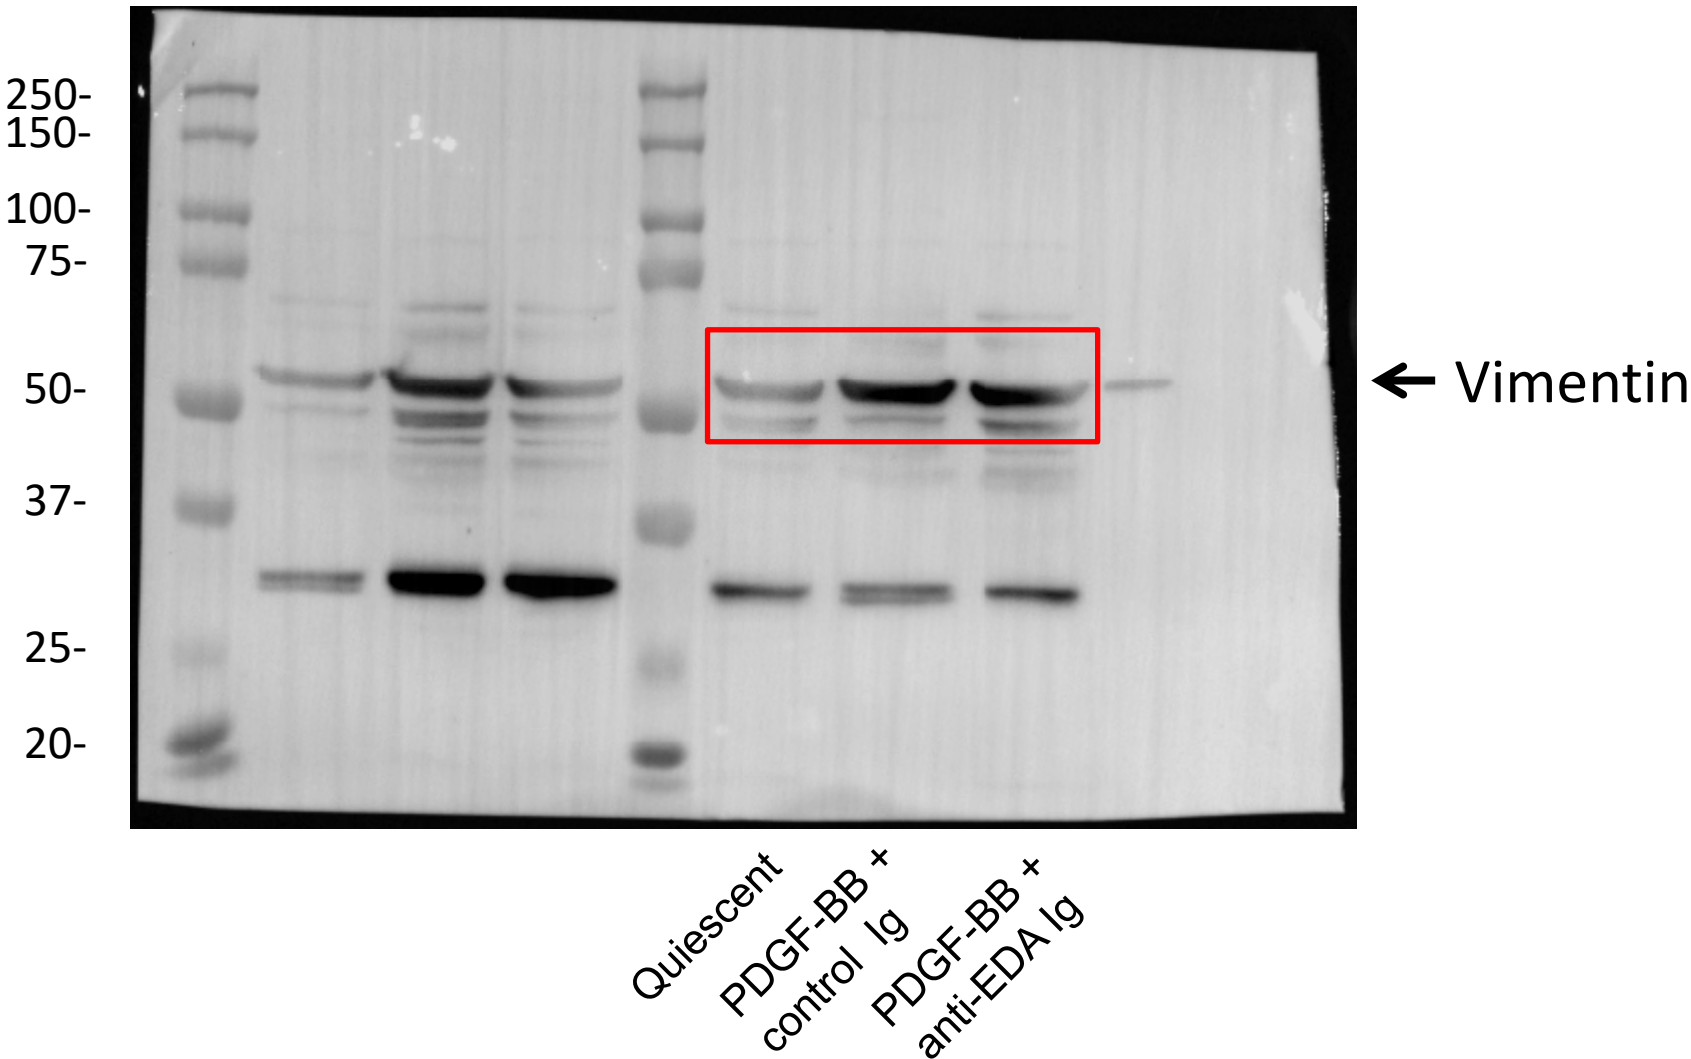

Full unedited gel for Figure 10C-β-actin

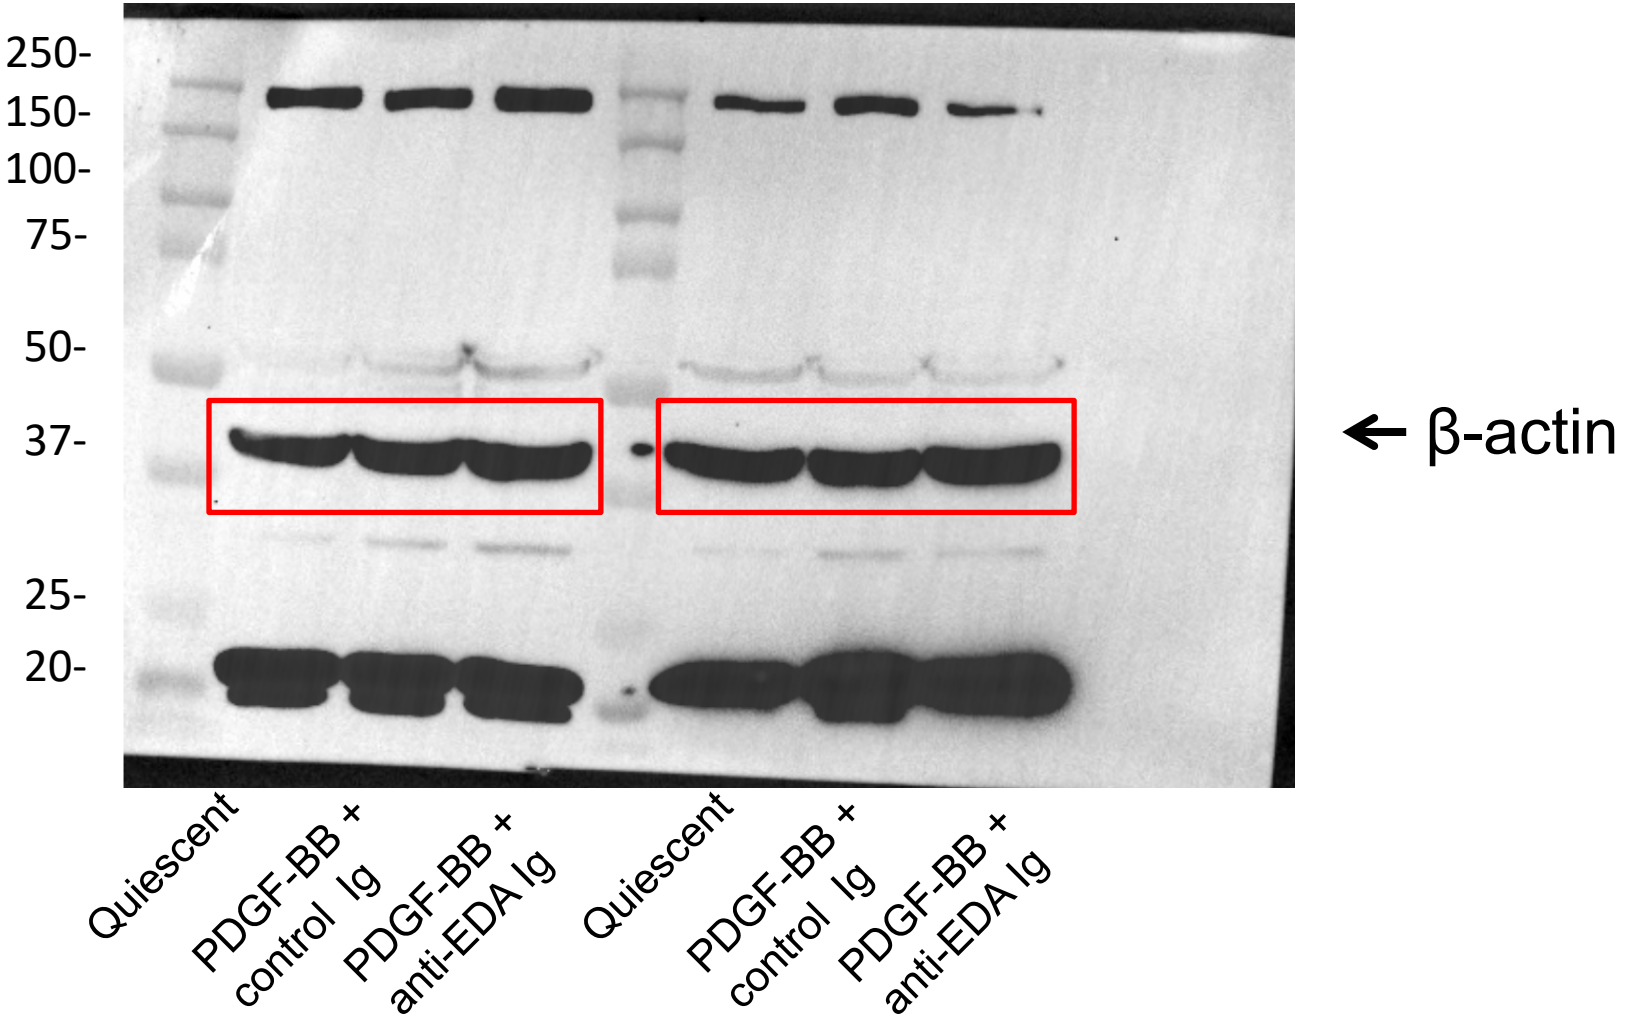

Full unedited gel for Figure 10E-p-AKT1

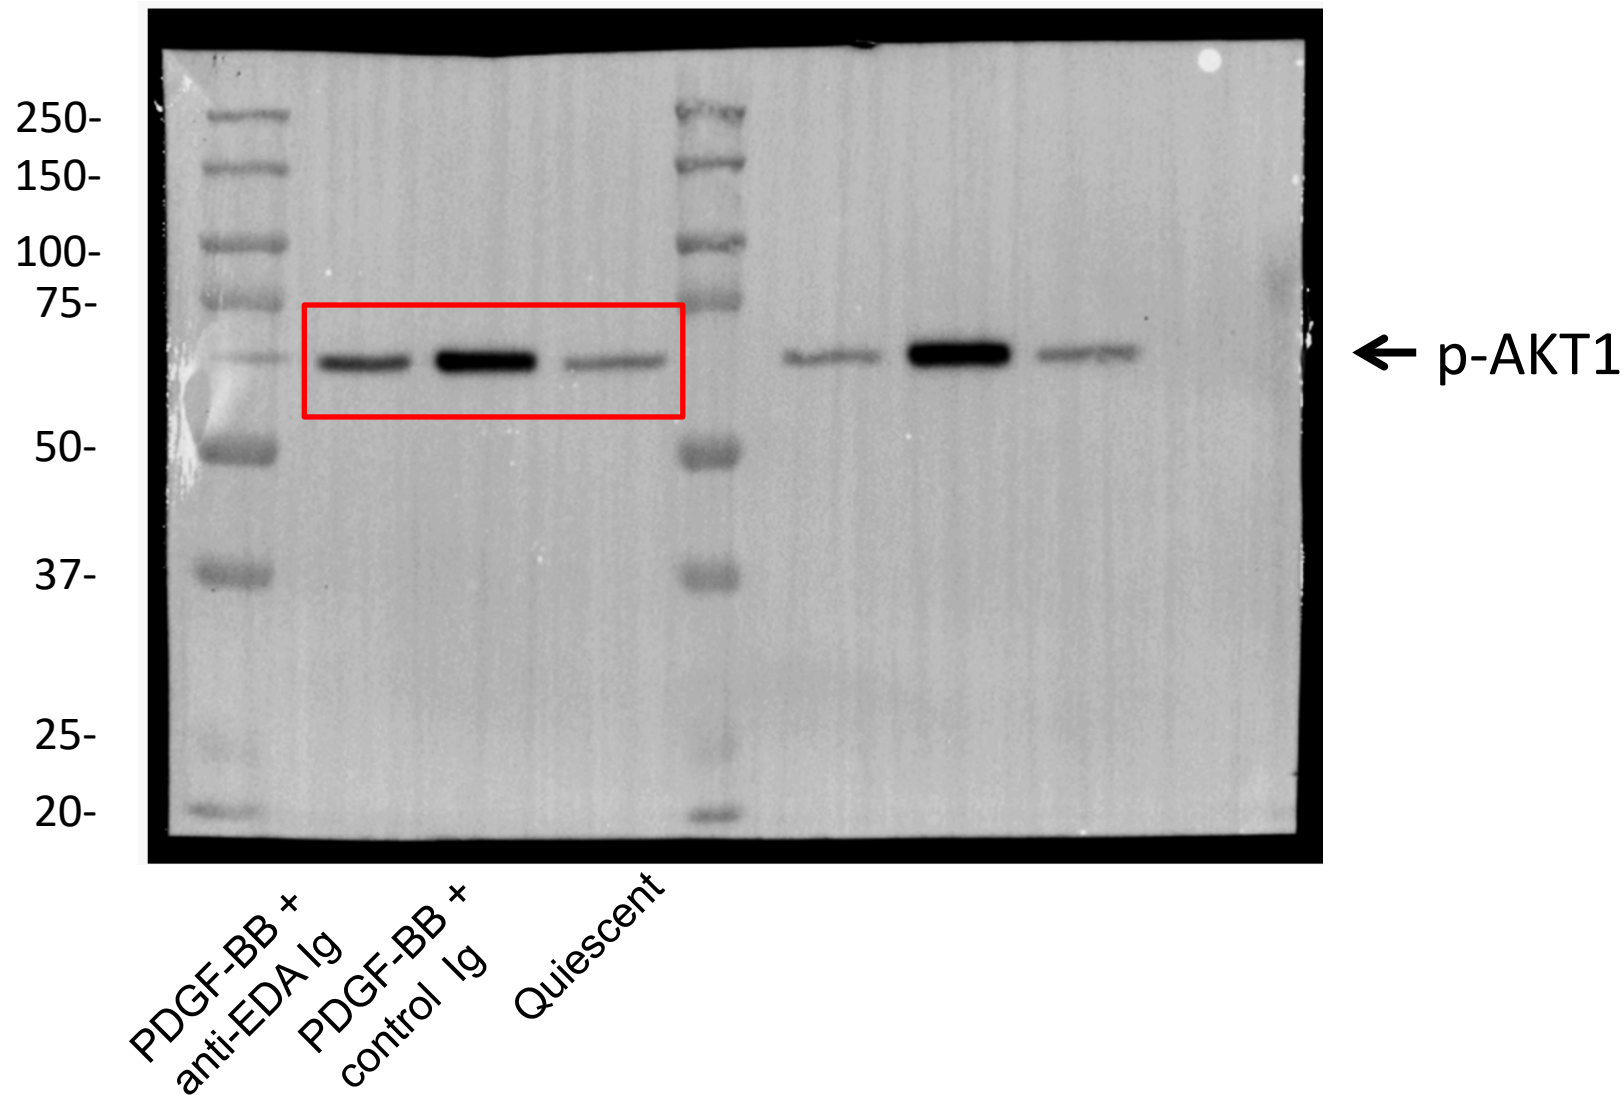

Full unedited gel for Figure 10E-AKT1

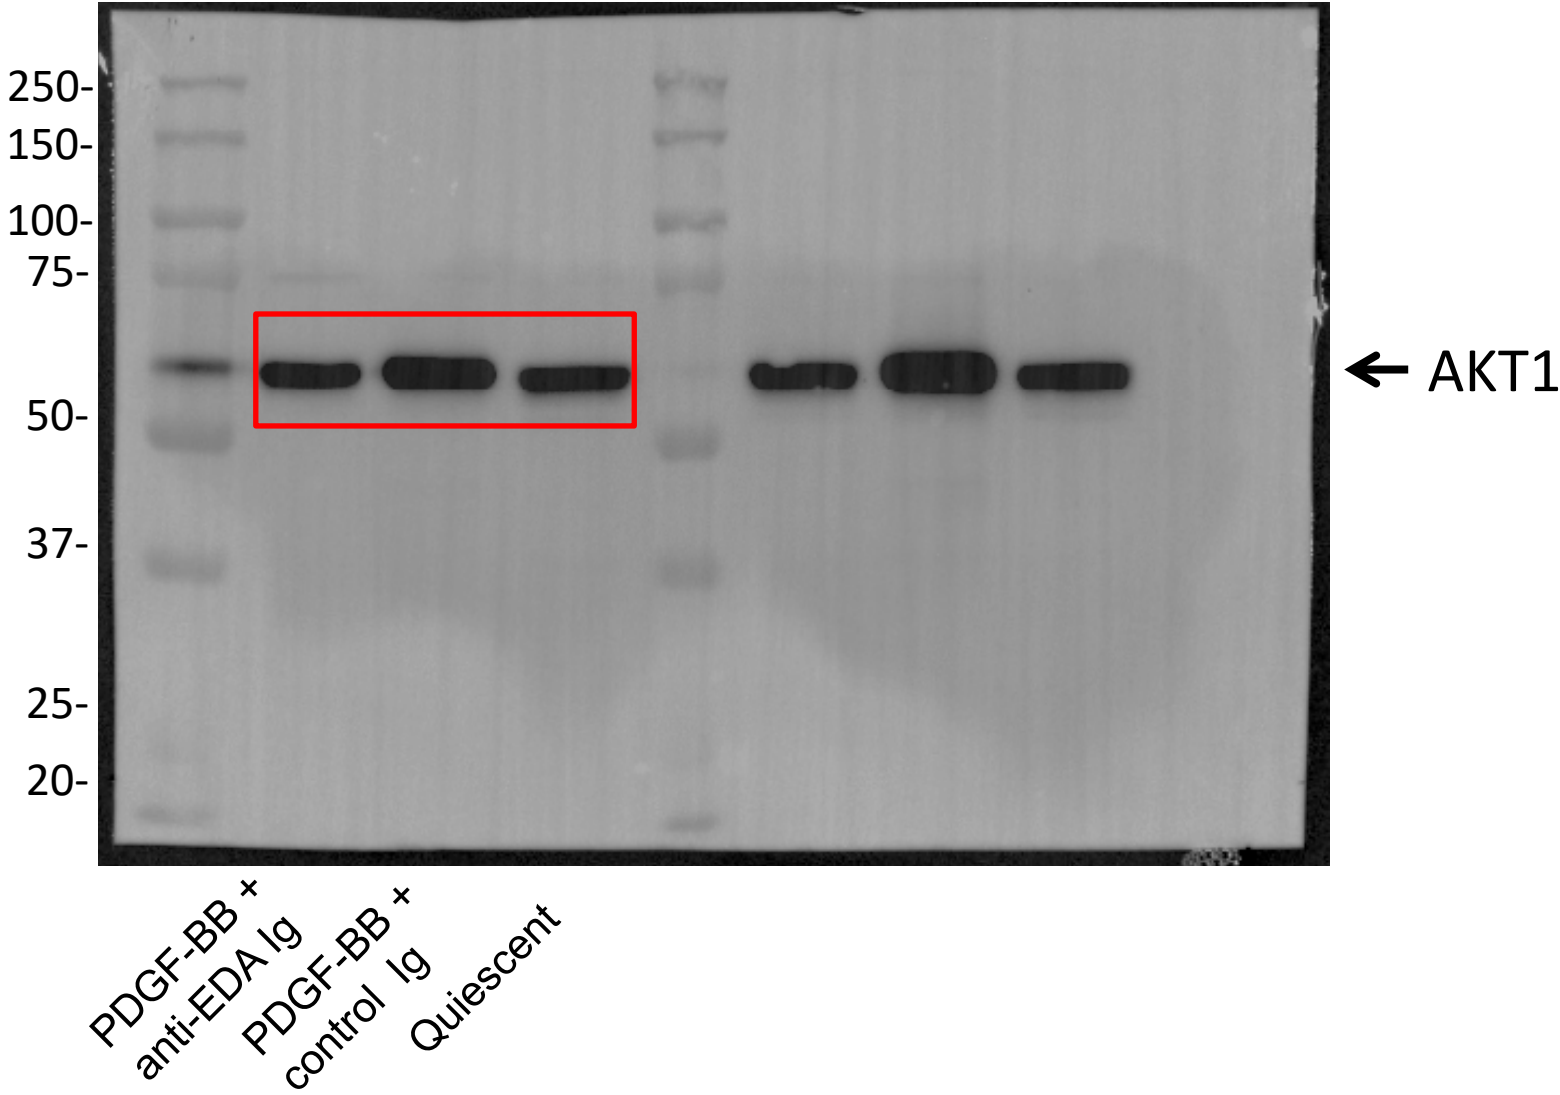

Full unedited gel for Figure 10E-p-mTOR

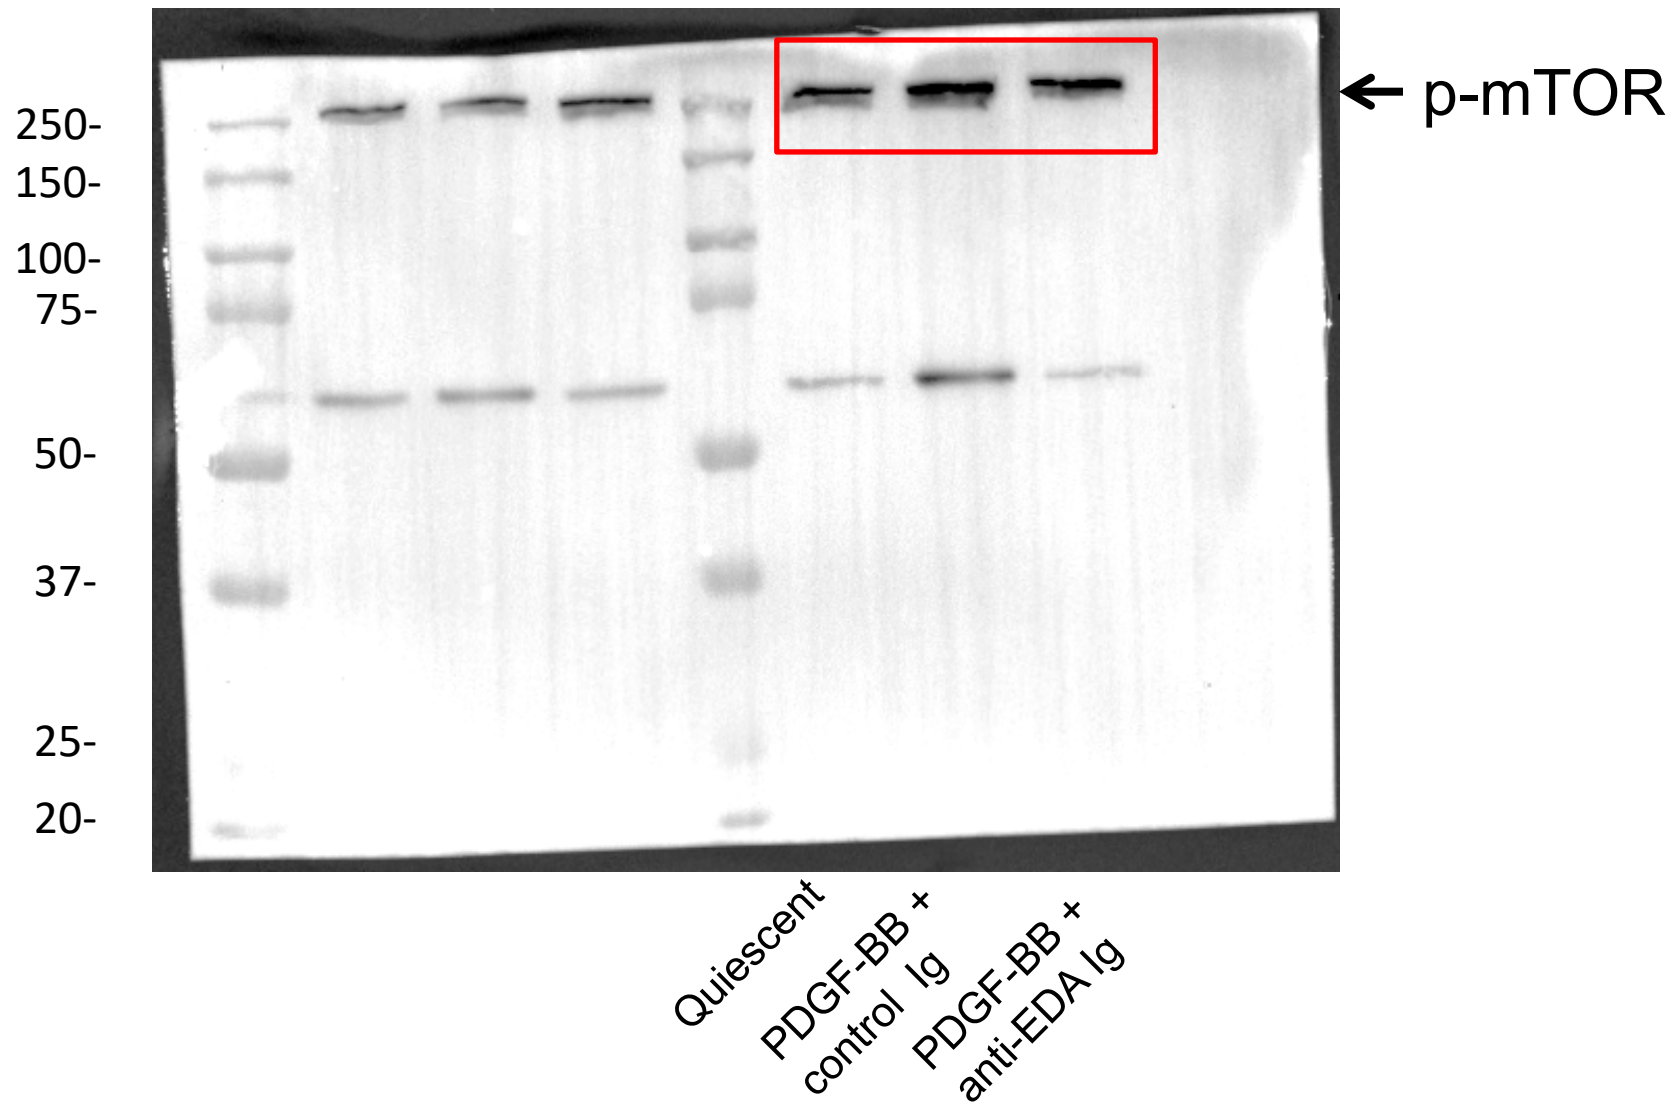



Full unedited gel for Figure 10E-mTOR

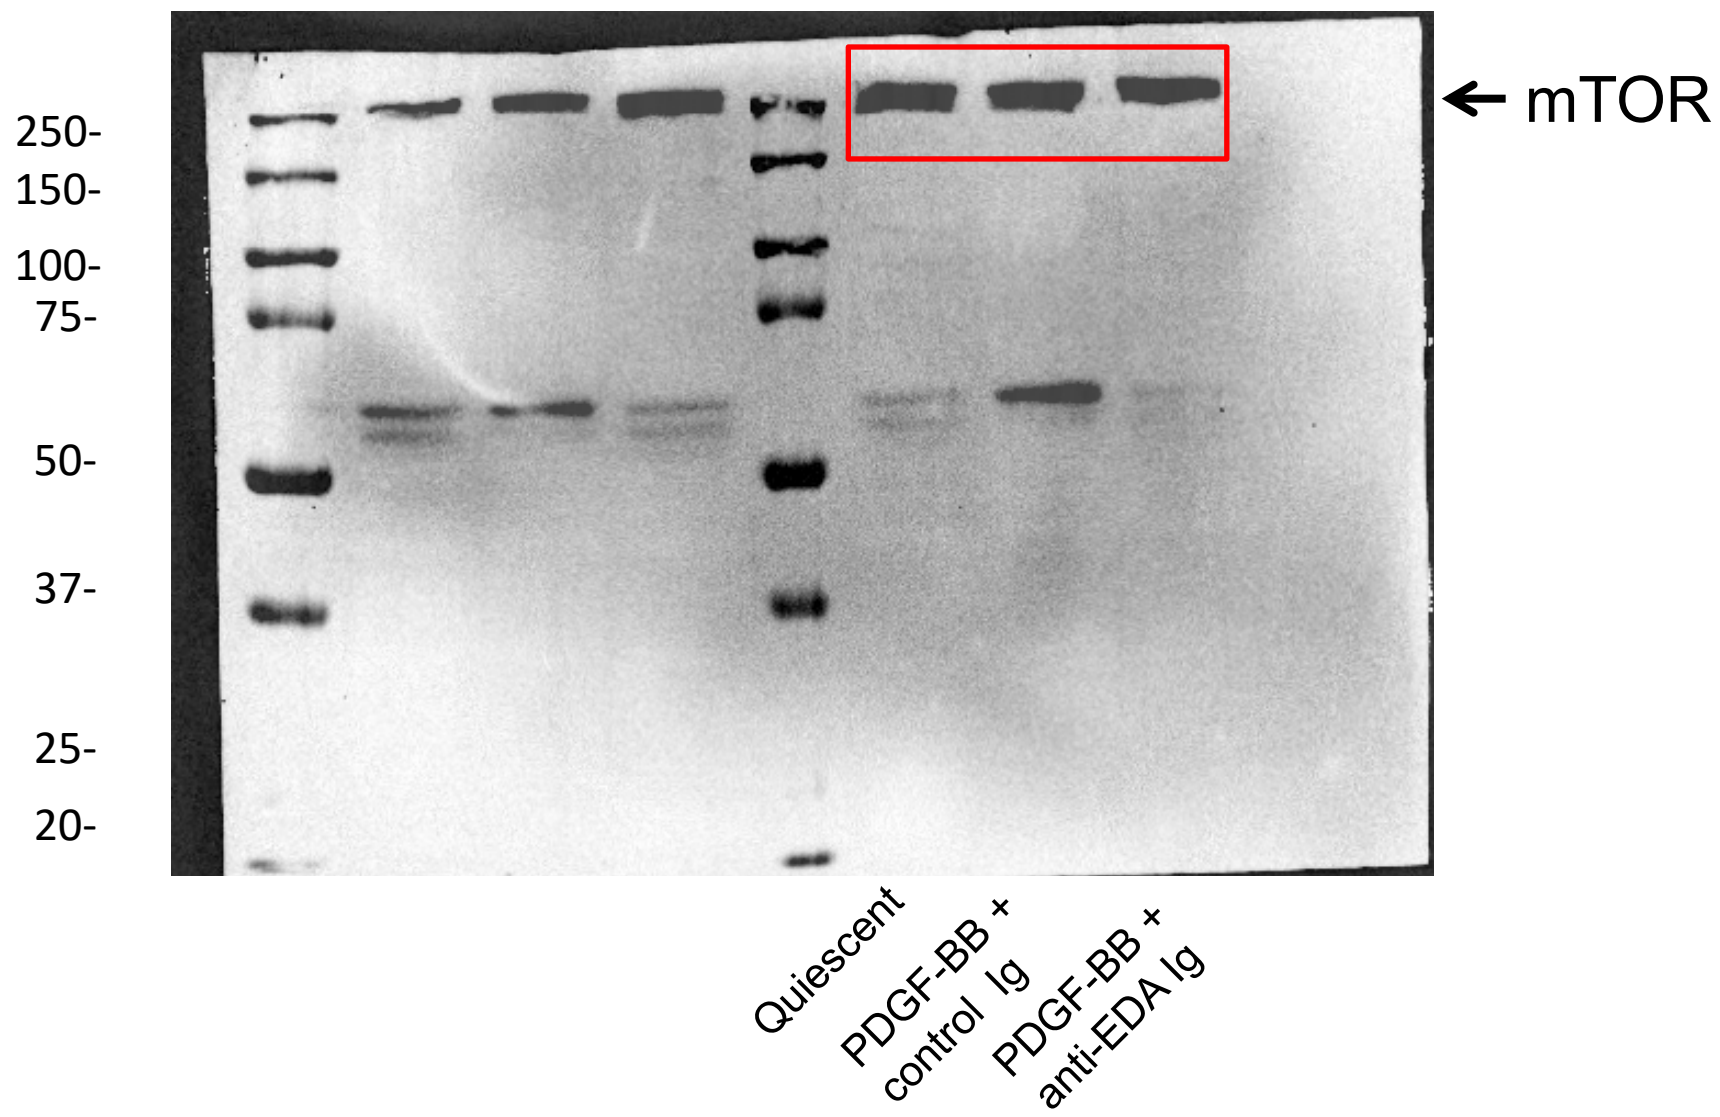



Full unedited gel for Figure 10E-p-NFκB

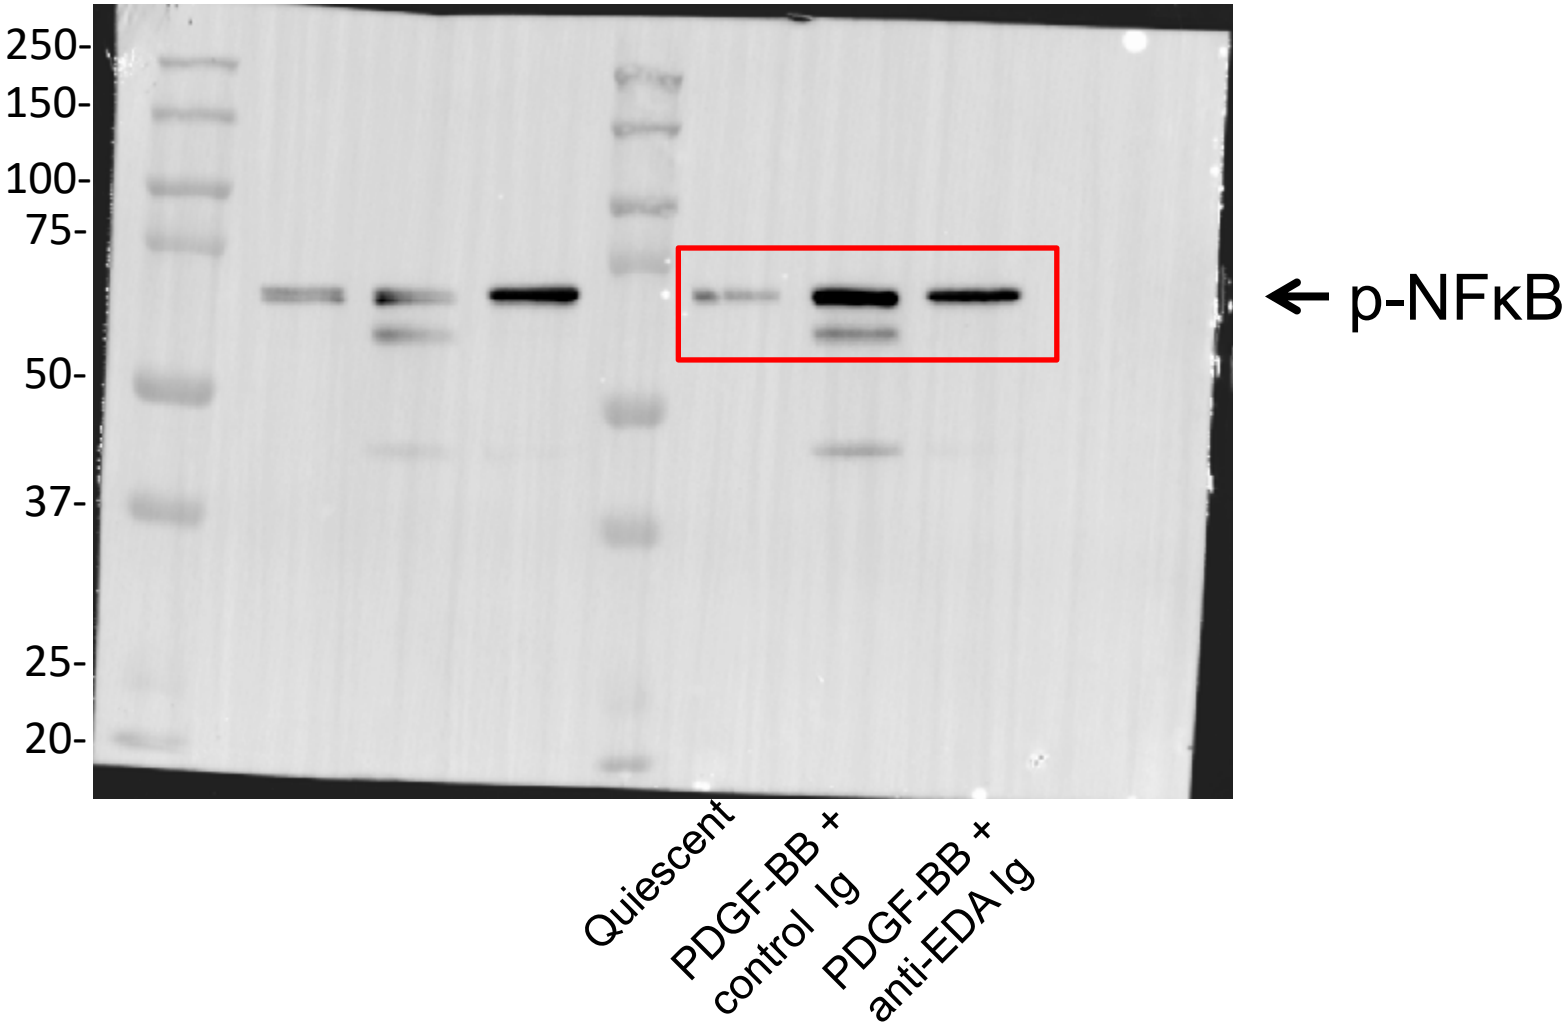

Full unedited gel for Figure 10E-NFκB

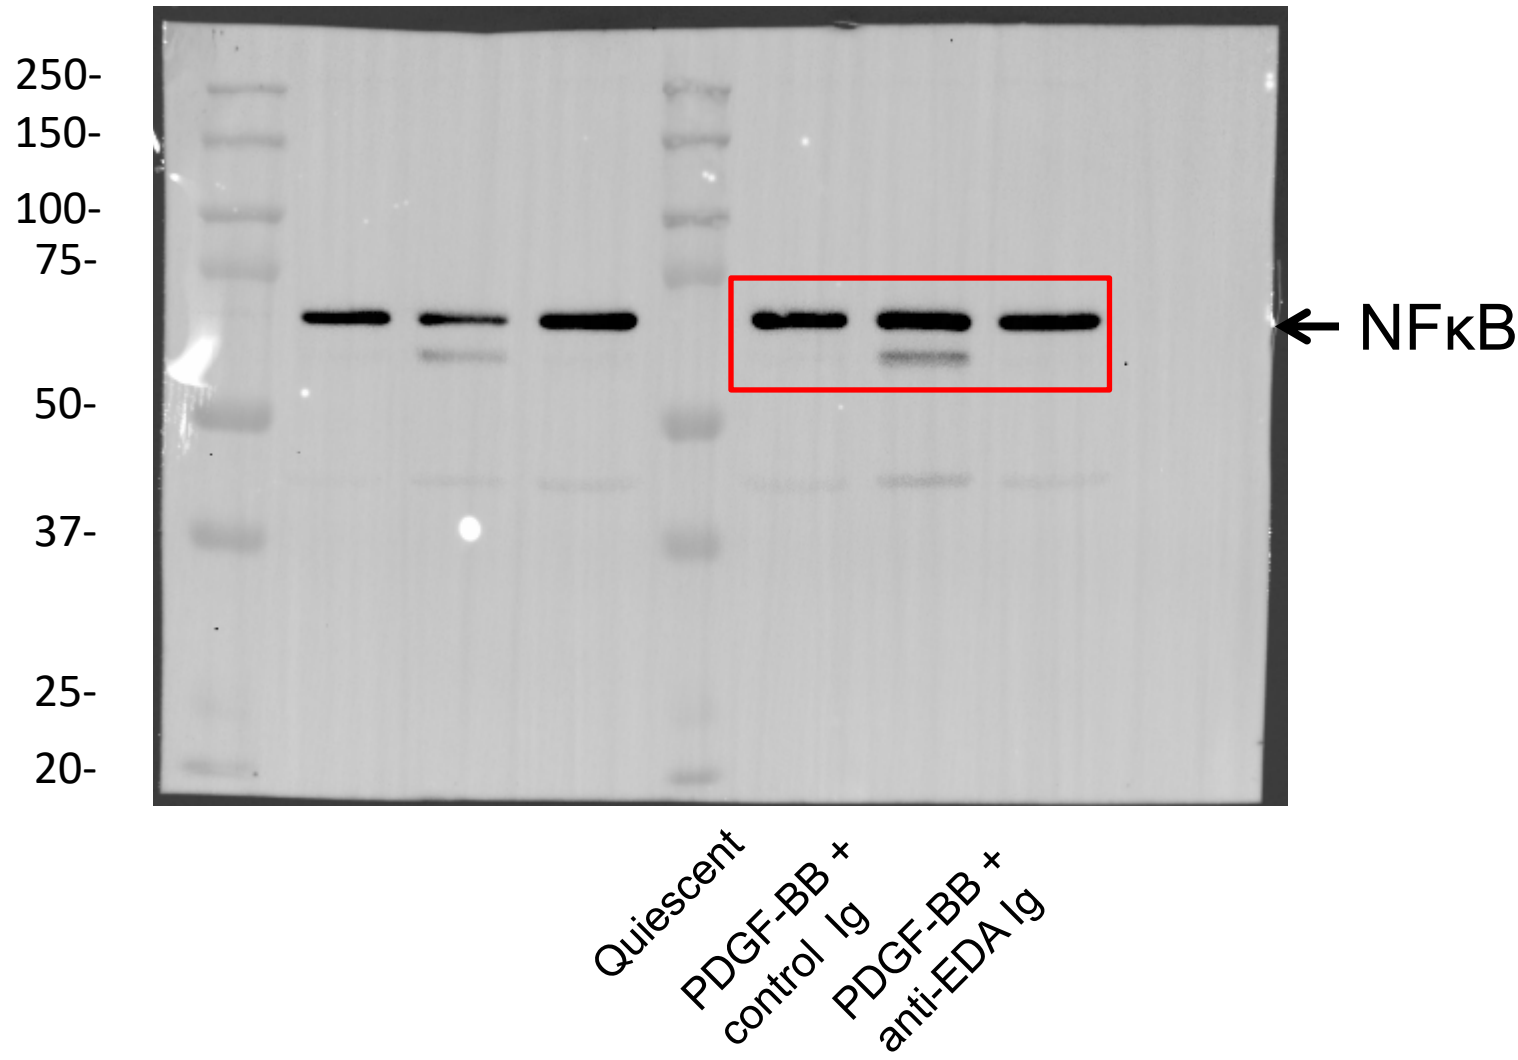

Full unedited gel for Figure 10E-β-actin

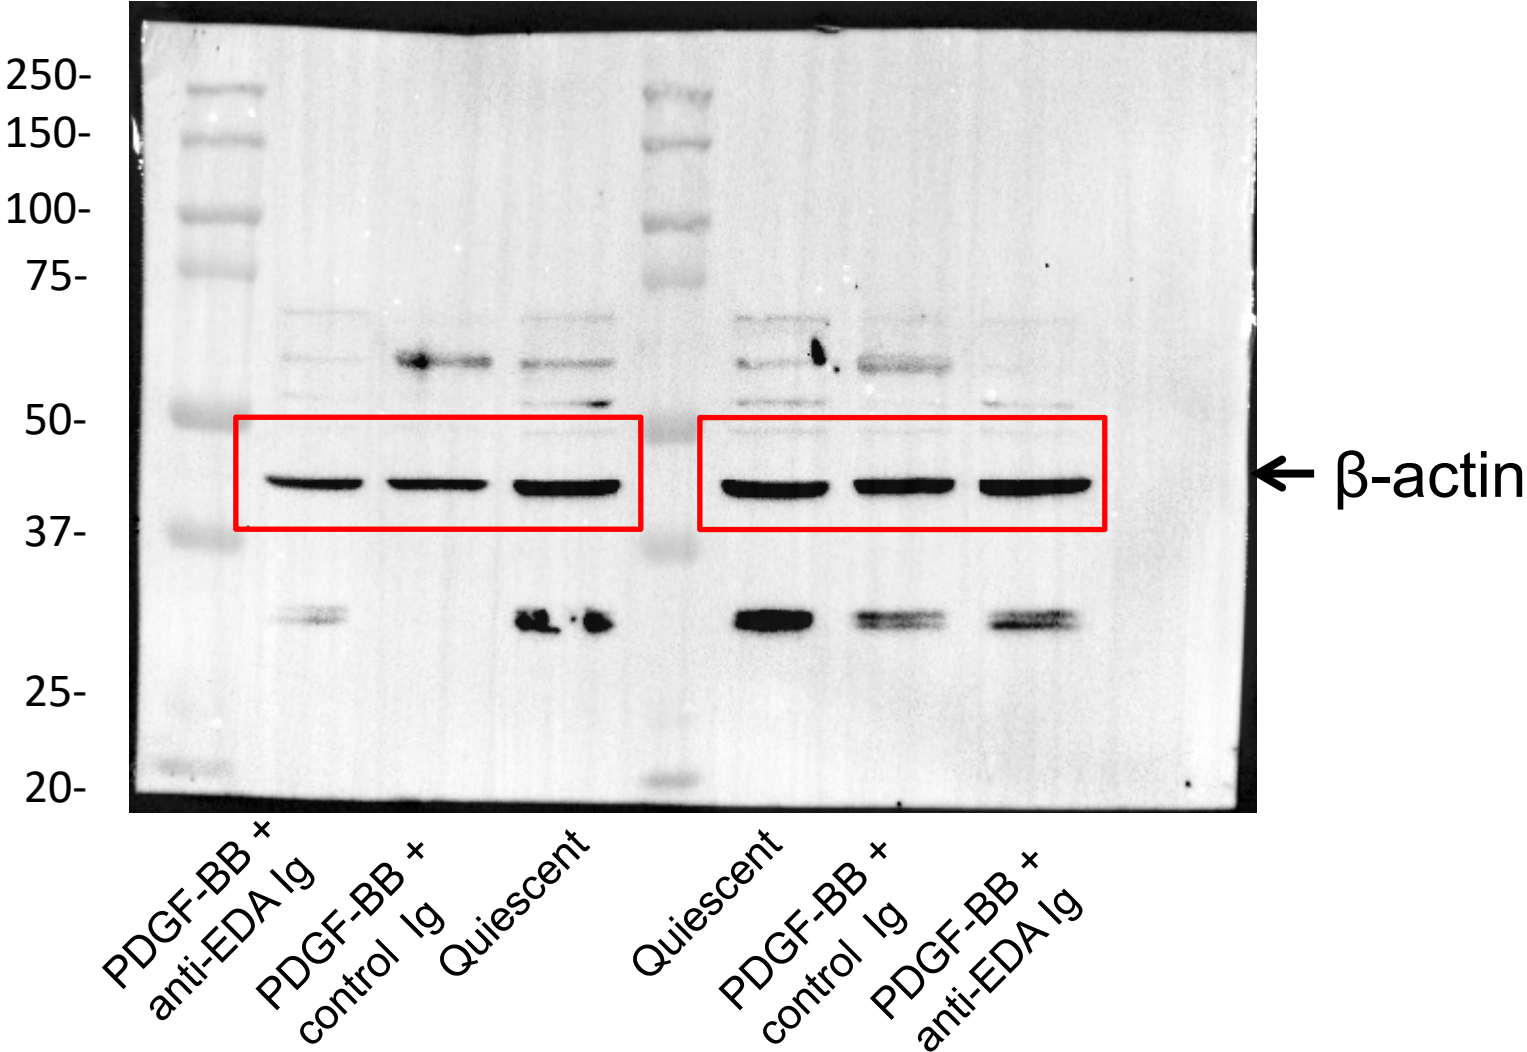

Full unedited gel for Supplemental Figure S5A- Fibronectin

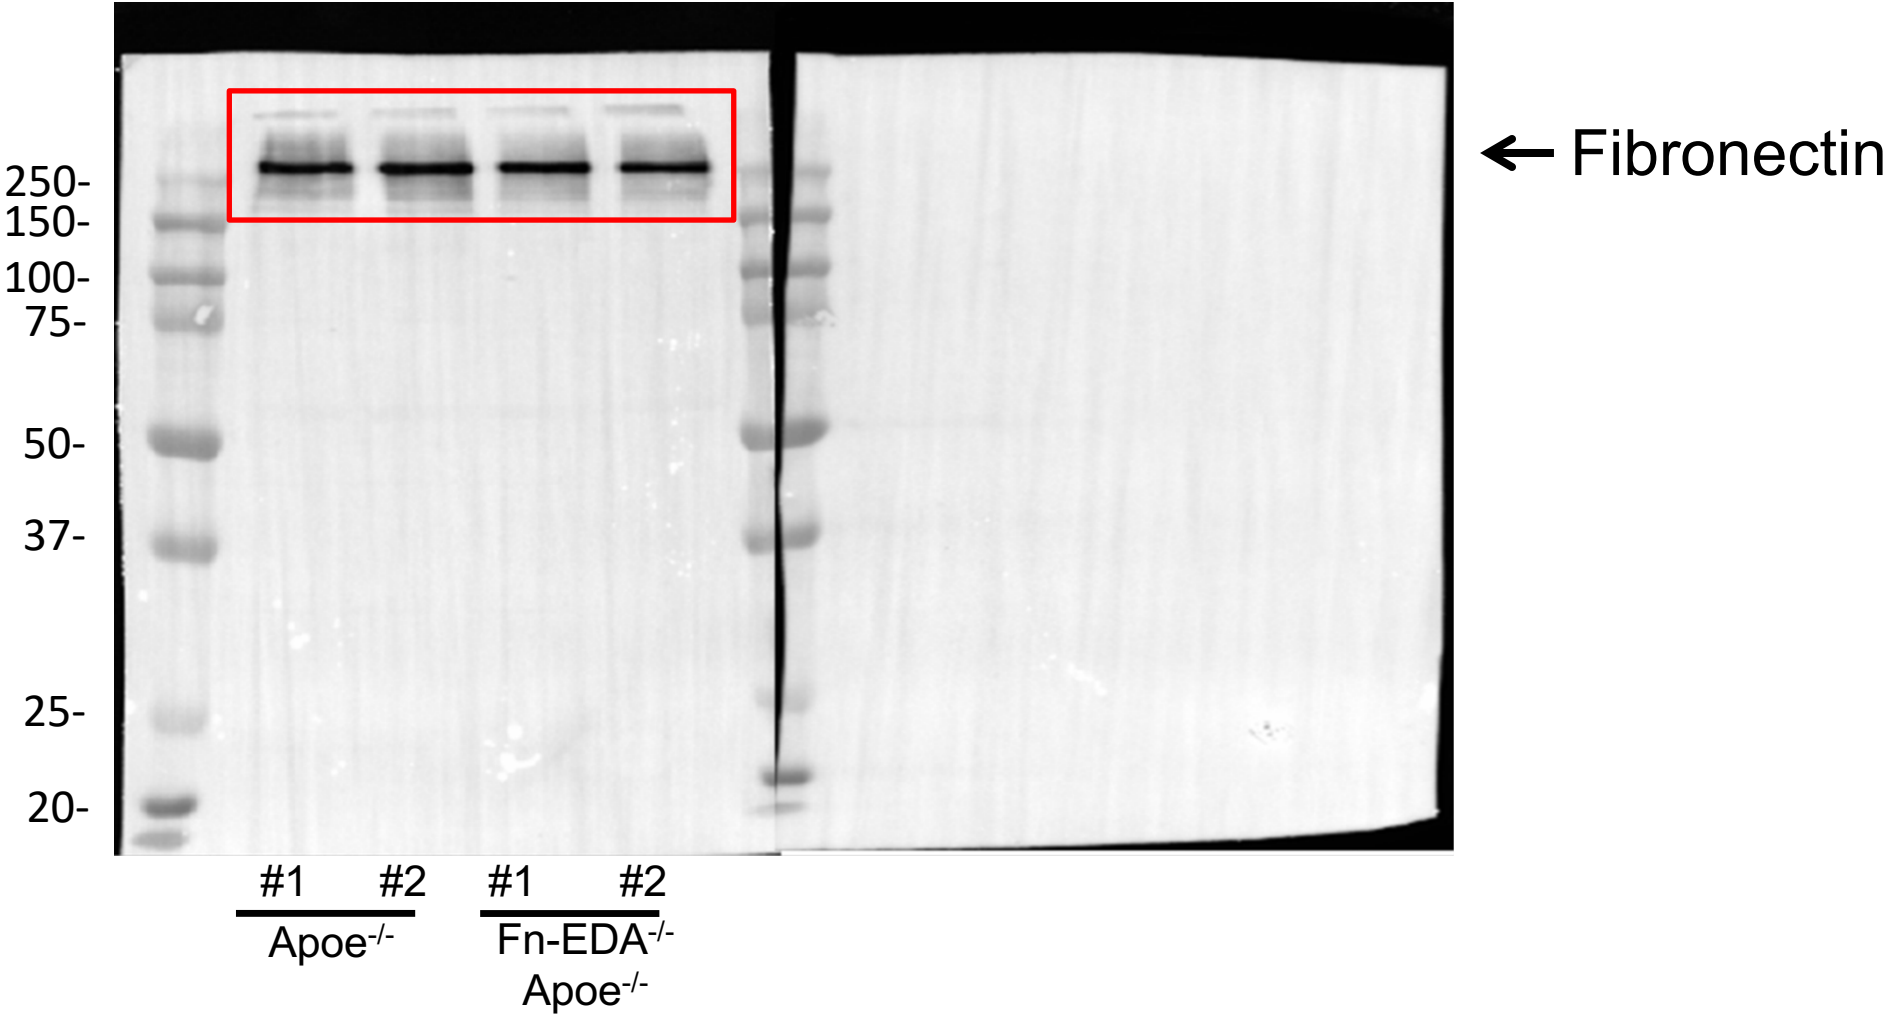

Full unedited gel for Supplemental Figure S5A-β-actin

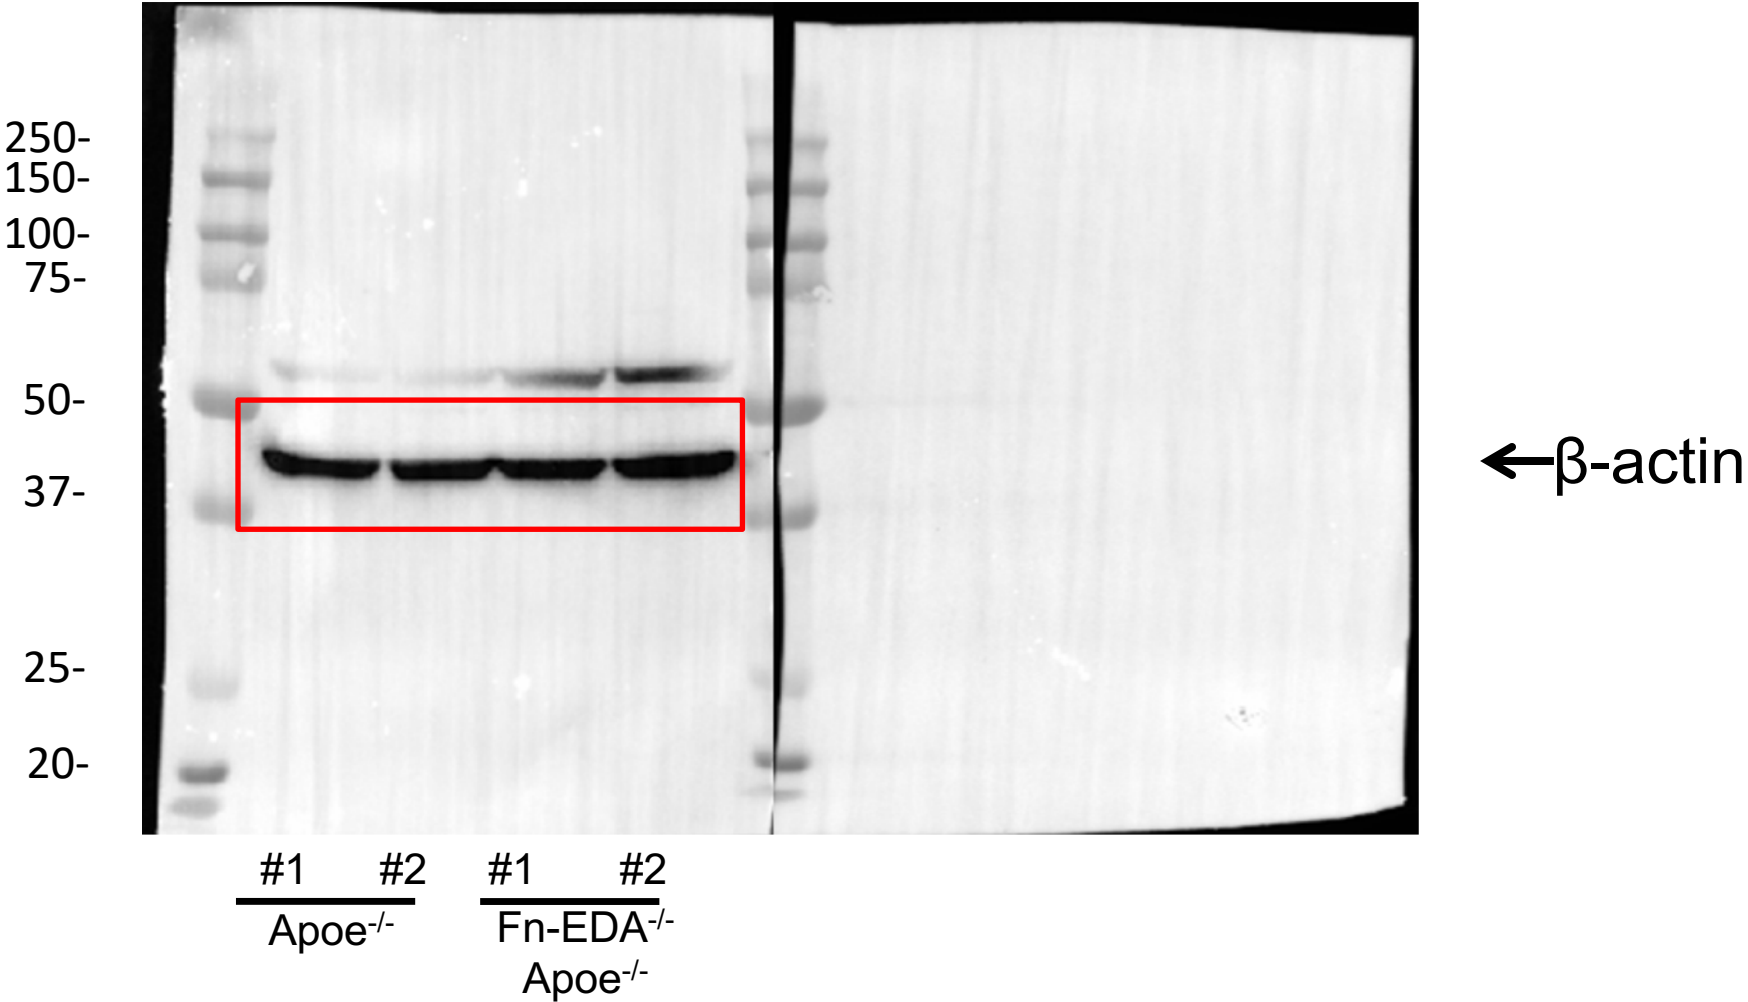

Full unedited gel for Supplemental Figure S7A-SM22α

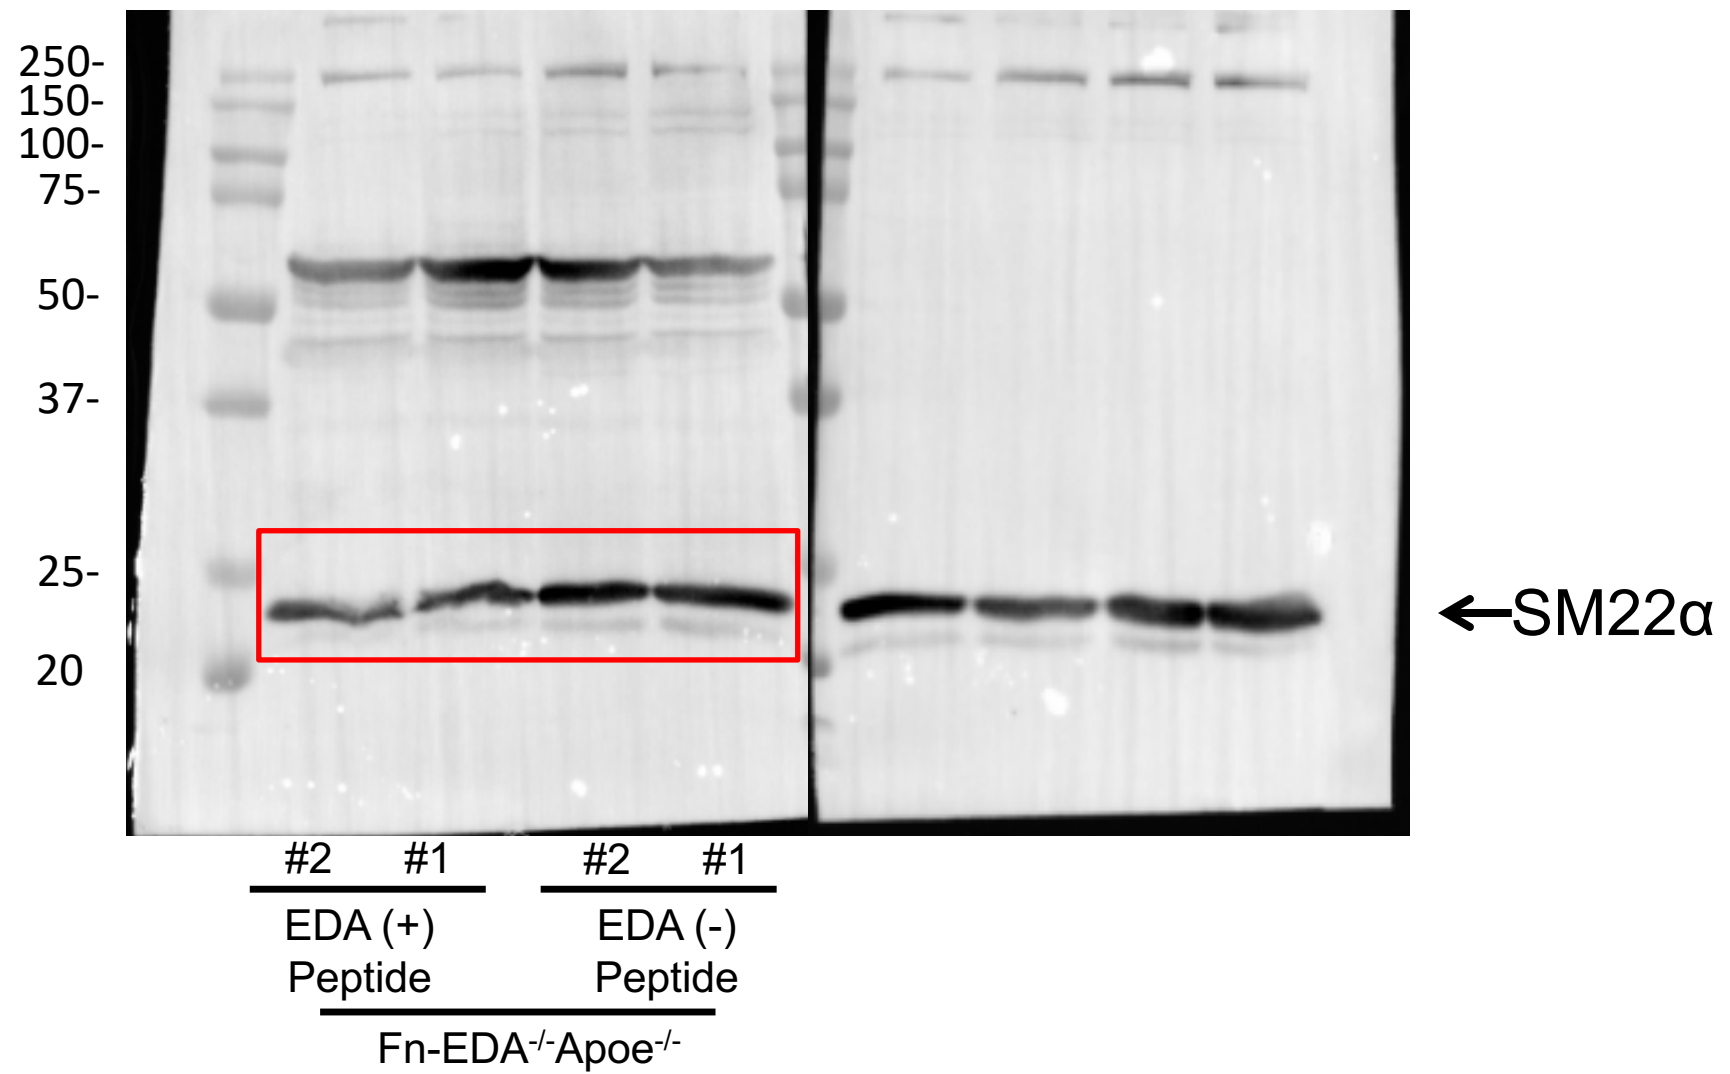

Full unedited gel for Supplemental Figure S7A- SM-MHC

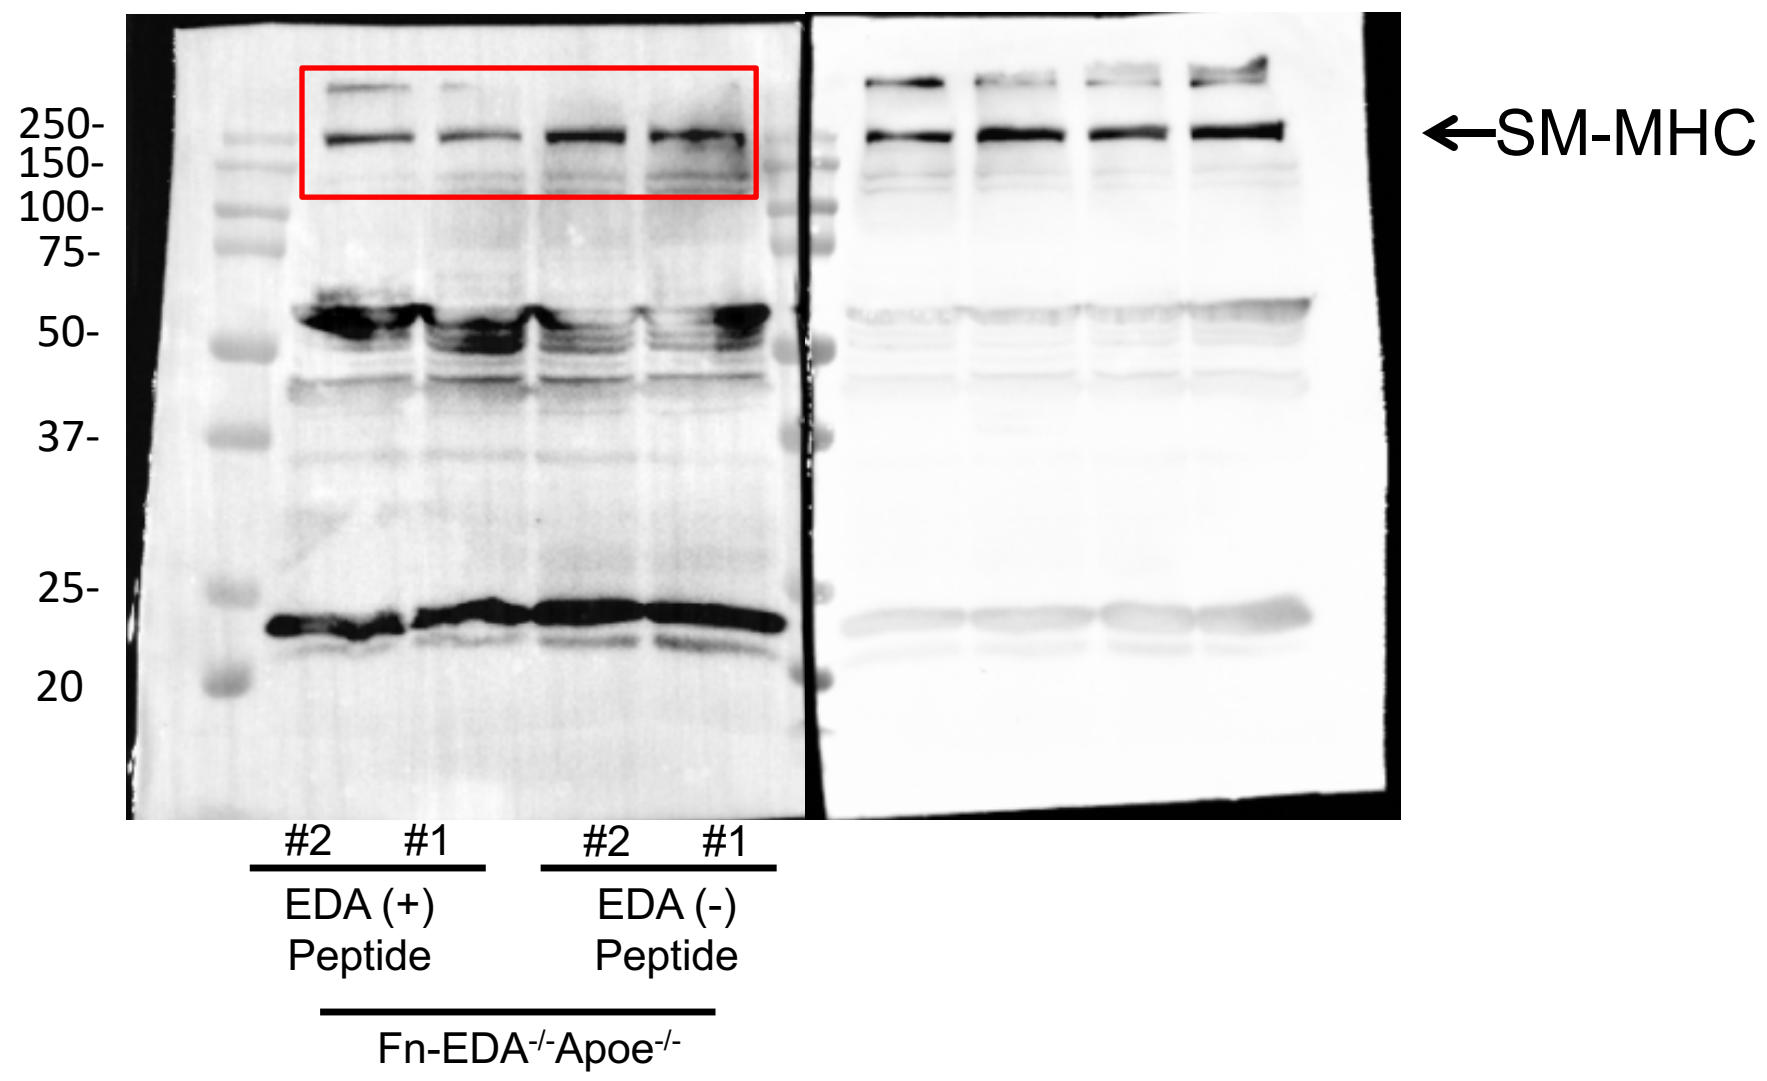

Full unedited gel for Supplemental Figure S7A- Vimentin

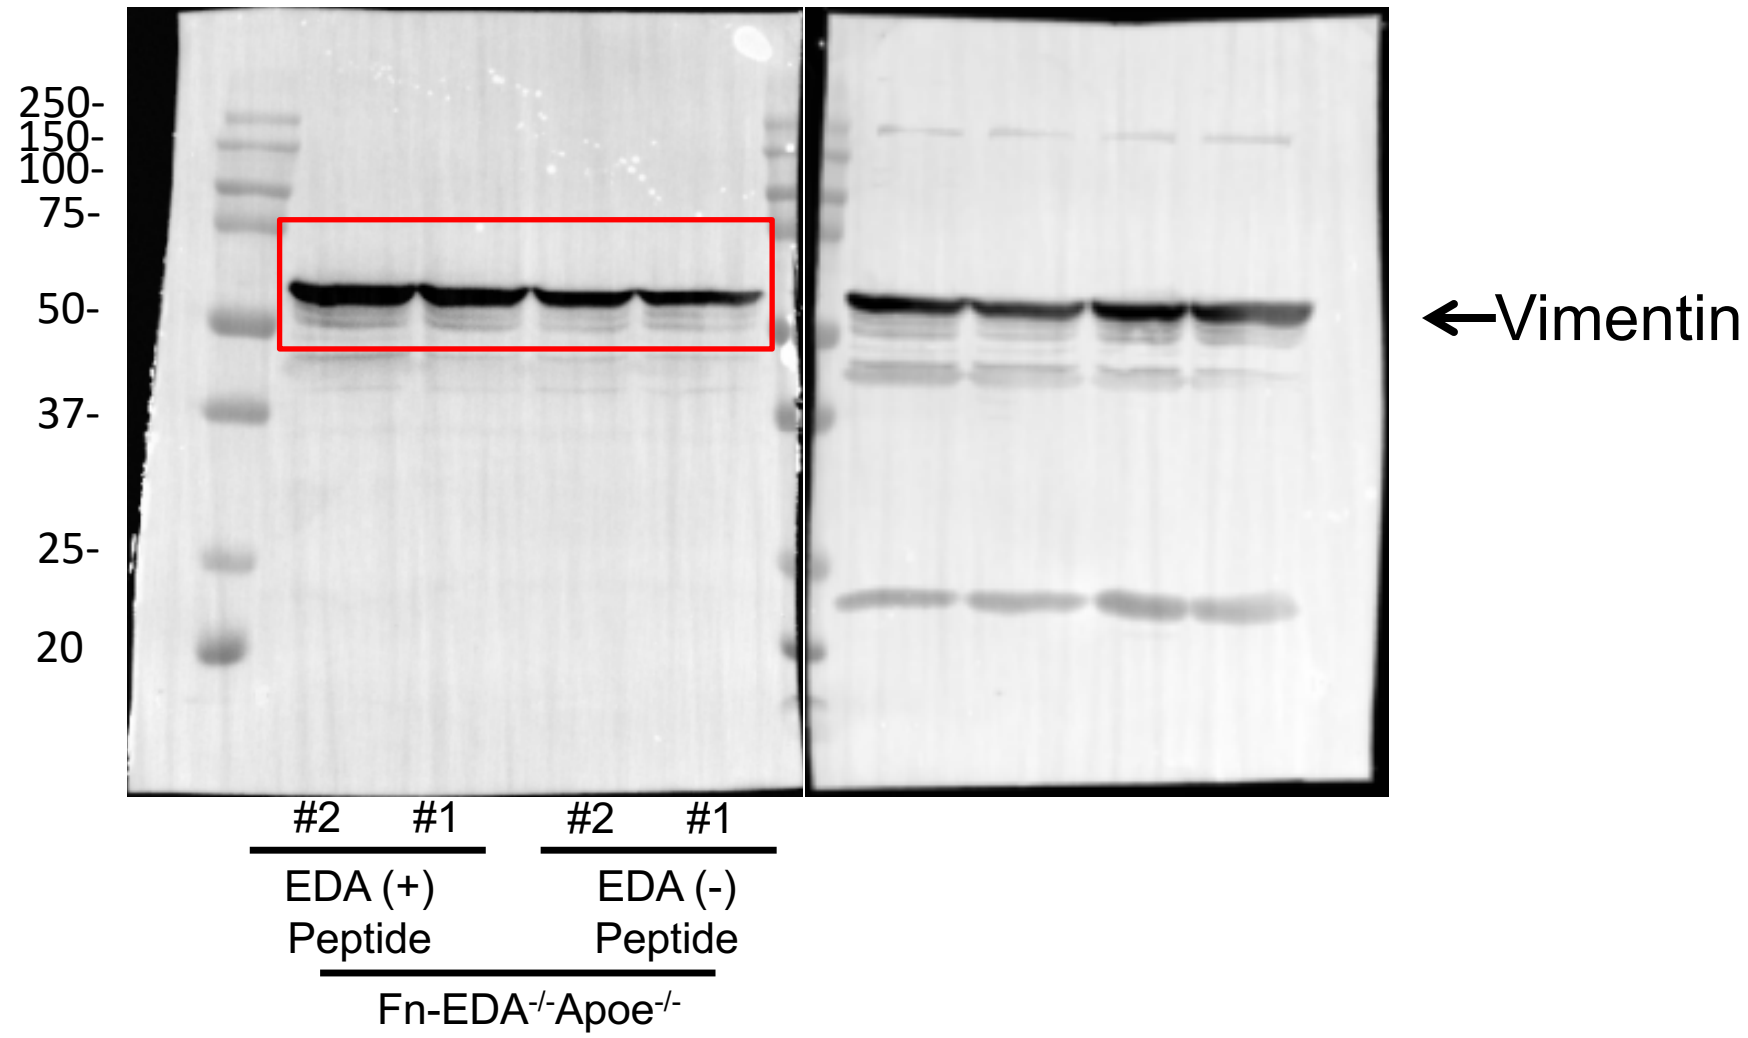



Full unedited gel for Supplemental Figure S7A- Osteopontin

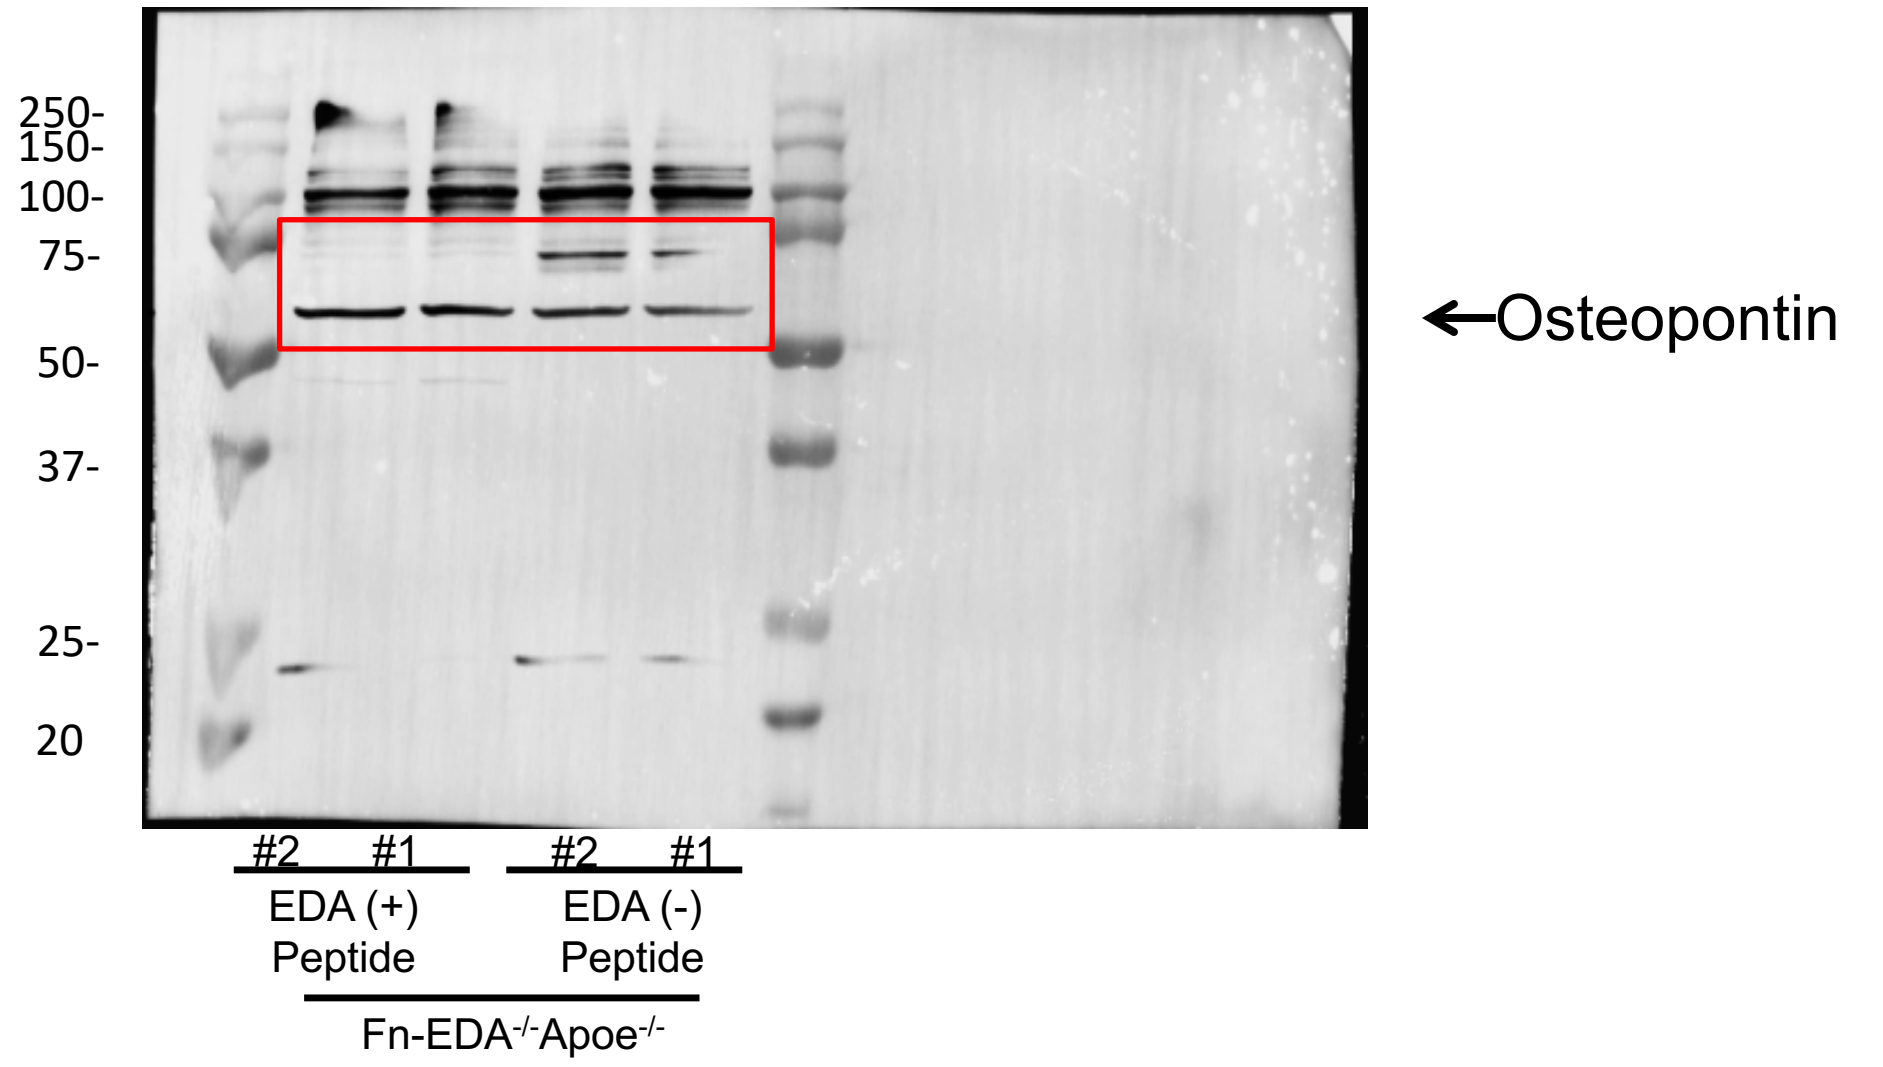

Full unedited gel for Supplemental Figure S7A-β-actin

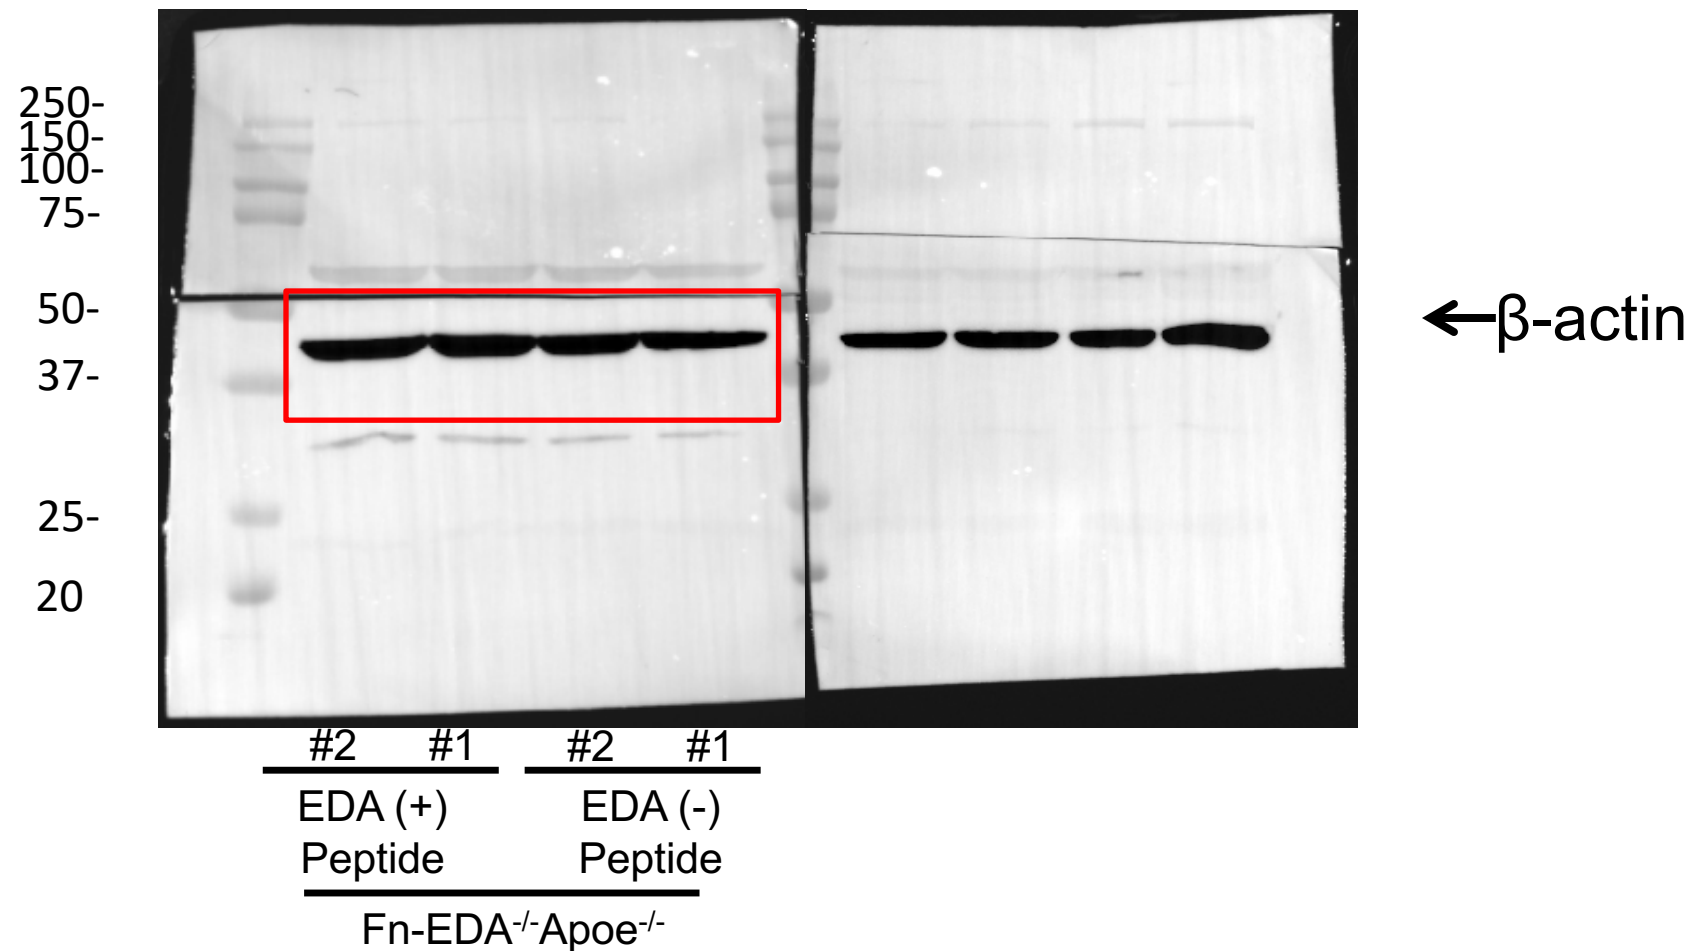

Full unedited gel for Supplemental Figure S8A- p-FAK

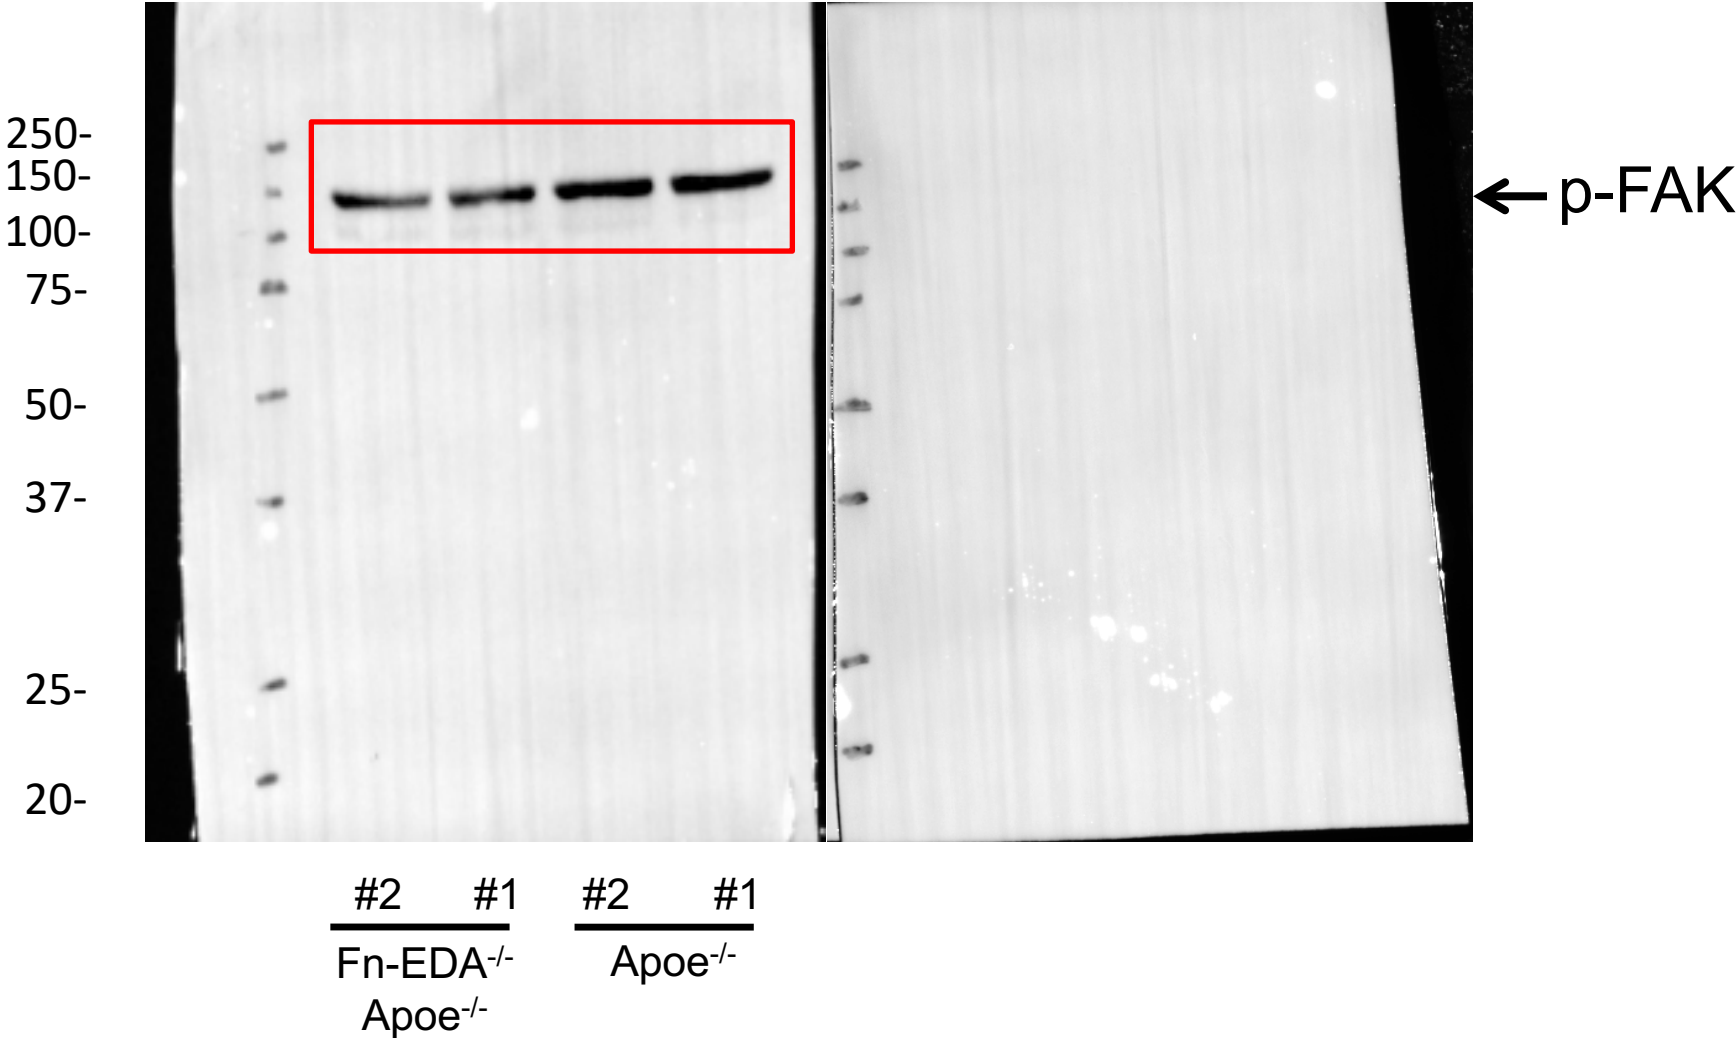

Full unedited gel for Supplemental Figure S8A- FAK

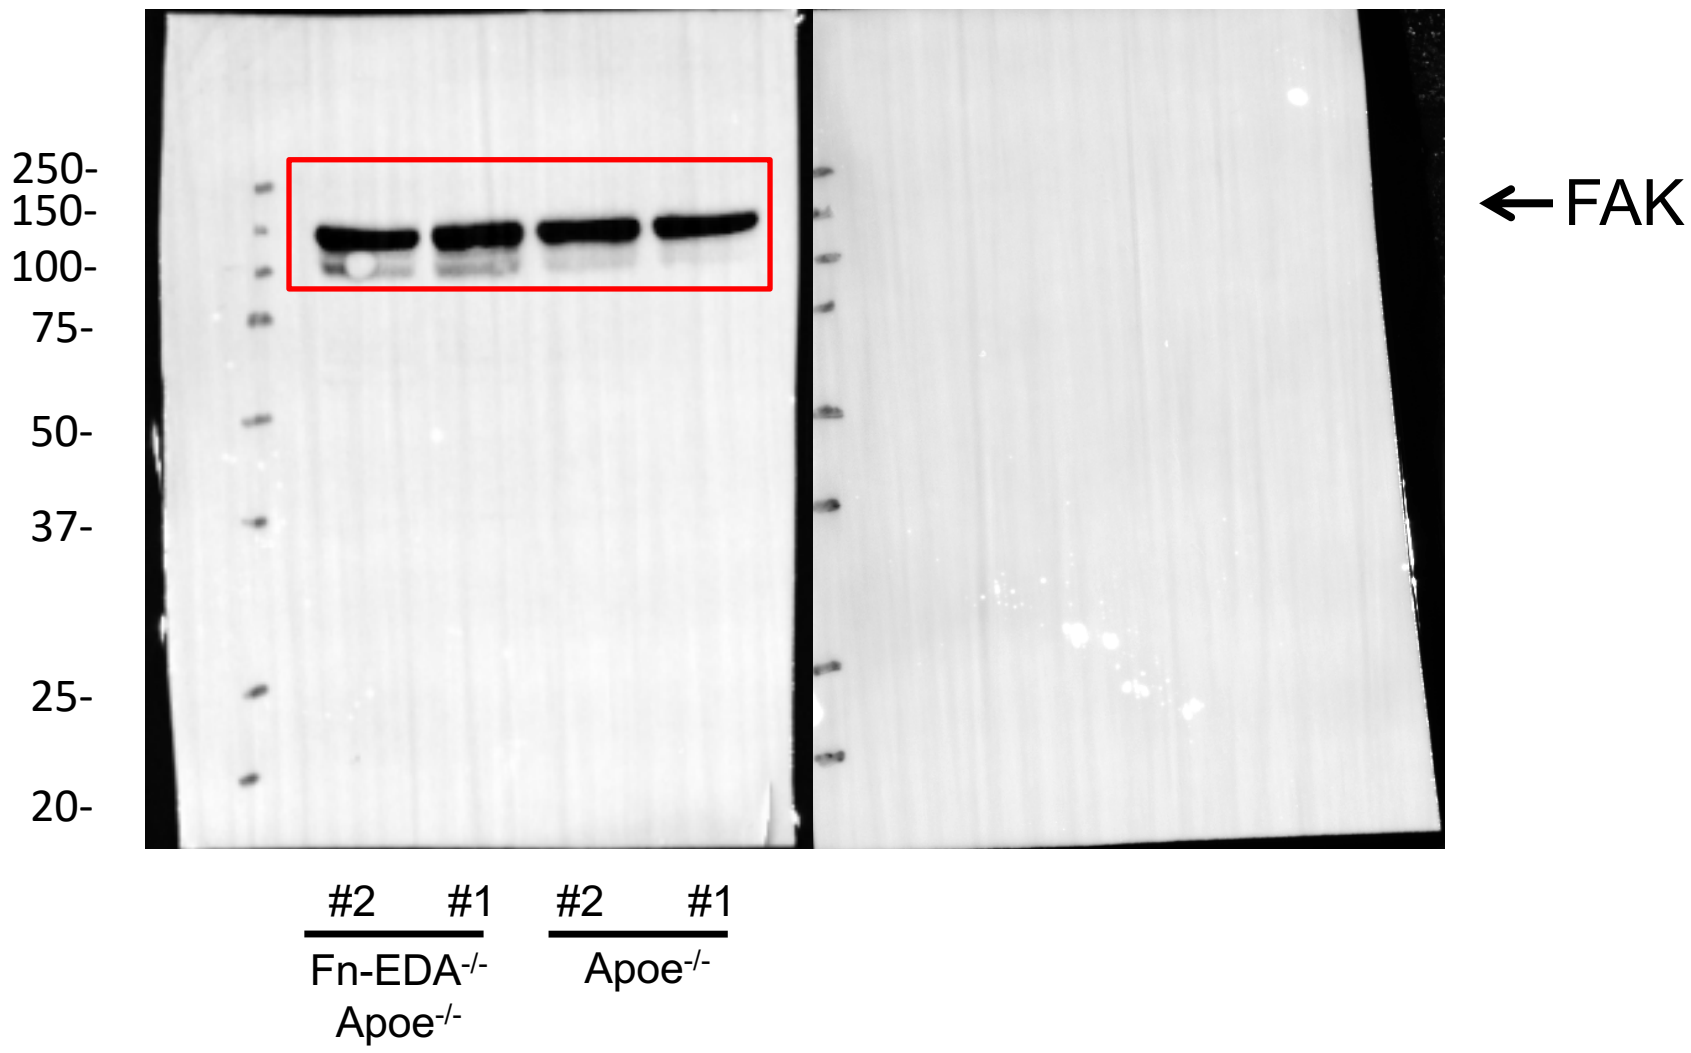

Full unedited gel for Supplemental Figure S8A-p-SRC

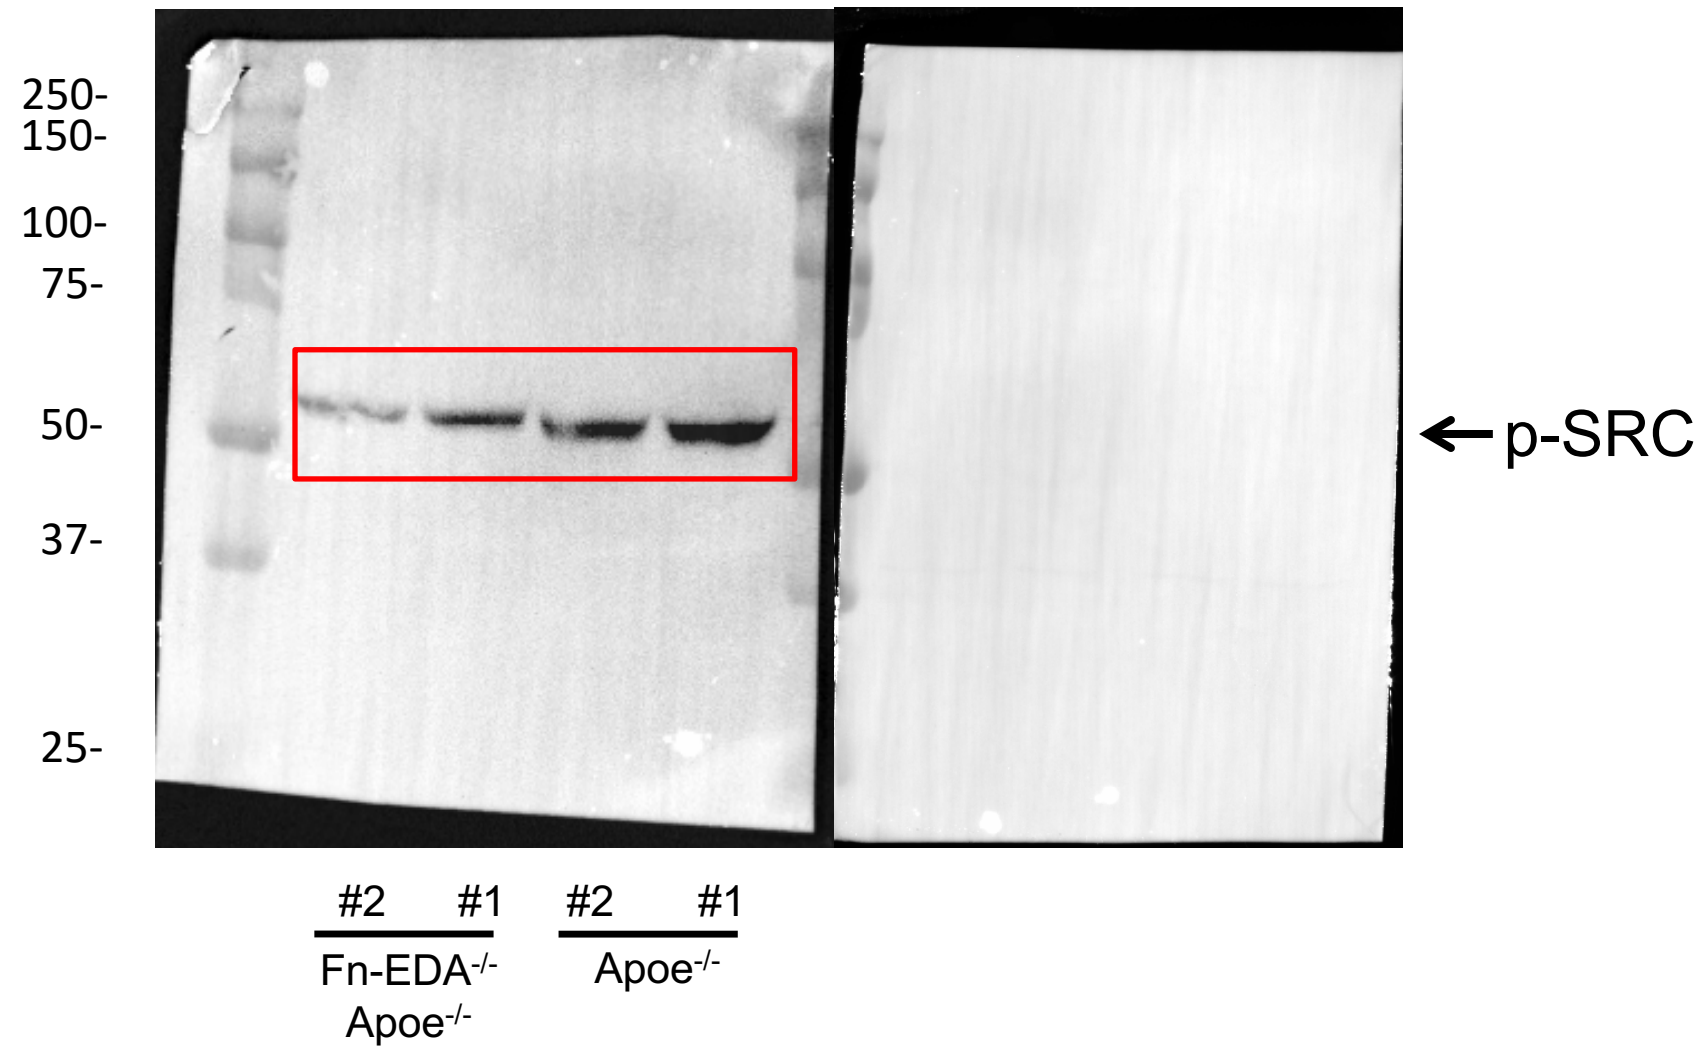

Full unedited gel for Supplemental Figure S8A-SRC

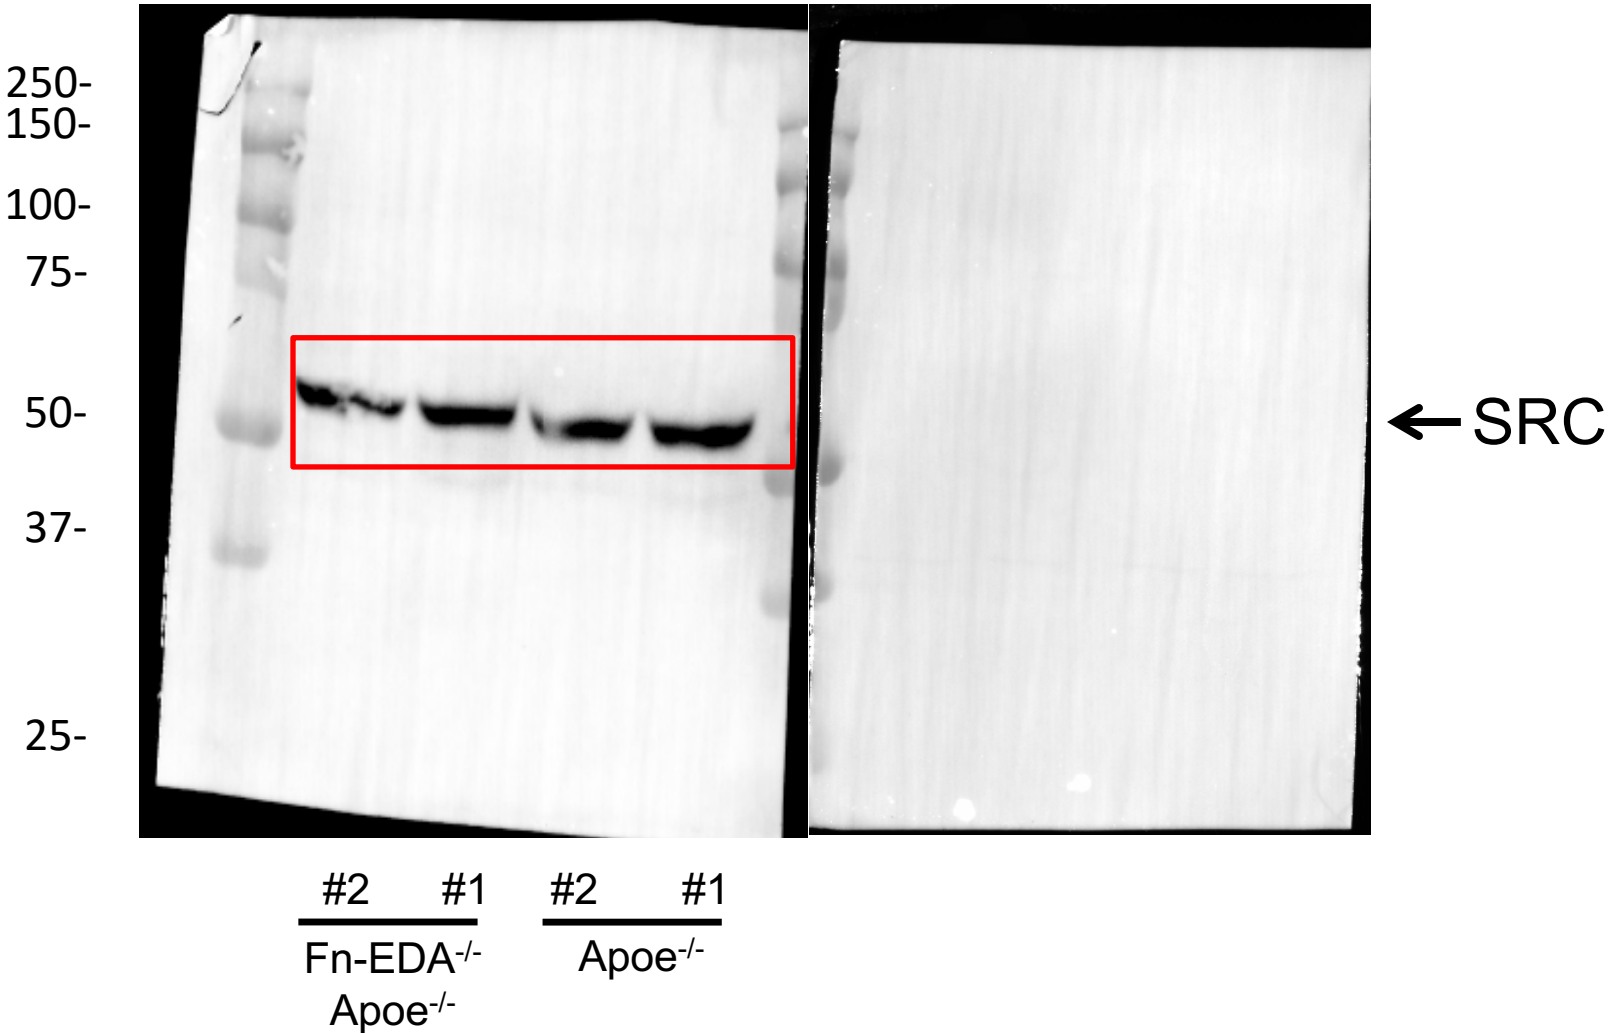

Full unedited gel for Supplemental Figure S8A-β-actin

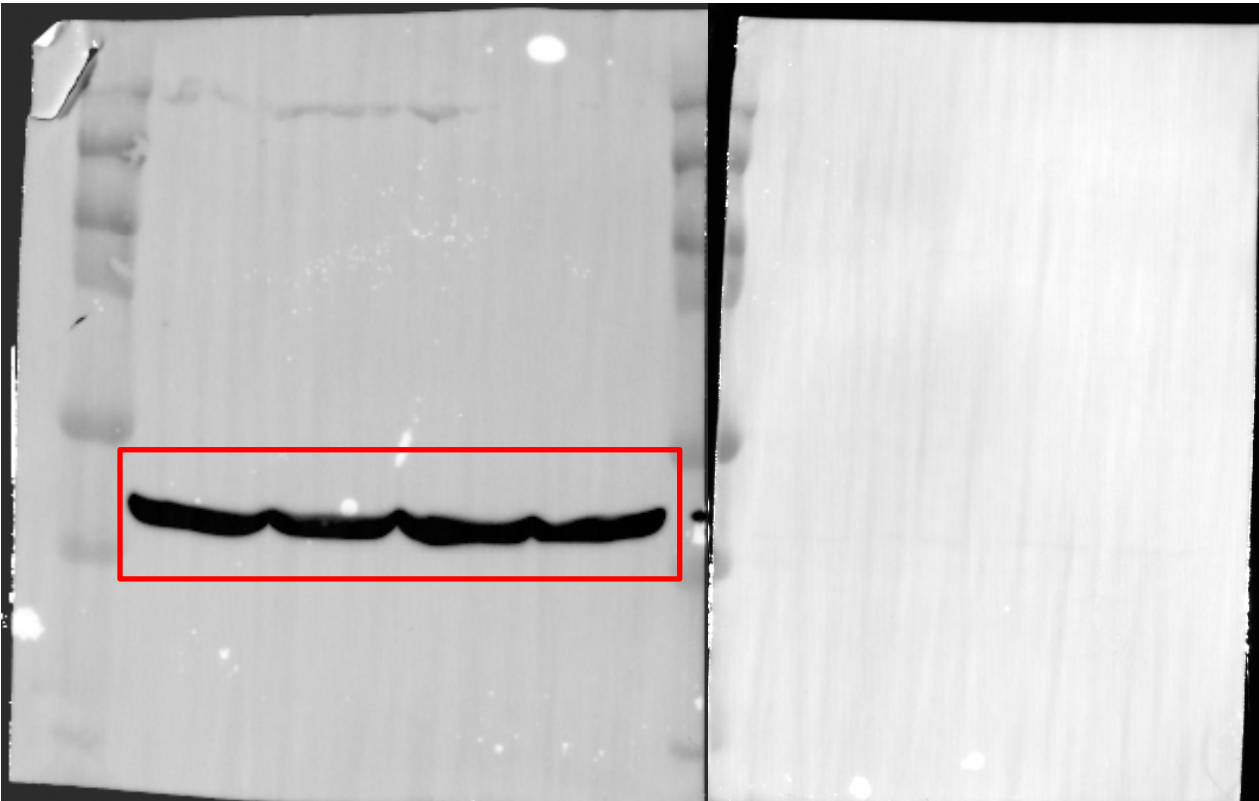

← β-actin

|                       |           |                     |           |
|-----------------------|-----------|---------------------|-----------|
| <u>#2</u>             | <u>#1</u> | <u>#2</u>           | <u>#1</u> |
| Fn-EDA <sup>-/-</sup> |           | Apoe <sup>-/-</sup> |           |
| Apoe <sup>-/-</sup>   |           |                     |           |

Full unedited gel for Supplemental Figure S9A-p-ERK 1/2

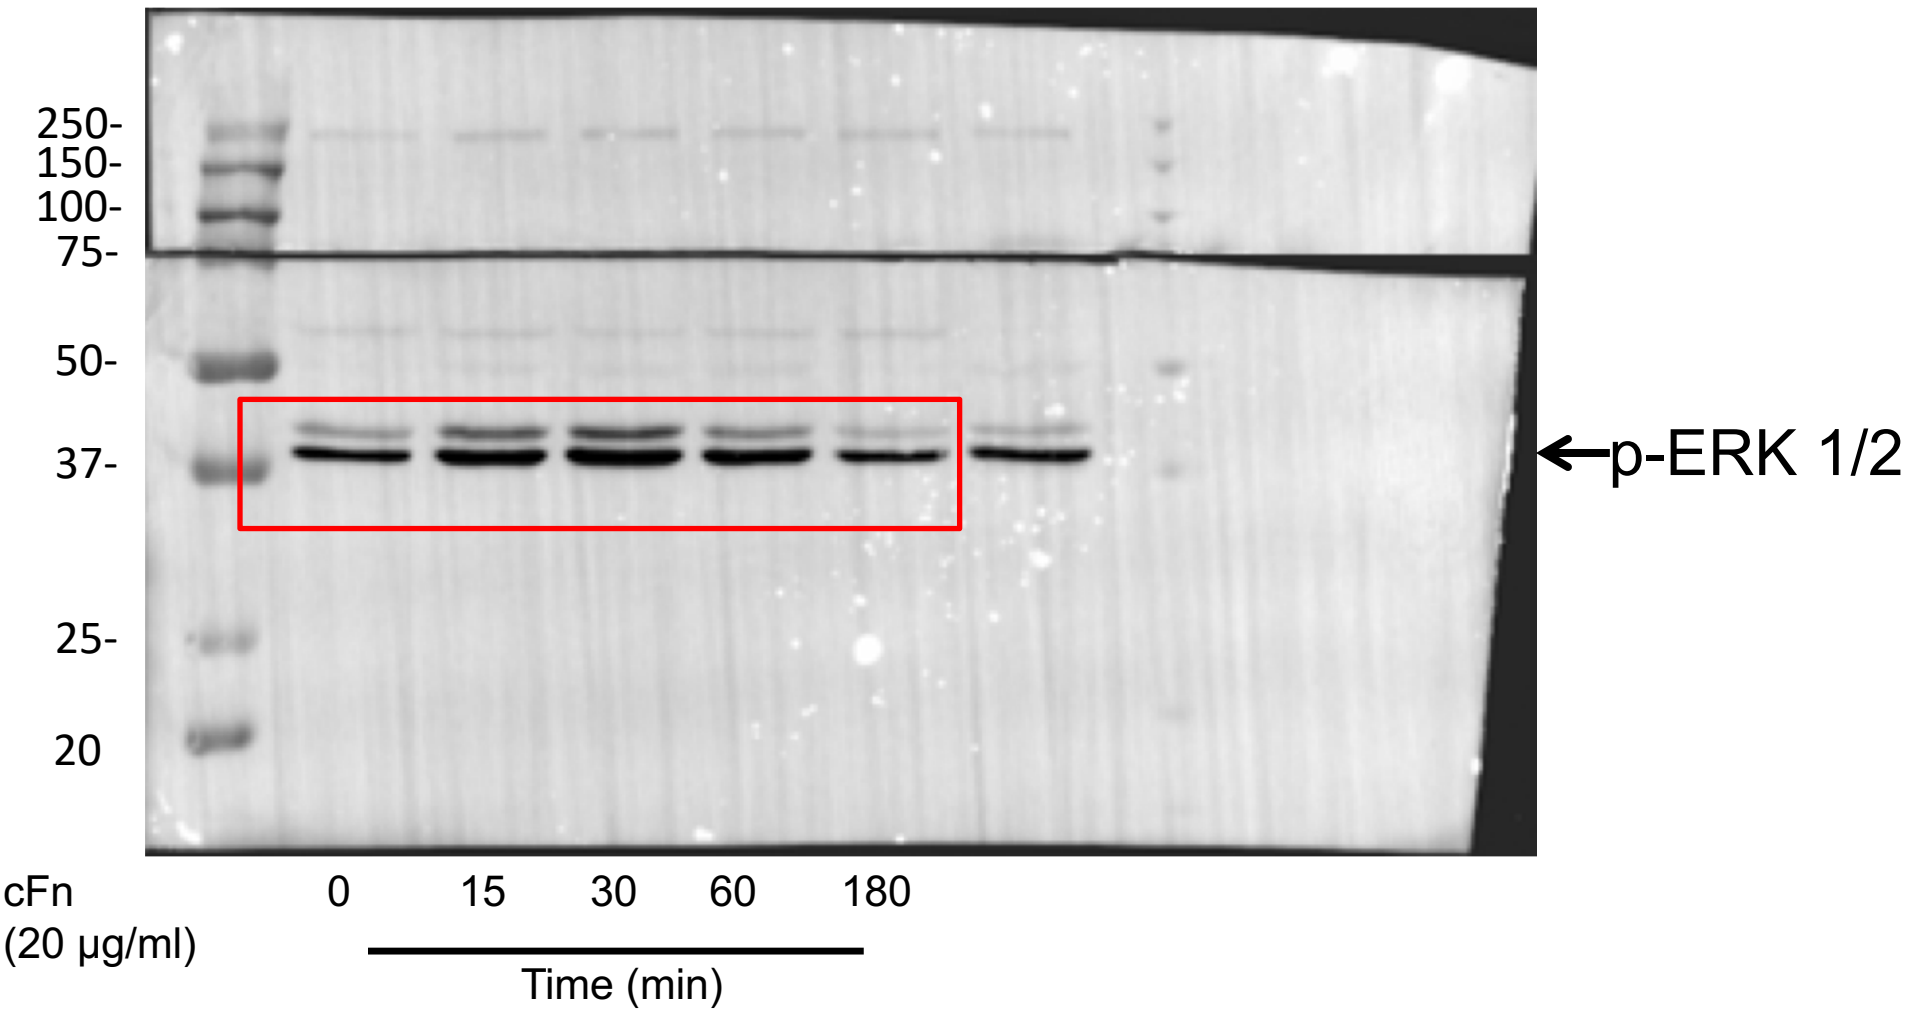



Full unedited gel for Supplemental Figure S9A-ERK 1/2

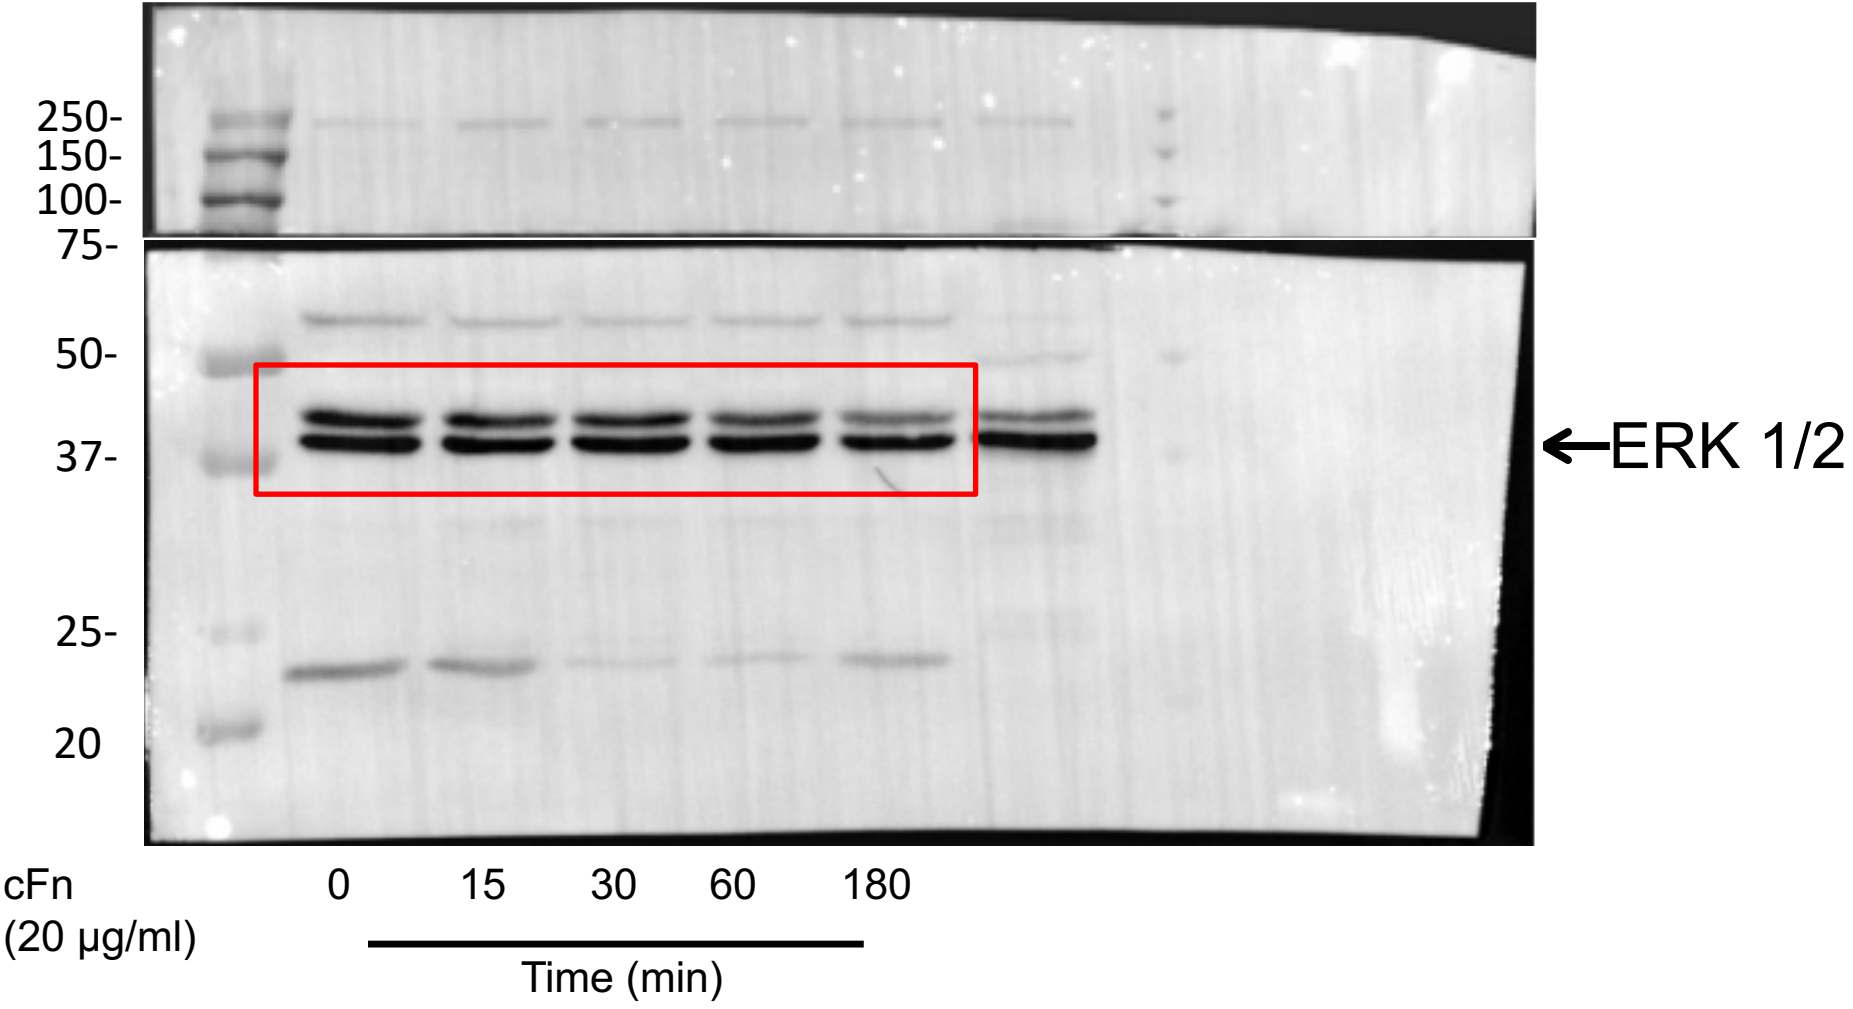

# Full unedited gel for Supplemental Figure S9A- $\beta$ -actin

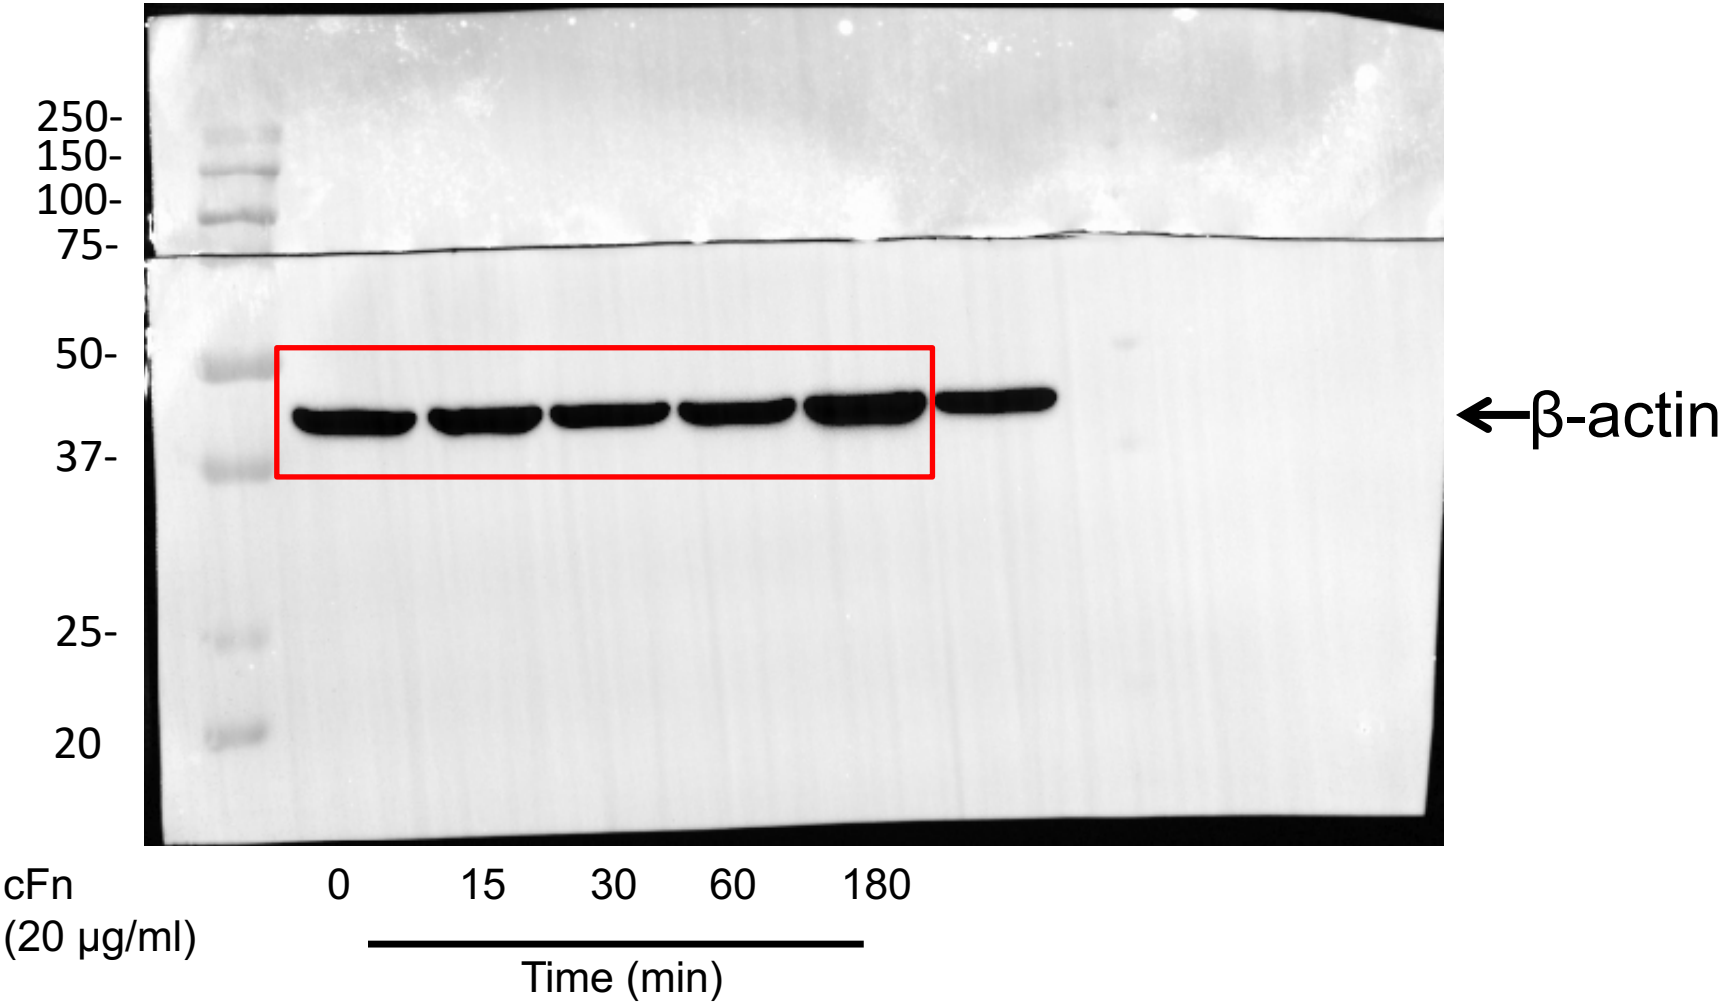

Supplement: sd1 [file 1]
